# Supplementary material for: Completing the triad: synthesis and full characterization of homoleptic and heteroleptic carbonyl and nitrosyl complexes of the group VI metals
Source: PubMed Central journal article supplement — Chem Sci. 2020 Mar 6;11(14):3592–603. doi: 10.1039/c9sc06445a (PMC8152671; doi:10.1039/c9sc06445a), 2020-03-06
Supplement: SC-011-C9SC06445A-s001.pdf [file SC-011-C9SC06445A-s001.pdf]

## Supplementary Information for

# Completing the Triad: Synthesis and full Characterization of Homoleptic and Heteroleptic Carbonyl and Nitrosyl Complexes of the Group VI Metals

M. Sc. Jan Bohnenberger<sup>a</sup>, M. Sc. Manuel Schmitt<sup>a</sup>, M. Sc. Wolfram Feuerstein<sup>b</sup>, Dr. Ivo Krummenacher<sup>c</sup>, Dr. Burkhard Butschke<sup>a</sup>, M. Sc. Jakub Czajka, Dr. Przemysław J. Malinowski<sup>d</sup>, Prof. Dr. Frank Breher<sup>b</sup> and Prof. Dr. Ingo Krossing<sup>a\*</sup>

<sup>a</sup> M. Sc. Jan Bohnenberger, B.Sc. Manuel Schmitt, Prof. Dr. I. Krossing, Institut für Anorganische und Analytische Chemie and Freiburger Materialforschungszentrum (FMF), Universität Freiburg, Albertstr. 21, 79104 Freiburg, Germany.

<sup>b</sup> M. Sc. Wolfram Feuerstein, Prof. Dr. Frank Breher, Karlsruhe Institute of Technology (KIT), Division Molecular Chemistry, Institute of Inorganic Chemistry, Engesserstr. 15, 76131 Karlsruhe (Germany).

<sup>c</sup> Dr. Ivo Krummenacher, Institut für Anorganische Chemie II, Universität Würzburg, Am Hubland, 97074 Würzburg, Germany

<sup>d</sup> M. Sc. Jakub Czajka, Dr. Przemysław J. Malinowski, Centre of New Technologies, University of Warsaw, Banacha 2c, 02-089 Warsaw, Poland.

\* Correspondence to [krossing@uni-freiburg.de](mailto:krossing@uni-freiburg.de)

## Table of Contents

|                                                                               |     |
|-------------------------------------------------------------------------------|-----|
| 1. Supplementary Methods .....                                                | 2   |
| 2. Experimental Glassware .....                                               | 6   |
| 3. Detailed Synthesis, Characterization and Spectra of Compounds 1 to 4.....  | 7   |
| 4. Vibrational Analysis .....                                                 | 22  |
| 5. EPR Spectrum and simulation of the Impurity found in the sample of 3 ..... | 30  |
| 6. Powder XRD Data .....                                                      | 31  |
| 7. Single-Crystal XRD Data of Compounds 1 to 4.....                           | 33  |
| 8. Single-Crystal XRD Data of the side Products.....                          | 48  |
| 9. Additional Information on the DFT Calculations.....                        | 85  |
| 10. References .....                                                          | 100 |

### 1. Supplementary Methods

**General Conditions.** All manipulations on substrates and products were undertaken in a MBraun glovebox filled with Ar or N<sub>2</sub> (O<sub>2</sub>, H<sub>2</sub>O < 1 ppm). All experiments were carried out in special double-Schlenk tubes<sup>[1]</sup> (Supplementary Figure 1) separated by a G3 or G4 frit with grease-free PTFE or glass valves in an inert atmosphere using vacuum and standard Schlenk techniques. Solvents were dried by standard methods using CaH<sub>2</sub> or P<sub>4</sub>O<sub>10</sub>, distilled prior to use and stored over activated molecular sieves. Mo(CO)<sub>6</sub>, W(CO)<sub>6</sub> (both AlfaAesar) and I<sub>2</sub> (Acros) were purified by sublimation before use. Ag[Al(OR<sup>F</sup>)<sub>4</sub>] {R<sup>F</sup> = C(CF<sub>3</sub>)<sub>3</sub>} was synthesized according to literature<sup>[2]</sup> but in SO<sub>2</sub> instead of CH<sub>2</sub>Cl<sub>2</sub>. NO[Al(OR<sup>F</sup>)<sub>4</sub>] {R<sup>F</sup> = C(CF<sub>3</sub>)<sub>3</sub>} was synthesized according to literature.<sup>[3]</sup> Ag[F-{Al(OR<sup>F</sup>)<sub>3</sub>]<sub>2</sub>] {R<sup>F</sup> = C(CF<sub>3</sub>)<sub>3</sub>} was prepared from Ag[PF<sub>6</sub>] (Acros) and Me<sub>3</sub>Si-F-Al(OR<sup>F</sup>)<sub>3</sub><sup>[4]</sup> according to literature.<sup>[5]</sup>

**NMR Spectroscopy.** NMR samples were prepared in 5 mm thick walled NMR tubes with J. Young valves. The <sup>1</sup>H, <sup>13</sup>C{<sup>1</sup>H}, <sup>19</sup>F and <sup>27</sup>Al spectra were recorded either on a Bruker Avance II+ 400 MHz, on a Bruker Avance III HD 300 MHz or on a Bruker Avance 200 MHz spectrometer either in 1,2-F<sub>2</sub>C<sub>6</sub>H<sub>4</sub> (*ortho*-difluorobenzene, *o*DFB) or CD<sub>2</sub>Cl<sub>2</sub> (0.4-0.6 mL) at r.t. Measurements conducted in 1,2-F<sub>2</sub>C<sub>6</sub>H<sub>4</sub> were calibrated by using the <sup>19</sup>F signal of the

solvent 1,2-F<sub>2</sub>C<sub>6</sub>H<sub>4</sub> ( $\delta = -139.0$  ppm<sup>[6]</sup>, rel. to CCl<sub>3</sub>F). The field corrections of other nuclei were adjusted accordingly. Measurements conducted in 1,2,3,4-F<sub>4</sub>C<sub>6</sub>H<sub>2</sub> were calibrated to the residual solvent signal for <sup>1</sup>H ( $\delta = 7.04$  ppm<sup>[7]</sup>, rel. to TMS). The field corrections of other nuclei were adjusted accordingly. The Bruker Topspin software package (version 3.2) was used for measuring and processing of the spectra. Typically, very tiny impurities were detected in the <sup>19</sup>F NMR at  $-74.8$  (HOC(CF<sub>3</sub>)<sub>3</sub>) and  $-75.5$  ppm. All graphical representations were performed using Topspin (version 3.5pl7).

**Vibrational Spectroscopy.** FTIR measurements were performed on a FTIR Bruker ALPHA with a QuickSnap Platinum ATR sampling module inside the glovebox. The data were processed with the Bruker OPUS 7.5 software package. Unless otherwise stated, the spectra were recorded in the range of 4000-550 cm<sup>-1</sup> with a resolution of 2 cm<sup>-1</sup> at r.t. and a base line correction with 3 iterations was applied. FT Raman spectra were recorded on a Bruker VERTEX 70 spectrometer equipped with a RAM II module (1064 nm exciting line of a NdYAG laser) by using a highly sensitive liquid N<sub>2</sub> cooled Ge detector. The samples were measured in flame sealed soda-lime glass Pasteur pipettes in the range of 4000-50 cm<sup>-1</sup> with a resolution of 4 cm<sup>-1</sup> at r.t. The data were processed with the Bruker OPUS 7.5 software package. Unless otherwise noted, the Raman spectra were cut off below 75 cm<sup>-1</sup> and a baseline correction with 5 iterations was applied. All IR and Raman spectra were normalized to 1 and intensities are given as follows: vvw = very very weak (< 0.1), vw = very weak (< 0.2), w = weak (< 0.3), mw = medium weak (< 0.4), m = medium (< 0.5), ms = medium strong (< 0.6), s = strong (< 0.7), vs = very strong (< 0.8), vvs = very very strong ( $\geq 0.9$ ). Extremely weak bands (< 0.025) are not reported. Typical artefacts in the spectra appear at about 2939 and 2757 cm<sup>-1</sup>, especially for weakly scattering samples. Graphical representations have been done with OPUS 7.5 or with OriginPro (version 9.2).

**Single-Crystal X-ray Diffraction.** Single crystals were selected at r.t. under perfluoropolyalkylether oil (AB128330, ABCR GmbH & Co. KG) on 0.1, 0.2 or 0.3 mm micromounts (M1-L19-100/200/300). Structural data were collected from shock-cooled crystals on a Bruker SMART APEX II Quazar CCD area detector diffractometer using a D8 goniometer with an Incoatec Mo-Microfocus Source I $\mu$ S with mirror-monochromated Mo-K $\alpha$  radiation ( $\lambda = 0.71073$  Å) at 100(2) K. The diffractometer was equipped with an Oxford Cryosystem 800 low temperature device. The data were processed with APEX v2013.6-2, integrated with SAINT<sup>[8]</sup> (V8.37A) and an empirical absorption correction using SADABS 2014/5<sup>[9]</sup> or SADABS 2016/2<sup>[9]</sup> was applied. The structures were solved by direct methods

using SHELXT<sup>[10,11]</sup>. Unless otherwise stated, all non-hydrogen atoms were refined anisotropically by full matrix least squares methods against weighted  $F^2$  values based on all independent reflections by using SHELXL-2014/7<sup>[11,12]</sup> with ShelXle as GUI software<sup>[13]</sup>. Disordered fragments were modelled with the help of the DSR software<sup>[14]</sup>. The graphical presentation of crystal structures was prepared either with Mercury (version 3.9)<sup>[15]</sup> or with OLEX2 (version 1.2)<sup>[16]</sup>. CCDC codes 1952378-1952389 contain the supplementary crystallographic data for this paper. These data can be obtained free of charge from The Cambridge Crystallographic Data Centre via: <https://summary.ccdc.cam.ac.uk/structure-summary-form>.

**Powder Diffraction.** The powder diffractograms were recorded with the sample in a 0.5 mm thick capillary (Hilgenberg GmbH, wall thickness 0.01 mm) sealed with perfluoropolyalkylether oil (AB128330, ABCR GmbH & Co. KG), at RT and about 100(10) K in the  $2-\Theta$  range  $2-44^\circ$  with a STOE STADI P powder diffractometer with Mo- $K_{\alpha 1}$  radiation ( $\lambda = 0.709300 \text{ \AA}$ ) equipped with a Ge-(111) monochromator and a silicon microstripe detector (Mythen 1K). Data acquiring, processing and the calculation of powder diffractograms from single-crystal data were performed using STOE WinXPOW<sup>®</sup> package.

**EPR Spectroscopy.** EPR spectra at X-band (9.38 GHz) were carried out using a Bruker ELEXSYS E580 CW EPR spectrometer equipped with an Oxford Instruments helium cryostat (ESR900) and a MercuryiTC temperature controller. Samples were filled into fused silica glass tubes. Solvents were vacuum transferred to the samples and afterwards the sample tubes were sealed under vacuum. The spectral simulations were performed using MATLAB 9.6 (2019a) and the EasySpin 5.2.25 toolbox.<sup>[17]</sup>

**Computational Details.** Quantum chemical calculations were performed with the TURBOMOLE<sup>[18]</sup> program package (version 7.0). All investigated molecular structures were optimized at the density functional theory (DFT) and were run in redundant internal coordinates using the BP86<sup>[19]</sup> and B3LYP<sup>[20]</sup> functional with the resolution-of-identity (RI) approximation<sup>[21]</sup> together with the basis set def2-TZVPP<sup>[22]</sup> and with dispersion correction (DFT-D3BJ)<sup>[23]</sup>. A fine integration grid (m4; 5 for NMR calculations) and the default SCF convergence criteria ( $10^{-6}$  a.u.) were used. All optimized structures were checked for minima (no imaginary frequencies) with the implemented module AOFORCE<sup>[24]</sup> and for proper spin occupancies using the implemented module EIGER. Entropic contributions to enthalpy and Gibbs free energy with inclusion of zero point energies (ZPE) were calculated at the BP86-D3BJ/def2-TZVPP level for standard conditions with the FREEH module. Solvation

effects were calculated using the COSMO<sup>[25]</sup> module combined with a geometry optimization in C1 symmetry. Default options and standard optimized COSMO radii included in the module were used. For the calculation of the reaction energies in solution, FREEH enthalpy/entropy of the gas phase calculation were used for the COSMO calculations.

Symmetry restricted structure optimizations of the  $[\text{Mo}(\text{CO})_6]^+$  and cation  $[\text{W}(\text{CO})_6]^+$  were performed with the TURBOMOLE 7.4 software package on the TPSSh<sup>[26]</sup>/def2-TZVPP level of theory with RI approximation and D3-BJ dispersion correction (integration grid m5, SCF convergence  $10^{-9}$  a.u., density convergence  $\leq 10^{-7}$ , cartesian gradient  $\leq 10^{-4}$ ). In a previous study we identified the TPSSh functional as suitable choice for minimum energy comparisons<sup>[27]</sup>. DLPNO-CCSD(T)/def2-TZVPP single point energy calculations were performed with the ORCA 4.2<sup>[28]</sup> program code without symmetry restriction. We have chosen tight thresholds for the domain-based local pair natural orbital method (DLPNO), i.e. pair correlation energy threshold  $\text{TCutPairs}=10^{-5}$  Eh, PNO occupation threshold  $\text{TCutPNO}=10^{-7}$  and domain size for PNO expansion  $\text{TCutMKN}=10^{-4}$ . We made use of the RIJCOSX procedure.<sup>[29]</sup> State Averaged (SA) Complete Active Shell Self Consistent Field (CAS-SCF)<sup>[30]</sup> calculations were done with ORCA 4.2. Scalar relativistic effects were taken into account by means of the second order DKH procedure<sup>[31]</sup>. A gaussian finite nucleus model was used.<sup>[32]</sup> The relativistically recontracted versions of the def2-TZVPP basis sets for carbon and oxygen as implemented by Dimitrios Pantazis into the ORCA program package, the def-TZVPP basis set for molybdenum<sup>[33]</sup> and the SARC-DKH-TZVPP basis set for tungsten were used.

The SA-CAS-SCF calculations were carried out in the basis of 9 doublet and 6 quartet roots arising from the 2I and 4G terms of the free  $\text{Mo}^+$  and  $\text{W}^+$  cations, respectively. The active space consists of 5 electrons in 5 orbitals of the second and third d-shell, respectively, and one additional d-orbital of the respective higher d-shell, i.e. CAS(5,6).

## 2. Experimental Glassware

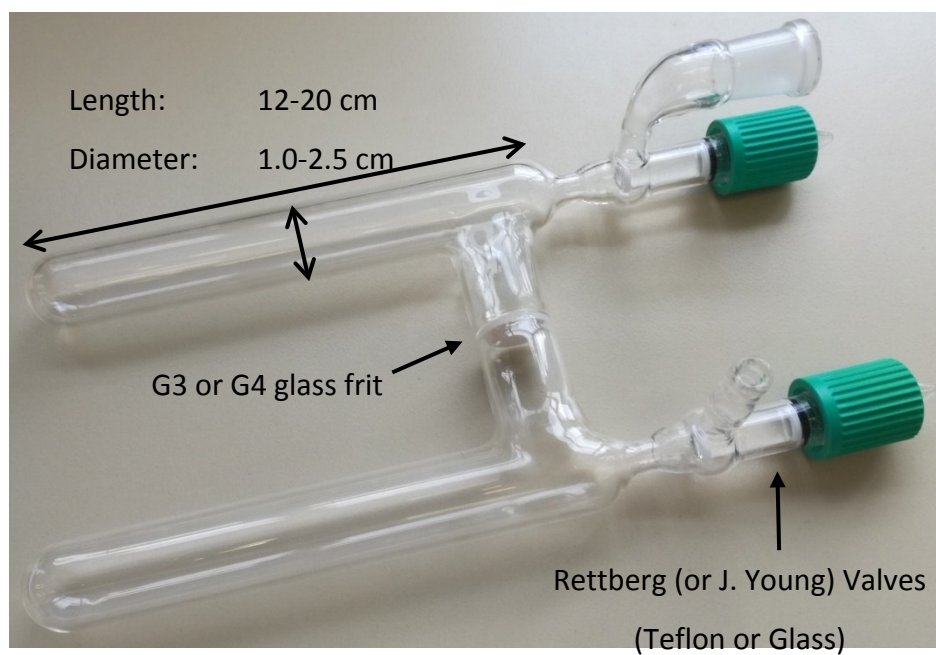

*Supplementary Figure 1.* Double-Schlenk tube that was typically used for most reactions and crystallizations. Note that different varieties (sizes, Rettberg or J. Young valves) were used. Picture taken by Jan Bohnenberger.

### 3. Detailed Synthesis, Characterization and Spectra of Compounds 1 to 4

#### Synthesis of [Mo(CO)<sub>5</sub>(NO)][Al(OR<sup>F</sup>)<sub>4</sub>] (**1**)

Inside the glovebox, Mo(CO)<sub>6</sub> (75 mg, 0.284 mmol) and NO[Al(OR<sup>F</sup>)<sub>4</sub>] (283 mg, 0.285 mmol, 1 eq) were weighed into a double-Schlenk tube. Then, *o*DFB (~3 mL) was added and immediate gas evolution could be observed. After stirring at room temperature (r.t.) for a few minutes, the initially red-brown solution turned clear orange. The solution was stirred for a total of one hour to ensure a complete reaction and was then crystallized *via* slow vapour diffusion of *n*-pentane at r.t. into the *o*DFB solution. Bright red-orange block-shaped crystals of **1** were obtained after a few days. Crystalline yield: 302 mg, 86%.

**FTIR** (ZnSe, ATR):  $\tilde{\nu}/\text{cm}^{-1}$  (intensity) = 2186 (w), 2612 (vw), 2124 (vvw), 2099 (vvs), 2070 (vvw), 1820 (s), (1786 (vvw)), 1352 (w), 1297 (vvw), 1266 (vvw), 1239 (vvw), 1208 (vvs), 1160 (vvw), 1139 (vvw), 969 (vvs), 831 (w), 756 (vw), 726 (vvs), 617 (w), 560 (mw).

**FT Raman** (100 scans, 500 mW, 4 cm<sup>-1</sup>):  $\tilde{\nu}/\text{cm}^{-1}$  (intensity) = 2187 (mw), 2163 (m), 2124 (vvs), 2106 (vvw) 2071 (vvw), 1825 (vvw), 1271 (vvw), 977 (vvw), 798 (vvw), 747 (vvw), 564 (vw), 538 (vvw), 473 (vvw), 363 (vvw), 329 (vvw), 289 (vvw), 234 (vvw), 101 (vs).

**<sup>1</sup>H NMR** (400.17 MHz, *o*DFB, 298 K): *only solvent signals*; **<sup>13</sup>C{<sup>1</sup>H}** NMR (100.62 MHz, *o*DFB, 298 K):  $\delta/\text{ppm}$  = 193.1 (s, 4C<sub>eq</sub>, [Mo(CO)<sub>5</sub>(NO)]<sup>+</sup>), 179.7 (s, 1C<sub>ax</sub>, [Mo(CO)<sub>5</sub>(NO)]<sup>+</sup>), 121.7 (q, <sup>1</sup>J(C,F) = 293 Hz, 12C, CF<sub>3</sub>, *in part overlapped by solvent signals*), 79.5 (m, 4C, Al(OC(CF<sub>3</sub>)<sub>3</sub>)<sub>4</sub>); **<sup>14</sup>N NMR** (28.92 MHz, *o*DFB, 298 K):  $\delta/\text{ppm}$  = -70.9 (s, N<sub>2</sub> from glovebox atmosphere), 3 (br. s, 1N, [Mo(CO)<sub>5</sub>(NO)]<sup>+</sup>); **<sup>19</sup>F NMR** (376.54 MHz, *o*DFB, 298 K):  $\delta/\text{ppm}$  = -75.2 (s, 36F, 4 × C(CF<sub>3</sub>)<sub>3</sub>); **<sup>27</sup>Al NMR** (104.27 MHz, *o*DFB, 298 K):  $\delta/\text{ppm}$  = 35.1 (s, 1Al, Al(OR<sup>F</sup>)<sub>4</sub>).

*Note:* This reaction also works in CH<sub>2</sub>Cl<sub>2</sub> or SO<sub>2</sub>. The solubility of the starting materials in CH<sub>2</sub>Cl<sub>2</sub> is moderate, so longer reaction times are required. Especially **1** and **2** are poorly soluble in CH<sub>2</sub>Cl<sub>2</sub> and the solvent needs to be changed to *o*DFB for crystallization.

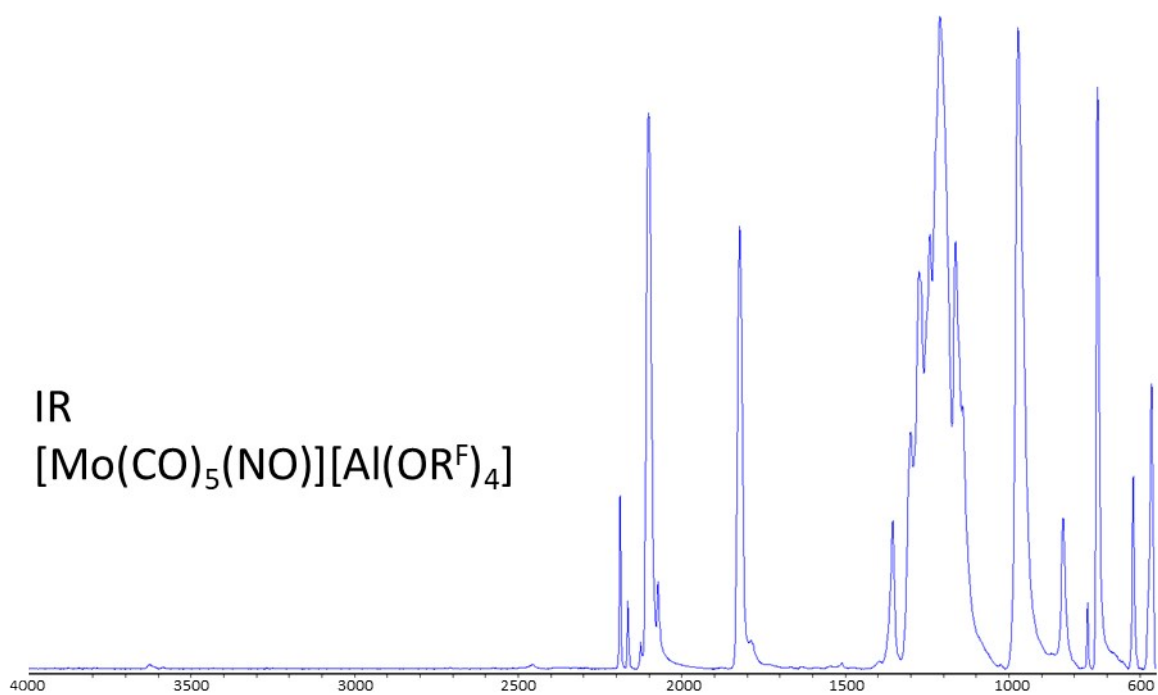

Supplementary Figure 2. Experimental IR spectrum of **1**.

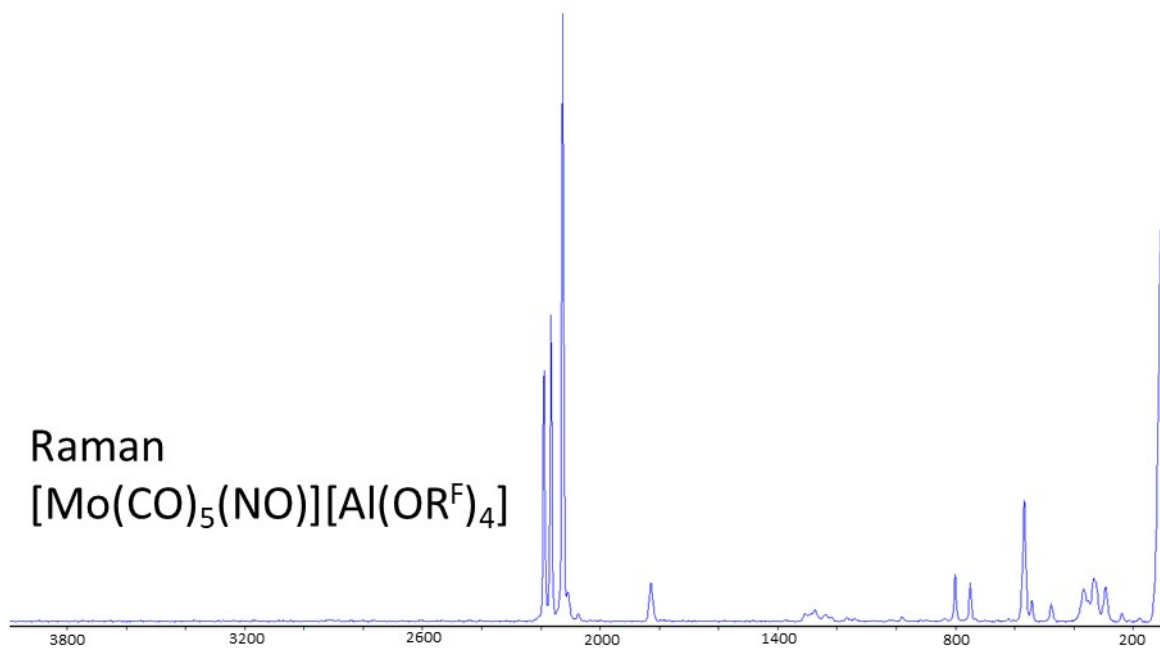

Supplementary Figure 3. Experimental Raman spectrum of **1**.



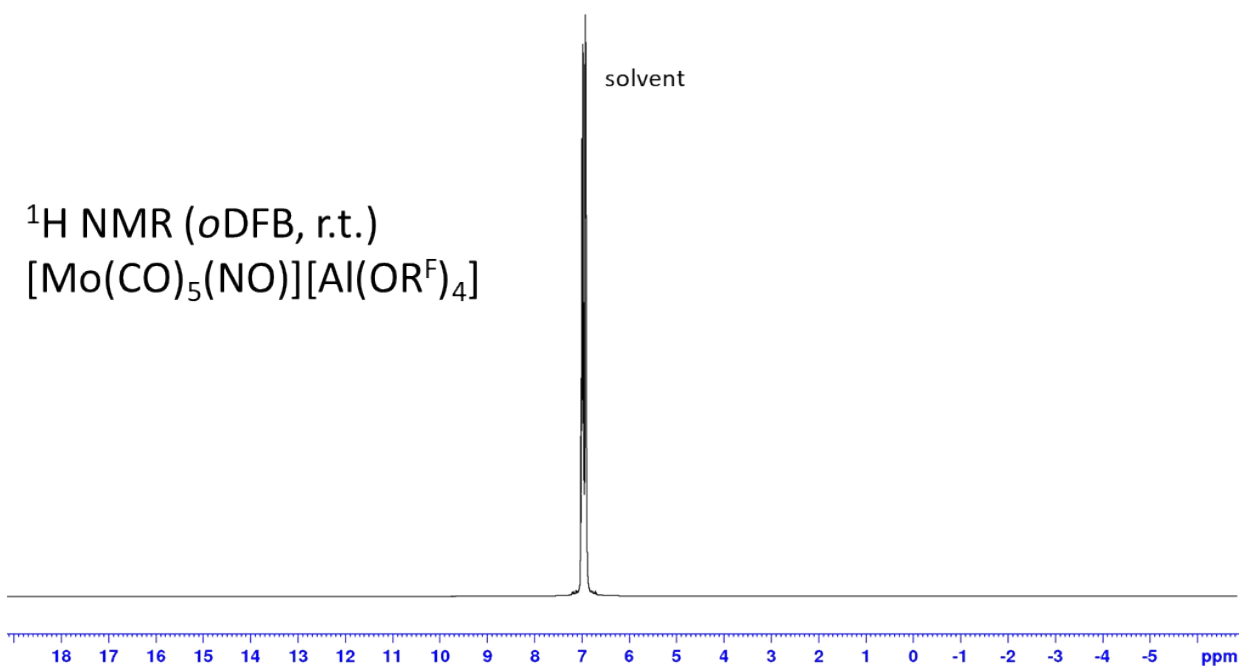

Supplementary Figure 4.  $^1\text{H}$  NMR (400.17 MHz, *o*DFB, r.t.) spectrum of **1**.

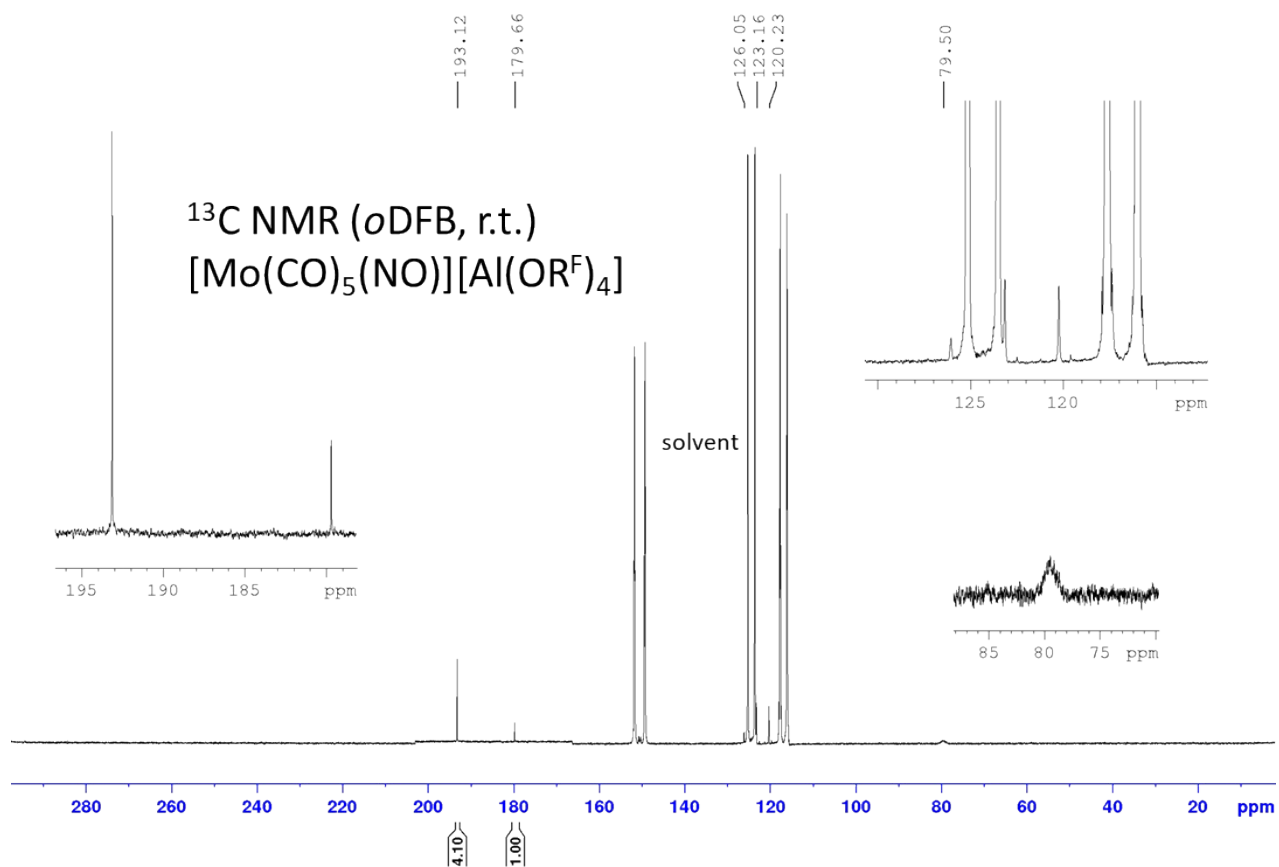

Supplementary Figure 5.  $^{13}\text{C}$  NMR (100.62 MHz, *o*DFB, r.t.) spectrum of **1**.

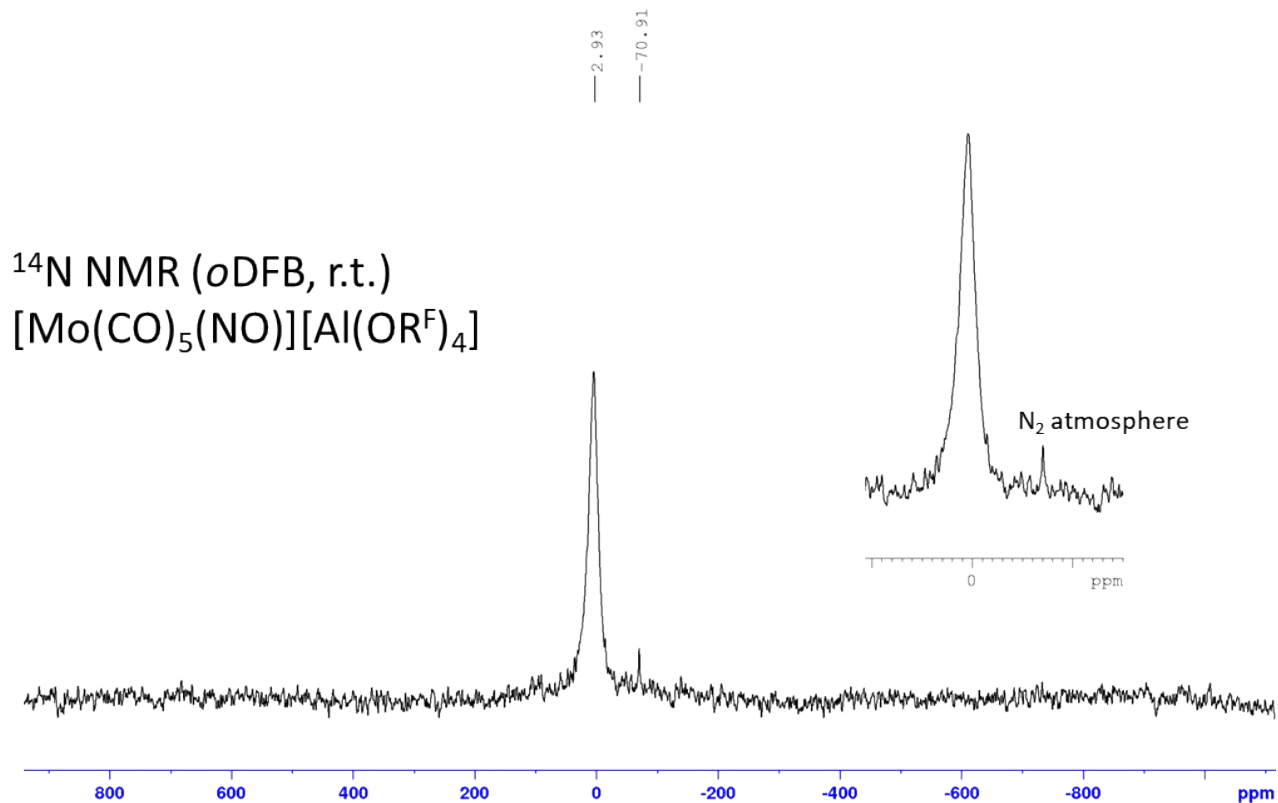

Supplementary Figure 6.  $^{14}\text{N}$  NMR (28.92 MHz, oDFB, r.t.) spectrum of **1**.

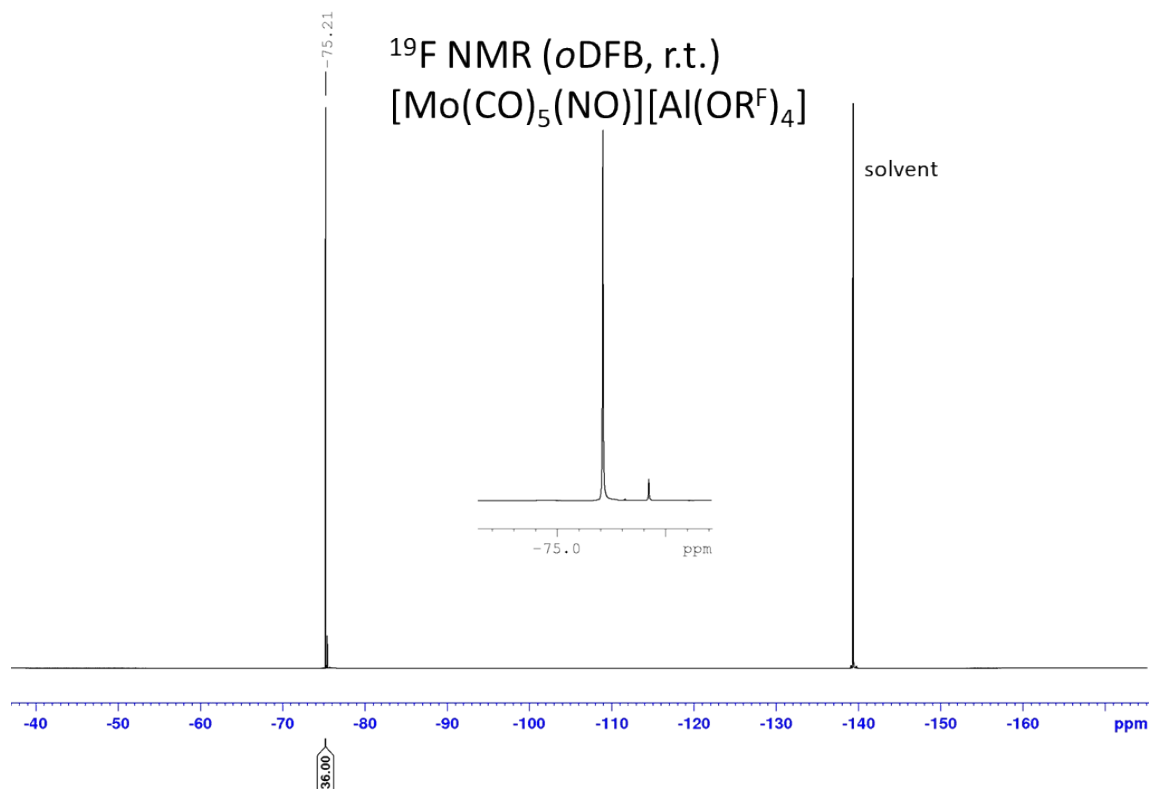

Supplementary Figure 7.  $^{19}\text{F}$  NMR (376.54 MHz, oDFB, r.t.) of **1**.

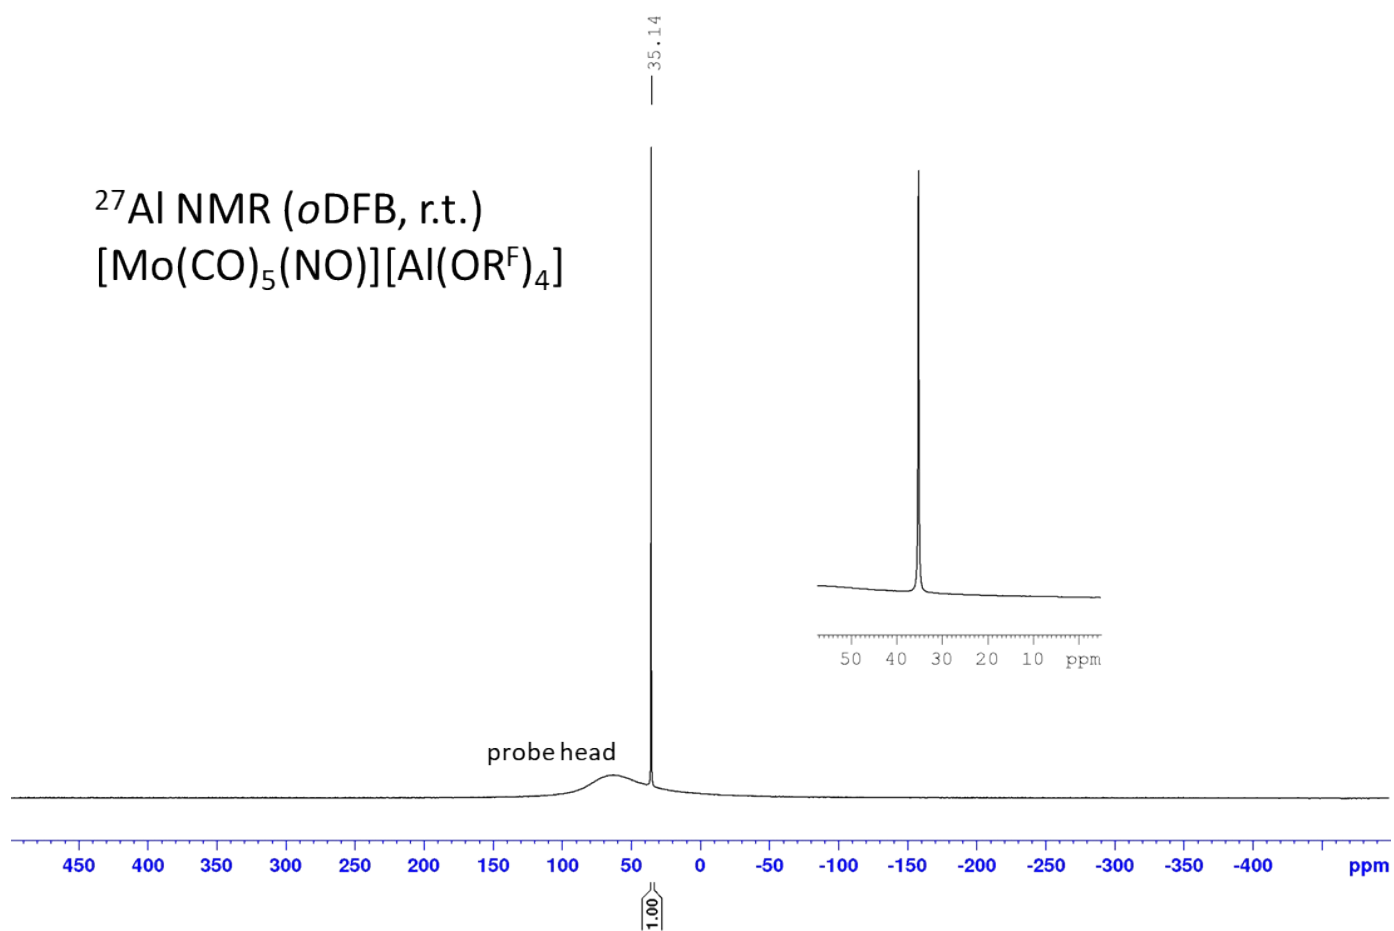

Supplementary Figure 8.  $^{27}\text{Al}$  NMR spectrum (104.27 MHz, oDFB, r.t.) of **1**.

## Synthesis of $[\text{W}(\text{CO})_5(\text{NO})][\text{Al}(\text{OR}^{\text{F}})_4]$ (**2**)

Inside the glovebox,  $\text{W}(\text{CO})_6$  (75 mg, 0.213 mmol) and  $\text{NO}[\text{Al}(\text{OR}^{\text{F}})_4]$  (213 mg, 0.214 mmol, 1 eq) were weighed into a double-Schlenk tube. Then, *o*DFB (~3 mL) was added and immediate gas evolution could be observed. After stirring at room temperature (r.t.) for a few minutes, the initially red-brown solution turned clear orange. The solution was stirred for a total of one hour to ensure a complete reaction and was then crystallized *via* slow vapour diffusion of *n*-pentane at r.t. into the *o*DFB solution. Bright red-orange block-shaped crystals of **2** were obtained after a few days. Crystalline yield: 260 mg, 92%.

**FTIR** (ZnSe, ATR):  $\tilde{\nu}/\text{cm}^{-1}$  (intensity) = 2183 (vw), 2153 (vw), 2113 (vww), 2090 (vs), 2059 (vww), 1818 (ms), 1352 (vw), 1298 (vww), 1273 (vw), 1239 (vww), 1209 (vvs), 1161 (w), 1138 (vww), 970 (vvs), (859 (vww)), 831 (vw), 756 (vww), 726 (vvs), 604 (vw), 572 (vww), 561 (vw).

**FT Raman** (100 scans, 500 mW,  $4 \text{ cm}^{-1}$ ):  $\tilde{\nu}/\text{cm}^{-1}$  (intensity) = 2184 (m), 2155 (m), 2114 (vvs), 2095 (vww), 2061 (vww), 1823 (vww), 1271 (vww), 978 (vww), 797 (vww), 747 (vww), 546 (w), 492 (vww), 393 (vww), 374 (vww), 321 (vww), 234 (vww), 106 (vs).

**$^1\text{H}$  NMR** (300.18 MHz, *o*DFB, 298 K): *only solvent signals*;  **$^{13}\text{C}\{^1\text{H}\}$  NMR** (75.48 MHz, *o*DFB, 298 K):  $\delta/\text{ppm}$  = 185.6 (s,  $4\text{C}_{\text{eq}}$ ,  $[\text{W}(\text{CO})_5(\text{NO})]^+$ ), 185.6 (d,  $^1J(\text{C},\text{W}) = 185 \text{ Hz}$ ,  $4\text{C}_{\text{eq}}$ , 14%  $[\text{W}(\text{CO})_5(\text{NO})]^+$ ), 179.7 (s,  $1\text{C}_{\text{ax}}$ ,  $[\text{W}(\text{CO})_5(\text{NO})]^+$ ), 121.8 (q,  $^1J(\text{C},\text{F}) = 293 \text{ Hz}$ ,  $12\text{C}$ ,  $\text{CF}_3$ , *in part overlapped by solvent signals*), 79.7 (m,  $4\text{C}$ ,  $\text{Al}(\text{OC}(\text{CF}_3)_3)_4$ );  **$^{14}\text{N}$  NMR** (21.69 MHz, *o*DFB, 298 K):  $\delta/\text{ppm}$  = -15 (br. s,  $1\text{N}$ ,  $[\text{W}(\text{CO})_5(\text{NO})]^+$ ), ;  **$^{19}\text{F}$  NMR** (282.45 MHz, *o*DFB, 298 K):  $\delta/\text{ppm}$  = -75.2 (s,  $36\text{F}$ ,  $4 \times \text{C}(\text{CF}_3)_3$ );  **$^{27}\text{Al}$  NMR** (78.22 MHz, *o*DFB, 298 K):  $\delta/\text{ppm}$  = 35.1 (s,  $1\text{Al}$ ,  $\text{Al}(\text{OR}^{\text{F}})_4$ ).

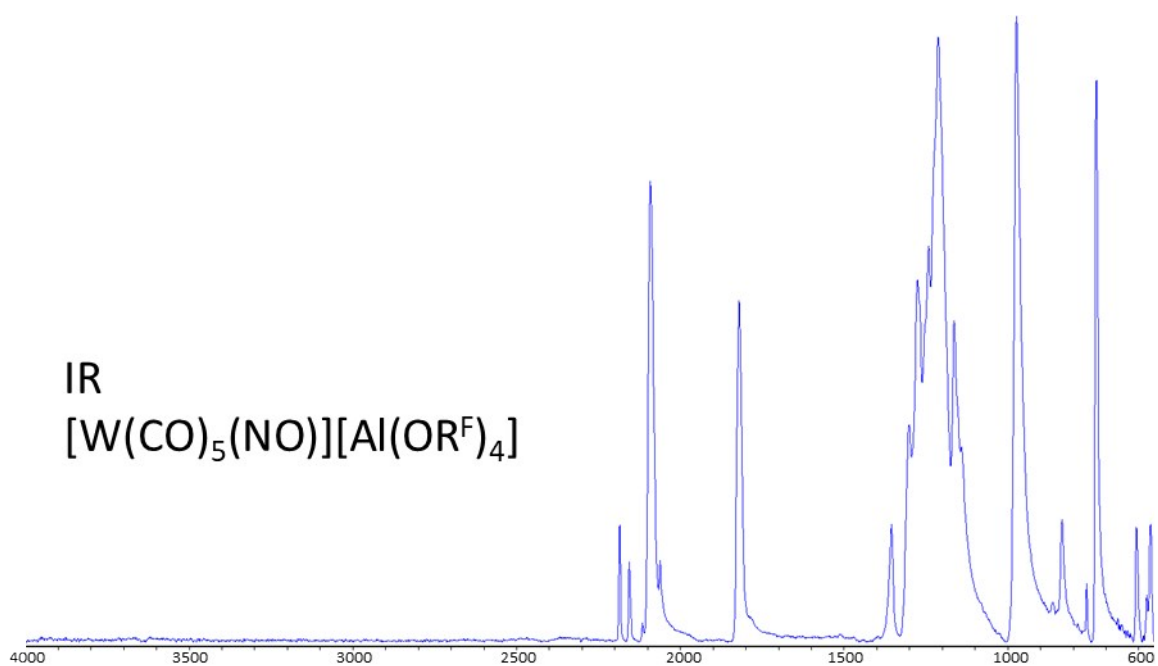

Supplementary Figure 9. Experimental IR spectrum of **2**.

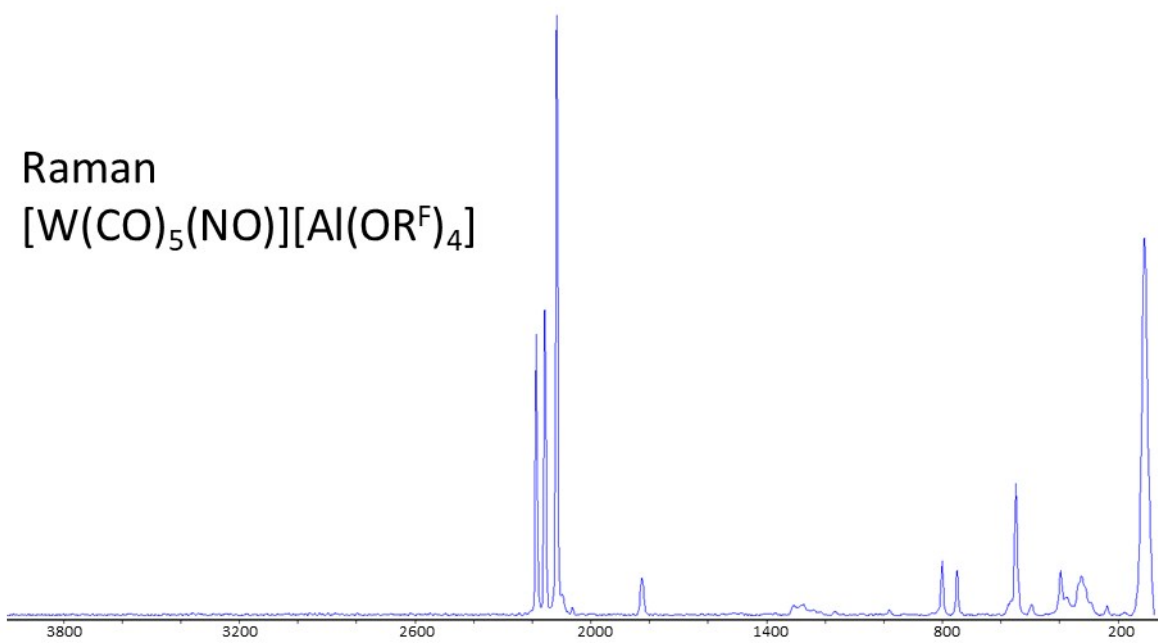

Supplementary Figure 10. Experimental Raman spectrum of **2**.

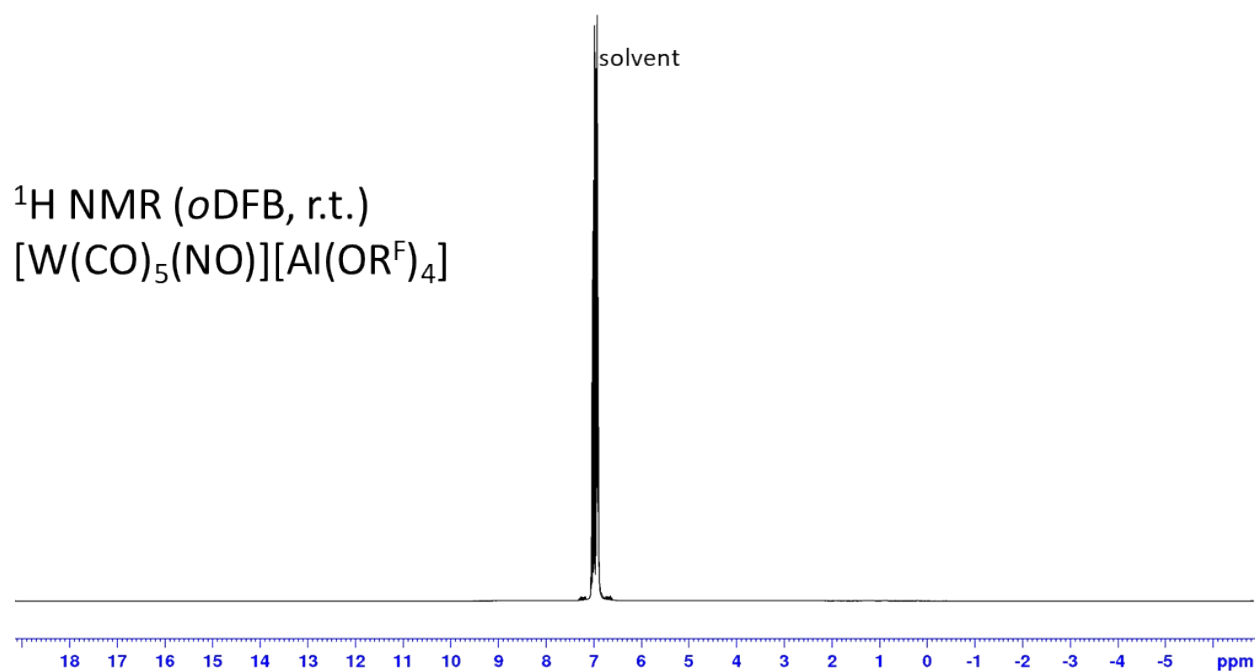

Supplementary Figure 11.  $^1\text{H}$  NMR spectrum (300.18 MHz, *o*DFB, r.t.) of **2**.

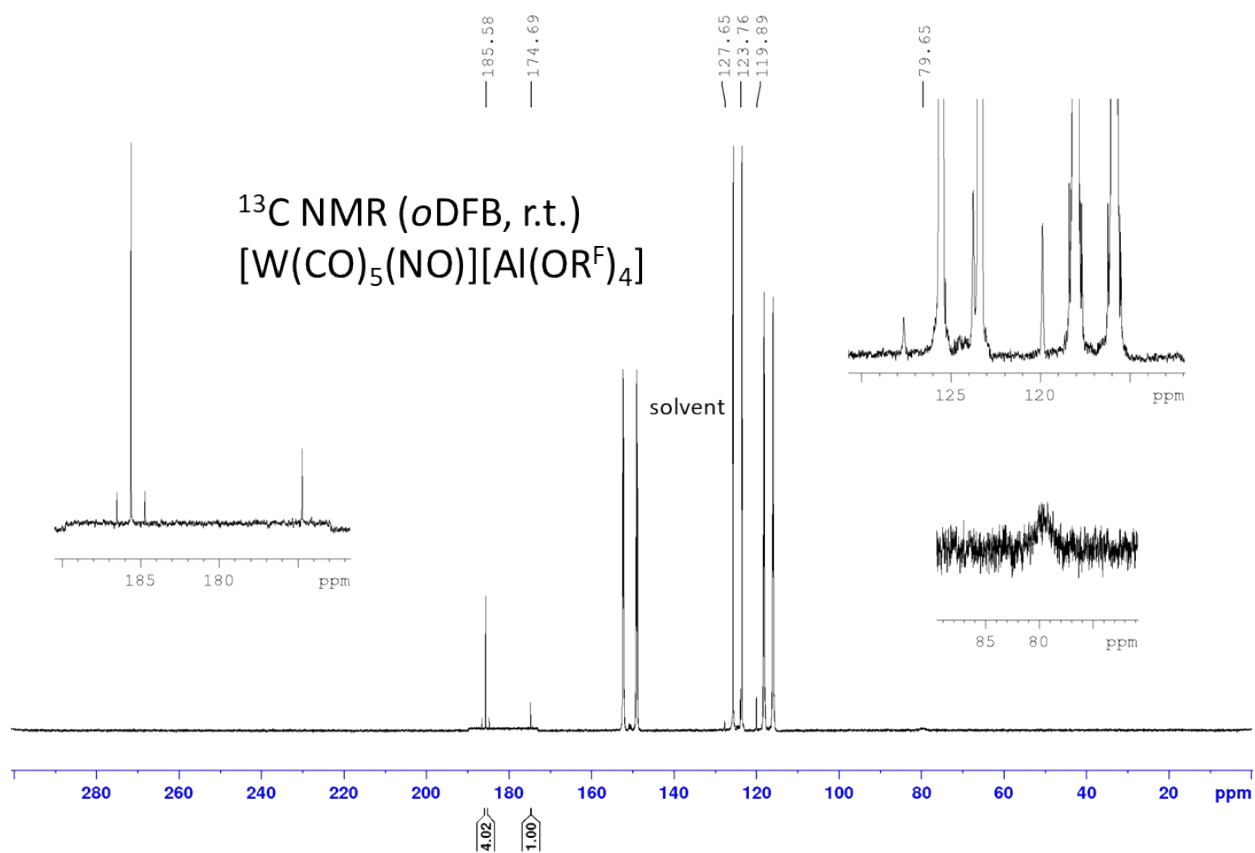

Supplementary Figure 12.  $^{13}\text{C}$  NMR spectrum (75.48 MHz, *o*DFB, r.t.) of **2**.

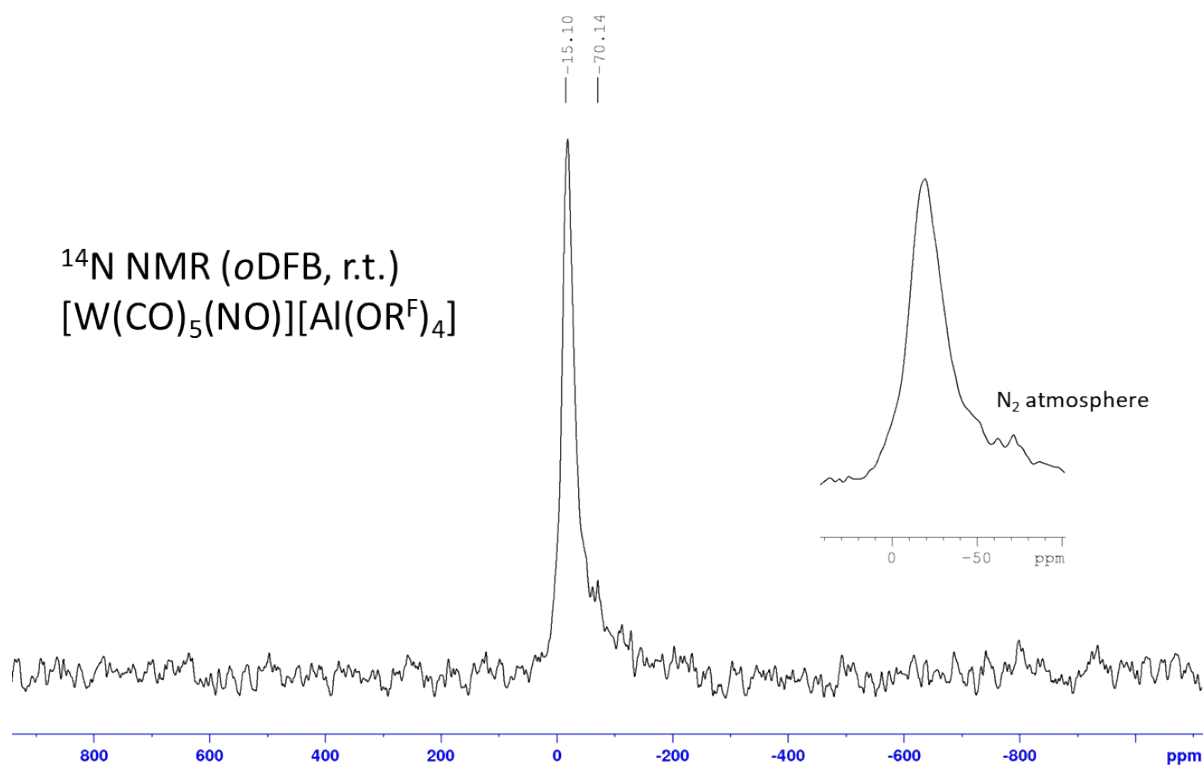

Supplementary Figure 13.  $^{14}\text{N}$  NMR spectrum (21.69 MHz, oDFB, r.t.) of **2**.

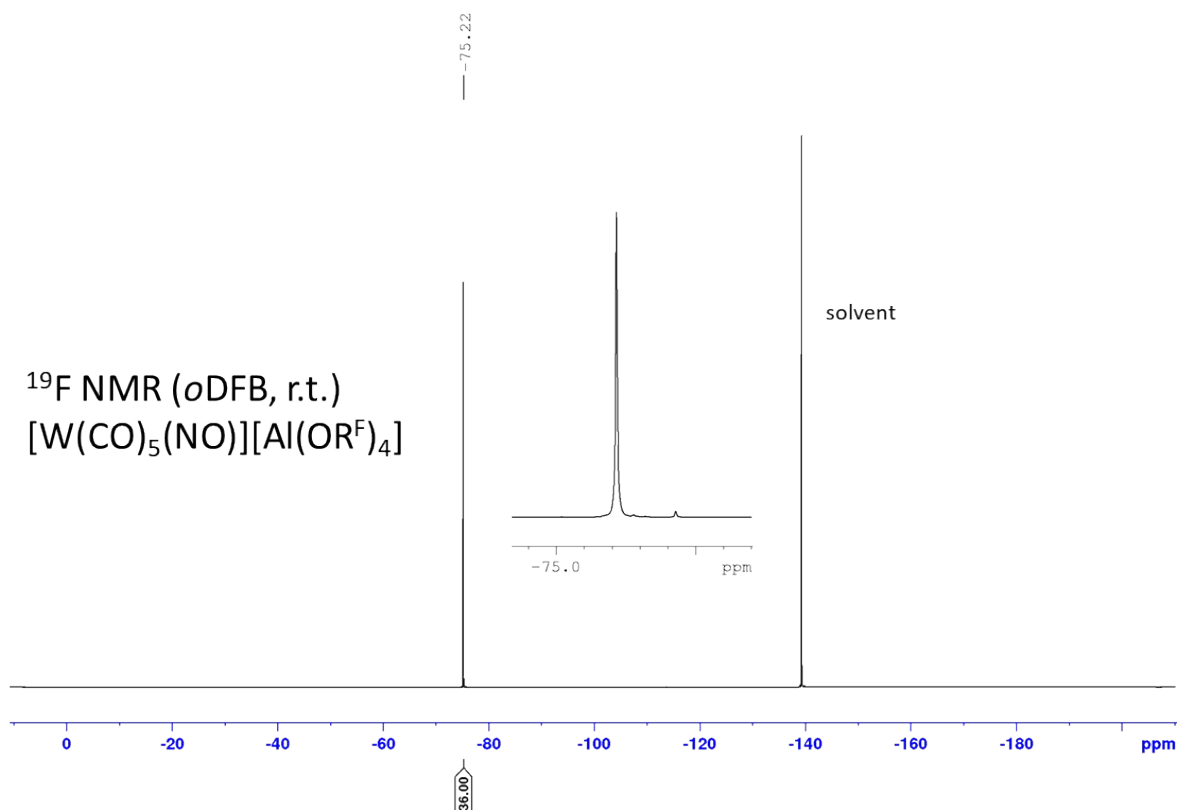

Supplementary Figure 14.  $^{19}\text{F}$  NMR spectrum (282.45 MHz, oDFB, r.t.) of **2**.

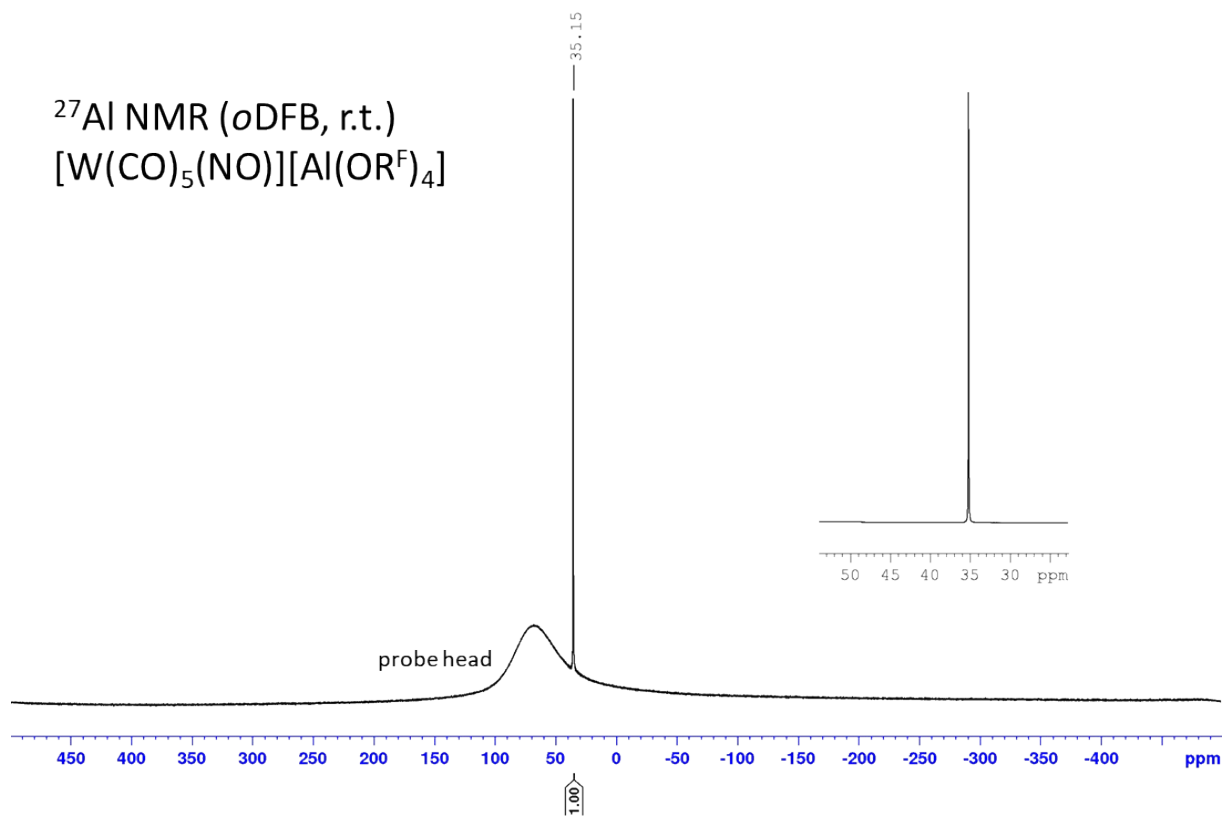

Supplementary Figure 15.  $^{27}\text{Al}$  NMR spectrum (78.22 MHz, *o*DFB, r.t.) of **2**.



### Synthesis of $[\text{Mo}(\text{CO})_6][\text{F}-\{\text{Al}(\text{OR}^{\text{F}})_3\}_2]$ (**3**)

$\text{I}_2$  (53.9 mg, 0.212 mmol, 1 eq) was added to a double-Schlenk tube. Inside the glovebox, first  $\text{Ag}[\text{F}-\{\text{Al}(\text{OR}^{\text{F}})_3\}_2]$  (676 mg, 0.425 mmol, 2 eq) and afterwards  $\text{Mo}(\text{CO})_6$  (112 mg, 0.424 mmol, 2 eq) were added to the iodine. Upon contact of the solids, the formation of purple  $\text{Ag}/\text{I}_2$  species was observed. Then, about 4 mL of 1,2,3,4-tetrafluorobenzene (TFB) were added at 0 °C and the initially purple solution turned to a brown suspension over the course of a few minutes of stirring. The reaction mixture was allowed to reach RT overnight and eventually a dark solution with yellow precipitate was obtained which was then filtered to remove the  $\text{AgI}$ . Subsequent crystallization by vapour-diffusion of *n*-pentane into the TFB solution over the course of five days led to the formation of near-colourless crystals of **3**. Yield: 580 mg, 78%.

**FTIR** (ZnSe, ATR):  $\tilde{\nu}/\text{cm}^{-1}$  (intensity) = 2089 (vvs), 1355 (vw), 1300 (mw), 1278 (ms), 1247 (vvs), 1216 (vvs), 1184 (vs), 1129 (vw), 972 (vvs), 865 (w), 760 (vww), 726 (vvs), 638 (w), 568 (w).

**FT Raman** (1000 scans, 250 mW, 4  $\text{cm}^{-1}$ ):  $\tilde{\nu}/\text{cm}^{-1}$  (intensity) = 2175 (vvs), 2118 (mw), 1365 (vww), 1280 (vww), 1179 (vww), 1131 (vww), 981 (vww), 818 (vw), 753 (m), 730 (vww), 572 (vww), 539 (vw), 361 (vw), 326 (w), 294 (vw), 233 (vww), 84 (w).

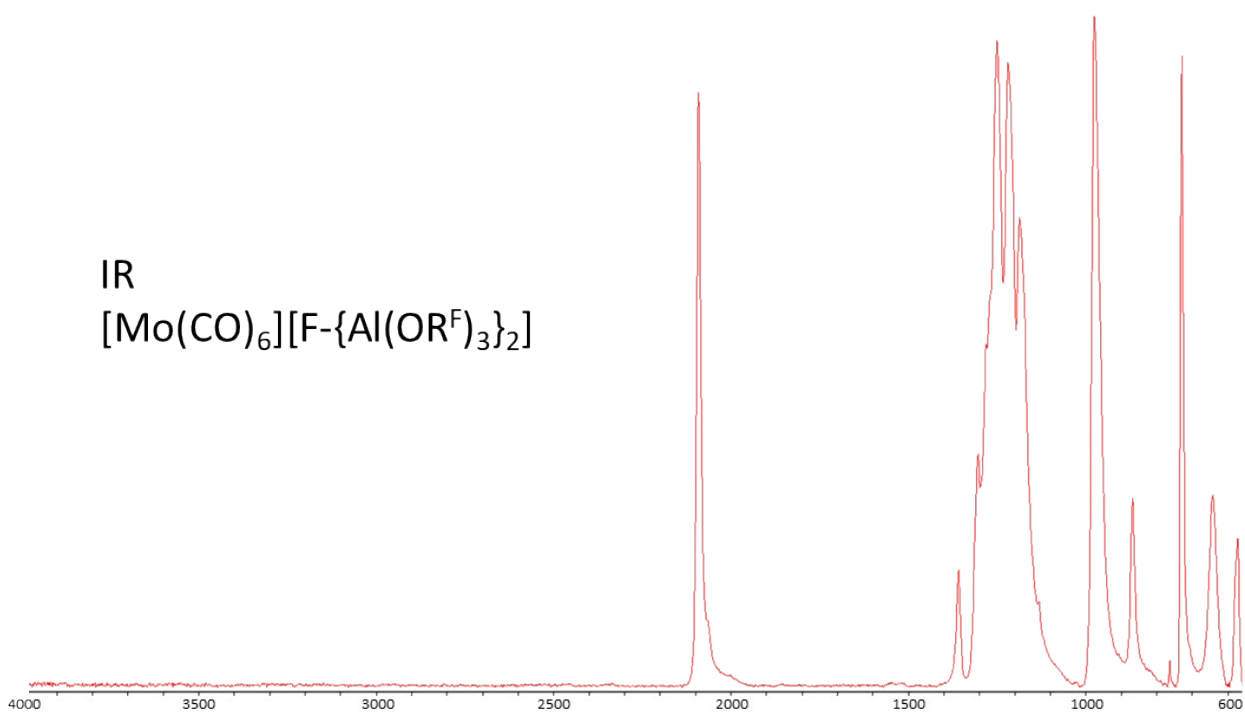

Supplementary Figure 16. Experimental IR spectrum of **3**.

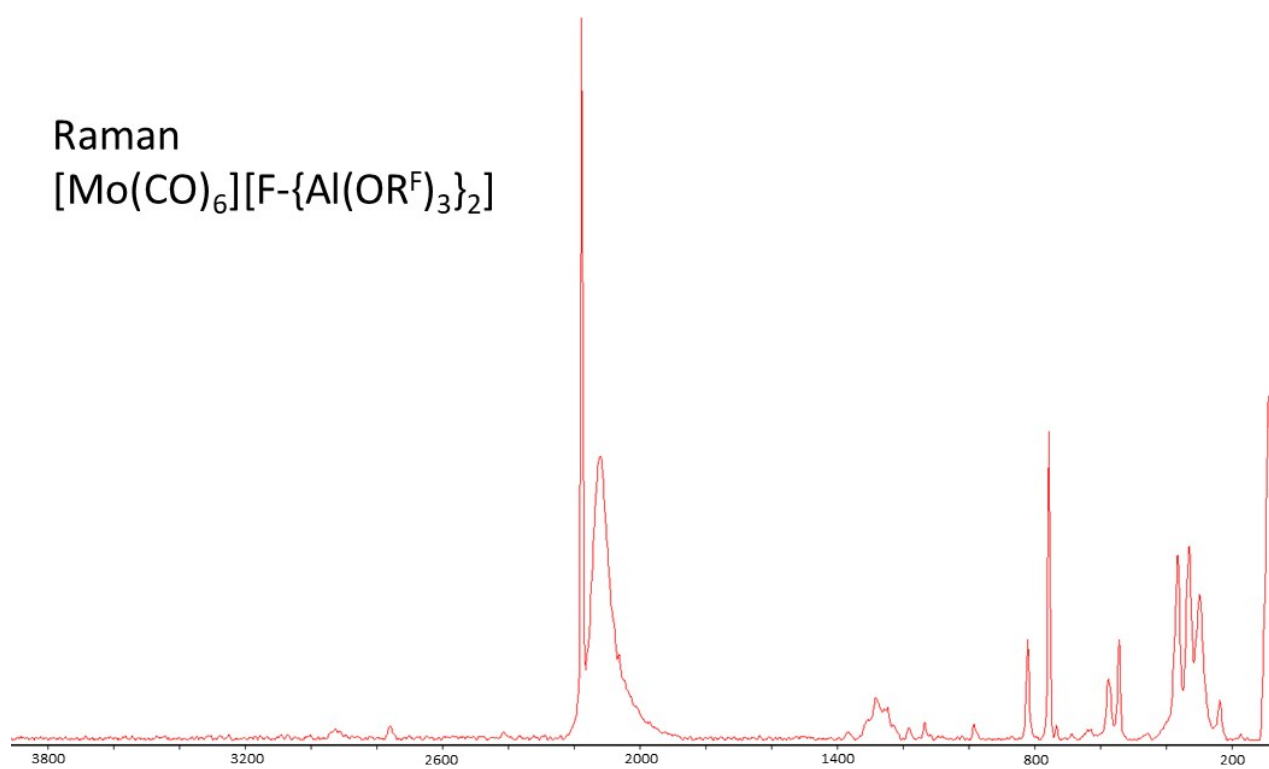

Supplementary Figure 17. Experimental Raman spectrum of **3**.

## Synthesis of $[\text{W}(\text{CO})_6][\text{F}-\{\text{Al}(\text{OR}^{\text{F}})_3\}_2]$ (4)

### Method A

$\text{I}_2$  (78.1 mg, 0.310 mmol, 1 eq) was added to a double-Schlenk tube. Inside the glovebox, first  $\text{Ag}[\text{Al}(\text{OR}^{\text{F}})_4]$  (667 mg, 0.620 mmol, 2 eq) and afterwards  $\text{W}(\text{CO})_6$  (218 mg, 0.619 mmol, 2 eq) were added to the iodine. Upon contact of the solids, the formation of purple  $\text{Ag}/\text{I}_2$  species was observed. Then, about 4 mL of 1,2,3,4-tetrafluorobenzene (TFB) were added and the initially purple solution turned to a brown-green suspension over the course of a few minutes of stirring at room temperature. After 10 minutes, a brownish-green suspension was formed and yellow  $\text{AgI}$  precipitate was visible. The reaction mixture was stirred overnight and eventually a dark green solution was obtained which was filtered to remove the  $\text{AgI}$ . Subsequent crystallization by vapour-diffusion of *n*-pentane into the TFB solution over the course of five days led to the precipitation of grey amorphous solids as well as orange and yellow crystals. Those crystals were carefully transferred to a second double-Schlenk tube, dissolved again in TFB, and the clear-yellow solution was filtered and crystallized with *n*-pentane for a second time. After a few days, yellow block-shaped crystals of  $[\text{W}(\text{CO})_6][\text{F}-\{\text{Al}(\text{OR}^{\text{F}})_3\}_2]$  (4) and orange needles of  $[\text{W}(\text{CO})_6(\text{OC}(\text{CF}_3)_3)[\text{F}-\{\text{Al}(\text{OR}^{\text{F}})_3\}_2]$  were obtained. Very careful manual separation of both species can be achieved inside the glovebox.

### Method B

$\text{I}_2$  (49.5 mg, 0.195 mmol, 1 eq) was added to a double-Schlenk tube. Inside the glovebox, first  $\text{Ag}[\text{F}-\{\text{Al}(\text{OR}^{\text{F}})_3\}_2]$  (621 mg, 0.390 mmol, 2 eq) and afterwards  $\text{W}(\text{CO})_6$  (138 mg, 0.392 mmol, 2 eq) were added to the iodine. Upon contact of the solids, the formation of purple  $\text{Ag}/\text{I}_2$  species was observed. Then, about 4 mL of 1,2,3,4-tetrafluorobenzene (TFB) were added at 0 °C and the initially purple solution turned to a yellow suspension over the course of a few minutes of stirring. After two hours at 0 °C, the dark-yellowish reaction mixture was allowed to reach RT overnight and eventually a dark green solution with yellow precipitate was obtained which then was filtered to remove the  $\text{AgI}$ . Subsequent crystallization by vapour-diffusion of *n*-pentane into the TFB solution over the course of five days led to the precipitation of grey amorphous solids as well as orange and yellow crystals. Those crystals were carefully and manually sorted inside the glovebox, whereas only the yellow block-shaped crystals were transferred to a second double-Schlenk tube, dissolved again in TFB, and the very dark to purple solution was

filtered and crystallized with *n*-pentane for a second time. After a few days, yellow block-shaped crystals of  $[\text{W}(\text{CO})_6][\text{F}-\{\text{Al}(\text{OR}^{\text{F}})_3\}_2]$  (4) were obtained. Yield: 35%.

*Note:* The  $\text{Ag}[\text{WCA}]$  should be added first to the iodine in order to physically separate the  $\text{W}(\text{CO})_6$  from the  $\text{I}_2$  before the solvent is added.

**FTIR** (ZnSe, ATR):  $\tilde{\nu}/\text{cm}^{-1}$  (intensity) = (2117 (vvw)), 2075 (vvs), 1355 (vw), 1301 (mw), 1277 (m), 1247 (vvs), 1215 (vvs), 1183 (s), 1129 (vw), 972 (vvs), 865 (w), 760 (vvw), 726 (vvs), 638 (w), 568 (w).

**FT Raman** (1000 scans, 100 mW,  $4 \text{ cm}^{-1}$ ):  $\tilde{\nu}/\text{cm}^{-1}$  (intensity) = 2174 (vvs), 2075 (vvw), 1879 (vvw), 1276 (vvw), 1088 (vvw), 983 (vvw), 818 (vw), 753 (m), 572 (vvw), 539 (vw), 393 (mw), 370 (vvw), 345 (vvw), 327 (w), 293 (vvw), 233 (vvw), 170 (vvw), 88 (s).

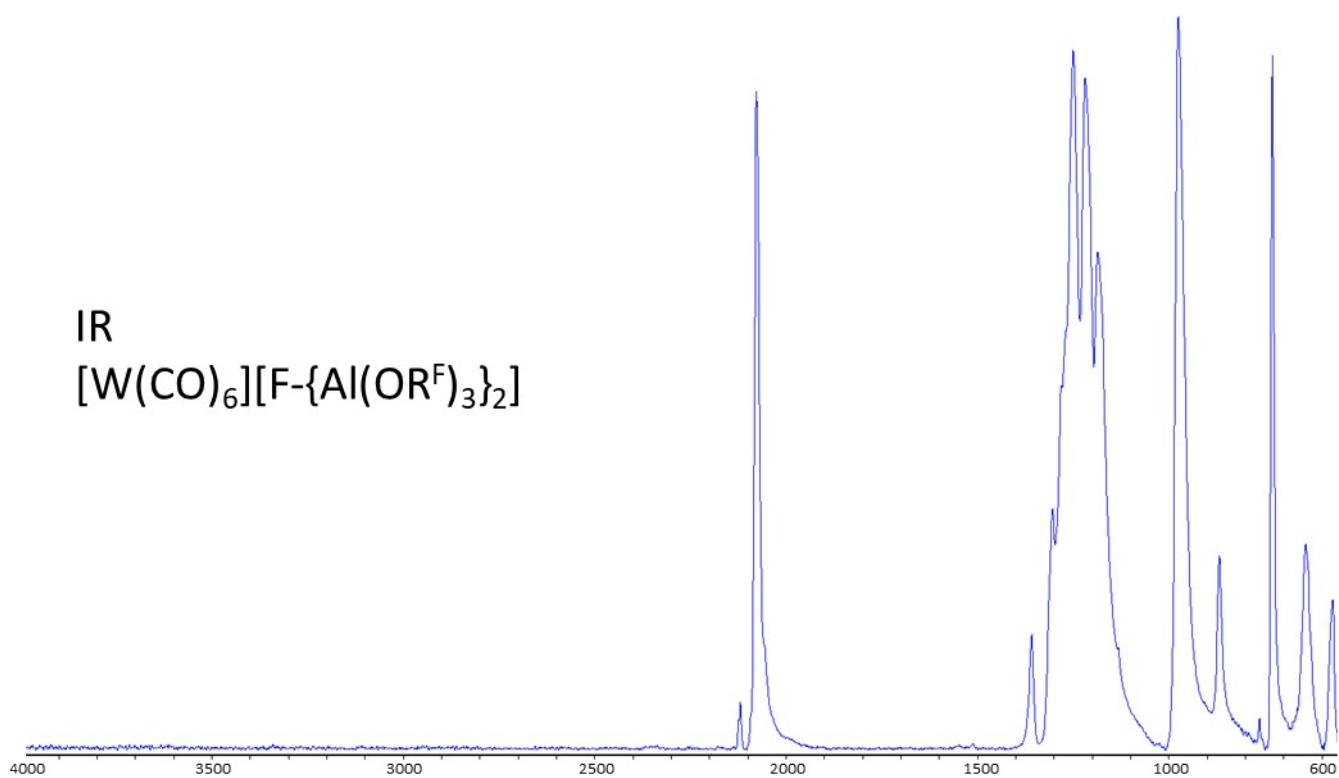

Supplementary Figure 18. Experimental IR spectrum of **4**.

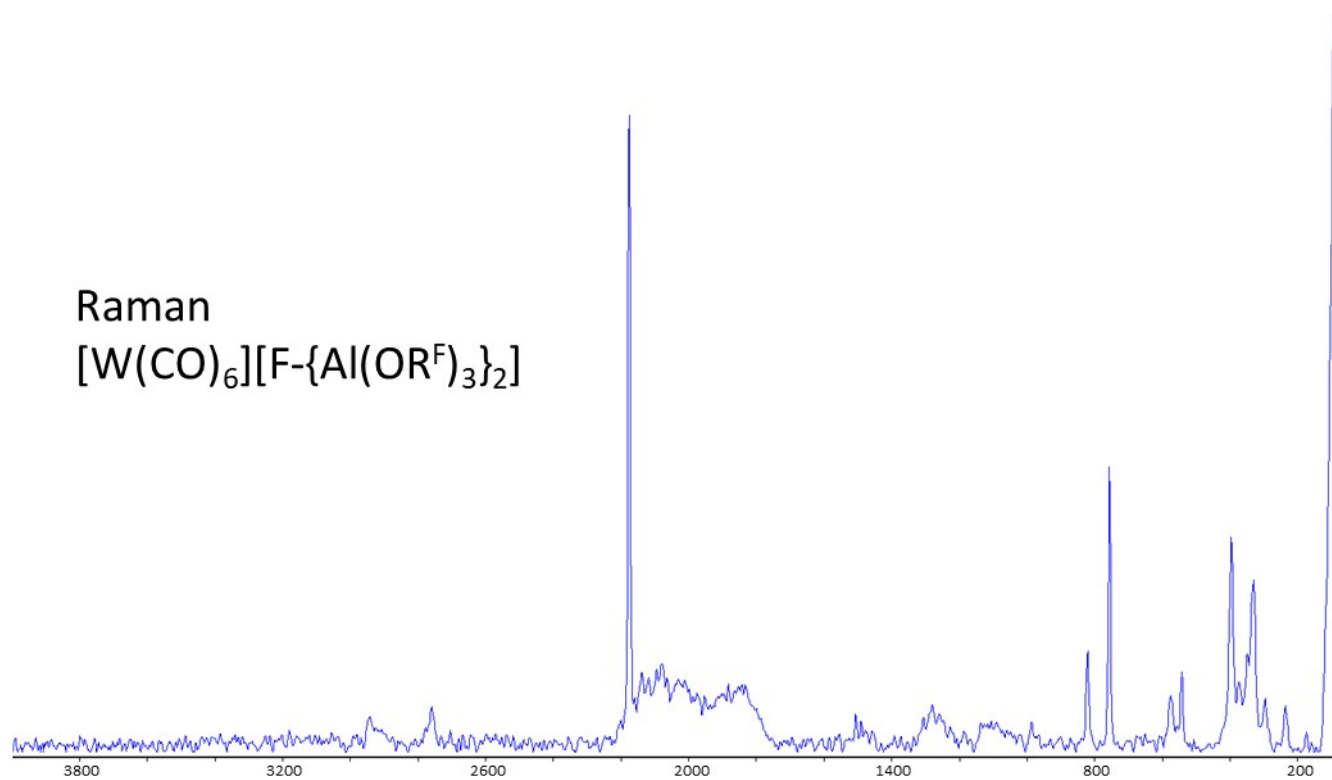

Supplementary Figure 19. Experimental Raman spectrum of **4**.

## 4. Vibrational Analysis

Supplementary Table 1. Full assignment of all IR and Raman vibrations for complexes **1** and **2**.

| [Mo(CO) <sub>5</sub> (NO)]<br>[Al(OR <sup>F</sup> ) <sub>4</sub> ] (1) |            | [W(CO) <sub>5</sub> (NO)]<br>[Al(OR <sup>F</sup> ) <sub>4</sub> ] (2) |            | [Mo(CO) <sub>5</sub> (NO)] <sup>+</sup> calcd. <sup>a)</sup> |            | [W(CO) <sub>5</sub> (NO)] <sup>+</sup><br>calcd. <sup>a)</sup> |            | [Al(OR <sup>F</sup> ) <sub>4</sub> ] <sup>-</sup> [34] |           | Assignment<br>[34,35] b)                     |
|------------------------------------------------------------------------|------------|-----------------------------------------------------------------------|------------|--------------------------------------------------------------|------------|----------------------------------------------------------------|------------|--------------------------------------------------------|-----------|----------------------------------------------|
| IR                                                                     | Raman      | IR                                                                    | Raman      | IR                                                           | Raman      | IR                                                             | Raman      | IR                                                     | Raman     |                                              |
|                                                                        | 101 (vs)   |                                                                       | 106 (vs)   |                                                              | 78 (vvs)   |                                                                | 84 (vvs)   |                                                        |           | <i>δ</i> (Mo–C) <i>E</i>                     |
|                                                                        | 234 (vvw)  |                                                                       | 234 (vvw)  |                                                              |            |                                                                |            |                                                        | 233 (w)   | <i>δ</i> (W–C) <i>E</i>                      |
|                                                                        | 289 (vvw)  |                                                                       |            |                                                              |            |                                                                |            |                                                        | 291 (w)   | - [Anion]                                    |
|                                                                        |            |                                                                       |            |                                                              | 327 (vvw)  |                                                                |            |                                                        |           | <i>ν</i> (Mo–C) <i>A</i> <sub>1</sub>        |
|                                                                        |            |                                                                       |            |                                                              |            |                                                                | 333 (vvw)  |                                                        |           | <i>ν</i> (W–C) <i>A</i> <sub>1</sub>         |
|                                                                        | 329 (vvw)  |                                                                       | 321 (vvw)  |                                                              |            |                                                                |            |                                                        | 322 (s)   | C–C, Al–O                                    |
|                                                                        |            |                                                                       |            |                                                              |            |                                                                | 349 (vvw)  |                                                        |           | <i>ν</i> (W–C) <i>E</i>                      |
|                                                                        |            |                                                                       |            |                                                              | 356 (vvw)  |                                                                |            |                                                        |           | <i>ν</i> (Mo–C) <i>E</i>                     |
|                                                                        | 363 (vvw)  |                                                                       | 374 (vvw)  |                                                              |            |                                                                |            |                                                        | 369 (w)   | C–C, C–F,<br>Al–O                            |
|                                                                        |            |                                                                       |            |                                                              |            |                                                                | 384 (vw)   |                                                        |           | <i>ν</i> (Mo–C) <i>A</i> <sub>1</sub>        |
|                                                                        |            |                                                                       |            |                                                              |            |                                                                |            |                                                        | 389 (vvw) | <i>ν</i> (W–C) <i>B</i> <sub>1</sub>         |
|                                                                        |            |                                                                       | 393 (vvw)  |                                                              |            |                                                                |            |                                                        | 404 (w)   | <i>ν</i> (W–C) <i>A</i> <sub>1</sub>         |
|                                                                        | 473 (vvw)  |                                                                       |            |                                                              | 485 (vw)   |                                                                |            |                                                        |           | <i>ν</i> (Mo–N) <i>A</i> <sub>1</sub>        |
|                                                                        |            |                                                                       | 492 (vvw)  |                                                              |            |                                                                |            |                                                        | 498 (vw)  | <i>ν</i> (W–N) <i>A</i> <sub>1</sub>         |
|                                                                        |            |                                                                       |            |                                                              | 521 (vvw)  |                                                                |            |                                                        | 524 (vvw) | <i>δ</i> (C–O) <i>E</i>                      |
|                                                                        |            |                                                                       |            |                                                              |            |                                                                |            |                                                        |           | C–C, C–O,                                    |
|                                                                        | 538 (vvw)  |                                                                       | 546 (w)    | 570 (vvw)                                                    | 570 (vw)   | 537 (vvw)                                                      | 537 (vw)   |                                                        | 538 (mw)  | <i>δ</i> (C–O) <i>A</i> <sub>1</sub>         |
|                                                                        |            |                                                                       |            |                                                              |            |                                                                |            |                                                        |           | <i>ν</i> (Mo–N) <i>A</i> <sub>1</sub>        |
|                                                                        |            |                                                                       |            |                                                              |            |                                                                |            |                                                        |           | <i>ν</i> (W–N) <i>A</i> <sub>1</sub>         |
| 560 (mw)                                                               | 564 (vw)   | 561 (w)                                                               |            |                                                              |            |                                                                |            | 559 (mw)                                               | 561 (w)   | Al–O, C–C                                    |
|                                                                        |            | 572 (vvw)                                                             |            |                                                              |            |                                                                |            | 573 (w)                                                | 572 (w)   | Al–O, C–C                                    |
| 617 (w)                                                                |            | 604 (vw)                                                              |            | 630 (vvw)                                                    |            | 603 (vvw)                                                      |            |                                                        |           | <i>δ</i> (N–O) <i>E</i>                      |
| 726 (vvs)                                                              |            | 726 (vvs)                                                             |            |                                                              |            |                                                                |            |                                                        | 726 (ms)  | C–C, C–O                                     |
|                                                                        | 747 (vvw)  |                                                                       | 747 (vvw)  |                                                              |            |                                                                |            |                                                        | 744 (ms)  | - [Anion]                                    |
| 756 (vw)                                                               |            | 756 (vvw)                                                             |            |                                                              |            |                                                                |            |                                                        | 755 (w)   | C–C, C–O                                     |
|                                                                        | 798 (vvw)  |                                                                       | 797 (vvw)  |                                                              |            |                                                                |            |                                                        | 799 (ms)  | - [Anion]                                    |
| 831 (w)                                                                |            | 831 (vw)                                                              |            |                                                              |            |                                                                |            |                                                        | 830 (m)   | Al–O, C–C                                    |
|                                                                        |            | 859 (vvw) <sup>c)</sup>                                               |            |                                                              |            |                                                                |            |                                                        |           |                                              |
| 969 (vvs)                                                              | 977 (vvw)  | 970 (vvs)                                                             | 978 (vvw)  |                                                              |            |                                                                |            | 975 (vs)                                               | 975 (mw)  | C–C, C–F                                     |
| 1139 (vvw)                                                             |            | 1138 (vvw)                                                            |            |                                                              |            |                                                                |            |                                                        | 1133 (mw) | C–C, C–F                                     |
| 1160 (mw)                                                              |            | 1163 (w)                                                              |            |                                                              |            |                                                                |            | 1176 (ms)                                              | 1173 (mw) | C–C, C–F                                     |
| 1208 (vvs)                                                             |            | 1209 (vs)                                                             |            |                                                              |            |                                                                |            | 1223 (vs)                                              |           | C–C, C–F                                     |
| 1239 (vvw)                                                             |            | 1239 (vvw)                                                            |            |                                                              |            |                                                                |            | 1236 (vs)                                              | 1237 (mw) | C–C, C–F                                     |
| 1266 (vvw)                                                             | 1271 (vvw) | 1273 (vw)                                                             | 1271 (vvw) |                                                              |            |                                                                |            | 1274 (s)                                               | 1276 (mw) | C–C, C–F                                     |
| 1297 (vvw)                                                             |            | 1298 (vvw)                                                            |            |                                                              |            |                                                                |            | 1299 (s)                                               |           | C–C, C–F                                     |
| 1352 (w)                                                               |            | 1352 (vw)                                                             |            |                                                              |            |                                                                |            | 1349 (ms)                                              | 1353 (w)  | C–C, C–F                                     |
| 1786 (vvw)*                                                            |            |                                                                       |            |                                                              |            |                                                                |            |                                                        |           |                                              |
| 1820 (s)                                                               | 1825 (vvw) | 1818 (ms)                                                             | 1823 (vvw) | 1877 (m)                                                     | 1877 (vvw) | 1868 (m)                                                       | 1868 (vvw) |                                                        |           | <i>ν</i> (N–O) <i>A</i> <sub>1</sub>         |
| 2070 (vvw)                                                             | 2071 (vvw) | 2059 (vw)                                                             | 2061 (vvw) |                                                              |            |                                                                |            |                                                        |           | <i>ν</i> ( <sup>13</sup> C–O)<br><i>E</i> ** |
| 2099 (vvs)                                                             | 2106 (vvw) | 2090 (vs)                                                             | 2095 (vvw) | 2078 (vvs)                                                   |            | 2070 (vvs)                                                     |            |                                                        |           | <i>ν</i> (C–O) <i>E</i>                      |
| 2124 (vvw)                                                             | 2124 (vvs) | 2113 (vvw)                                                            | 2114 (vvs) |                                                              | 2092 (vw)  |                                                                | 2086 (w)   |                                                        |           | <i>ν</i> (C–O) <i>B</i> <sub>1</sub>         |
| 2162 (vw)                                                              | 2163 (m)   | 2153 (vw)                                                             | 2155 (m)   | 2121 (vvw)                                                   | 2121 (vw)  | 2114 (vvw)                                                     | 2114 (vw)  |                                                        |           | <i>ν</i> (C–O) <i>A</i> <sub>1</sub>         |
| 2186 (w)                                                               | 2187 (mw)  | 2183 (vw)                                                             | 2184 (m)   | 2162 (vvw)                                                   | 2162 (vw)  | 2160 (vvw)                                                     | 2160 (vw)  |                                                        |           | <i>ν</i> (C–O) <i>A</i> <sub>1</sub>         |

<sup>a)</sup> BP86-D3BJ/def2-TZVPP, *C<sub>4v</sub>* symmetry, **no scale factor was applied**. w: weak, m: medium, s: strong, v: very, sh: shoulder, br: broad.

<sup>b)</sup> The assignments of the respective anion bands and their intensities are based on [N(Bu)<sub>4</sub>][Al(OR<sup>F</sup>)<sub>4</sub>] (IR and Raman) in ref.<sup>[34]</sup> and [CBR<sub>3</sub>][F–{Al(OR<sup>F</sup>)<sub>3</sub>}<sub>2</sub>] (IR only) in ref.<sup>[35]</sup>. The characteristic IR bands that are suited best for differentiation between [Al(OR<sup>F</sup>)<sub>4</sub>]<sup>-</sup> and [F–{Al(OR<sup>F</sup>)<sub>3</sub>}<sub>2</sub>]<sup>-</sup> are given in italics; in Raman spectroscopy, the difference is subtle and shows best in the (roughly) 1:1 intensity of the bands at 747 and 795 cm<sup>-1</sup> ([Al(OR<sup>F</sup>)<sub>4</sub>]<sup>-</sup>) compared to a (roughly) 1:3 intensity for the bands at 753 and 817 cm<sup>-1</sup> ([F–{Al(OR<sup>F</sup>)<sub>3</sub>}<sub>2</sub>]<sup>-</sup>).

<sup>c)</sup> Probably a small contamination with [F–{Al(OR<sup>F</sup>)<sub>3</sub>}<sub>2</sub>]<sup>-</sup>, although no impurities were visible in <sup>19</sup>F NMR.

\* Shoulder of unknown impurity or <sup>13</sup>C-influenced N–O vibration. However, the difference between [Mo/W(<sup>13</sup>CO)<sub>5</sub>(NO)]<sup>+</sup> and [Mo/W(<sup>12</sup>CO)<sub>5</sub>(NO)]<sup>+</sup> is only a few cm<sup>-1</sup> for the *A*<sub>1</sub> *ν*(N–O).

\*\* The difference of the *E* *ν*(C–O) vibration in [Mo/W(<sup>13</sup>CO)<sub>5</sub>(NO)]<sup>+</sup> and [Mo/W(<sup>12</sup>CO)<sub>5</sub>(NO)]<sup>+</sup> is about 45 cm<sup>-1</sup>.

Supplementary Table 2. Full assignment of all IR and Raman vibrations for complexes 3 and 4.

| [Mo(CO) <sub>6</sub> ][F- $\{Al(OR^F)_3\}_2$ ]<br>(3) |               | [W(CO) <sub>6</sub> ][F- $\{Al(OR^F)_3\}_2$ ]<br>(4) |                              | [Mo(CO) <sub>6</sub> ] <sup>+</sup> calcd. <sup>a)</sup> |           | [W(CO) <sub>6</sub> ] <sup>+</sup> calcd. <sup>a)</sup> |           | [F- $\{Al(OR^F)_3\}_2$ ]<br>[35] | Assignment<br>[34,35] b) |
|-------------------------------------------------------|---------------|------------------------------------------------------|------------------------------|----------------------------------------------------------|-----------|---------------------------------------------------------|-----------|----------------------------------|--------------------------|
| IR                                                    | Raman         | IR                                                   | Raman                        | IR                                                       | Raman     | IR                                                      | Raman     | IR                               |                          |
|                                                       | 84 (vvs)      |                                                      | 88 (s)                       |                                                          | 76 (vvs)  |                                                         | 77        |                                  | $\delta(Mo-C) E_g$       |
|                                                       | 112 (vvs)     |                                                      | 174 (vvw)                    |                                                          |           |                                                         |           |                                  | $\delta(W-C) E_g$        |
|                                                       |               |                                                      | 233 (vw)                     |                                                          |           |                                                         |           |                                  | C-C                      |
|                                                       | 233 (vww)     |                                                      | 293 (vww)                    |                                                          |           |                                                         |           |                                  | C-C                      |
|                                                       | 294 (vw)      |                                                      | 327 (w)                      |                                                          |           |                                                         |           |                                  | C-C, Al-O                |
|                                                       | 325 (w)       |                                                      |                              |                                                          |           |                                                         | 340 (vww) |                                  | *C-C, Al-O               |
|                                                       |               |                                                      |                              |                                                          |           |                                                         |           |                                  | $\nu(W-C) E_u$           |
|                                                       |               |                                                      |                              |                                                          | 344 (vww) |                                                         |           |                                  | $\nu(Mo-C) A_{2u}$       |
|                                                       |               |                                                      |                              |                                                          |           |                                                         |           |                                  | $\nu(Mo-C) E_u$          |
|                                                       |               |                                                      |                              |                                                          |           |                                                         | 347 (vww) |                                  | $\nu(Mo-C) E_g$          |
|                                                       |               |                                                      | 345 (vww)                    |                                                          |           |                                                         |           |                                  | $\nu(W-C) E_{1g}$        |
|                                                       | 361 (vw)      |                                                      |                              |                                                          |           |                                                         |           |                                  | $\nu(Mo-C) A_{1g}$       |
|                                                       |               |                                                      | 393 (mw)                     |                                                          |           |                                                         |           |                                  | $\nu(W-C) A_{1g}$        |
|                                                       |               |                                                      |                              |                                                          |           |                                                         | 403 (vw)  |                                  | $\delta(C-O) A_{1g}$     |
|                                                       |               |                                                      |                              |                                                          |           |                                                         | 416 (vww) |                                  | $\delta(C-O) A_{2u}$     |
|                                                       |               |                                                      |                              |                                                          |           |                                                         |           |                                  | $\delta(C-O) A_{2u}$     |
|                                                       | 539 (vw)      |                                                      | 540 (vw)                     |                                                          |           |                                                         |           |                                  | C-C, C-O                 |
|                                                       |               |                                                      |                              |                                                          |           |                                                         |           |                                  | $\delta(C-O) E_u$        |
|                                                       |               |                                                      |                              |                                                          |           |                                                         | 551 (vww) |                                  | $\delta(C-O) E_u$        |
|                                                       |               |                                                      |                              |                                                          |           |                                                         |           |                                  | $\delta(C-O) E_u$        |
| 568 (w)                                               | 572 (vww)     | 568 (w)                                              | 572 (vww)                    |                                                          |           |                                                         |           | 572 (m)                          | Al-O, C-C                |
| 638 (w)                                               |               | 638 (w)                                              |                              |                                                          |           |                                                         |           | 639 (m)                          | Al-F-Al                  |
| 726 (vvs)                                             | 730 (vww)     | 726 (vvs)                                            |                              |                                                          |           |                                                         |           | 728 (s)                          | C-C, C-O                 |
|                                                       | 753 (mw)      |                                                      | 753 (m)                      |                                                          |           |                                                         |           |                                  | - [Anion]                |
| 760 (vww)                                             |               | 760 (vww)                                            |                              |                                                          |           |                                                         |           |                                  | C-C, C-O                 |
|                                                       |               |                                                      |                              |                                                          |           |                                                         |           |                                  | C-C, C-O                 |
|                                                       | 818 (mw)      |                                                      | 818 (vw)                     |                                                          |           |                                                         |           |                                  | - [Anion]                |
| 865 (w)                                               |               | 865 (w)                                              |                              |                                                          |           |                                                         |           | 865 (w)                          | Al-O, Al-F-Al            |
| 972 (vvs)                                             | 981 (vww)     | 972 (vvs)                                            | 983 (vww)                    |                                                          |           |                                                         |           | 975 (s)                          | C-C, C-F                 |
| 1129 (vw)                                             | 1131 (vww)    | 1129 (vw)                                            | 1088 (vww)                   |                                                          |           |                                                         |           |                                  | C-C, C-F                 |
| 1184 (vs)                                             | 1179 (vww)    | 1183 (s)                                             |                              |                                                          |           |                                                         |           | 1183 (m)                         | C-C, C-F                 |
| 1216 (vvs)                                            |               | 1215 (vvs)                                           |                              |                                                          |           |                                                         |           | 1218 (s)                         | C-C, C-F                 |
| 1247 (vvs)                                            |               | 1247 (vvs)                                           |                              |                                                          |           |                                                         |           | 1249 (s)                         | C-C, C-F                 |
| 1278 (ms)                                             | 1280 (vww)    | 1277 (m)                                             | 1276 (vww)                   |                                                          |           |                                                         |           | 1268 (m)                         | C-C, C-F                 |
| 1300 (mw)                                             |               | 1301 (mw)                                            |                              |                                                          |           |                                                         |           | 1301 (m)                         | C-C, C-F                 |
| 1355 (vw)                                             | 1365 (vww)    | 1355 (vw)                                            |                              |                                                          |           |                                                         |           | 1355 (m)                         | C-C, C-F                 |
| 2089 (vvs) <sup>d)</sup>                              |               | 2075 (vvs) <sup>d)</sup>                             |                              | 2072 (vvs)                                               |           | 2062 (vvs)                                              |           |                                  | $\nu(C-O) A_{2u}$        |
|                                                       |               |                                                      |                              |                                                          |           |                                                         |           |                                  | $\nu(C-O) E_u$           |
|                                                       |               |                                                      | 1879 (vww, br) <sup>e)</sup> |                                                          |           |                                                         |           |                                  | $\nu(C-O)$               |
|                                                       | 2118 (mw, br) | 2117 (vww) <sup>e)</sup>                             | 2075 (vww, br) <sup>e)</sup> |                                                          | 2074 (ms) |                                                         | 2064 (m)  |                                  | $\nu(C-O) E_g$           |
|                                                       | 2175 (vss)    |                                                      | 2174 (vvs)                   |                                                          | 2158 (vw) |                                                         | 2155 (vw) |                                  | $\nu(C-O) A_{1g}$        |

<sup>a)</sup> BP86-D3BJ/def2-TZVPP,  $D_{3d}$  symmetry, **no scale factor was applied**. w: weak, m: medium, s: strong, v: very, sh: shoulder, br: broad.

<sup>b)</sup> The assignments of the respective anion bands and their intensities are based on [N(Bu)<sub>4</sub>][Al(OR<sup>F</sup>)<sub>4</sub>] (IR and Raman) in ref.<sup>[34]</sup> and [CBR<sub>3</sub>][F- $\{Al(OR^F)_3\}_2$ ] (IR only) in ref.<sup>[35]</sup>. The characteristic IR bands that are suited best for differentiation between [Al(OR<sup>F</sup>)<sub>4</sub>]<sup>-</sup> and [F- $\{Al(OR^F)_3\}_2$ ]<sup>-</sup> are given in italics; in Raman spectroscopy, the difference is subtle and shows best in the (roughly) 1:1 intensity of the bands at 747 and 795 cm<sup>-1</sup> ([Al(OR<sup>F</sup>)<sub>4</sub>]<sup>-</sup>) compared to a (roughly) 1:3 intensity for the bands at 753 and 817 cm<sup>-1</sup> ([F- $\{Al(OR^F)_3\}_2$ ]<sup>-</sup>).

<sup>c)</sup> The additional band in the IR of [W(CO)<sub>6</sub>][F- $\{Al(OR^F)_3\}_2$ ] at 2117 cm<sup>-1</sup> is either the Raman-active  $E_g$  vibration or a contamination which coincidentally vibrates at that same wavenumber.

<sup>d)</sup> Small <sup>13</sup>C=O shoulders are visible in the spectrum.

<sup>e)</sup> The spectrum consists of two very broad bands that span over 300 cm<sup>-1</sup>.

\* Note: Due to partial overlap with the anion bands, the  $\nu(Mo-C) A_{2u}/E_u$  vibrations cannot be assigned unambiguously.

## Comparison of the CO vibrations

### Raman spectra of the neutral Cr/Mo/W(CO)<sub>6</sub> triad

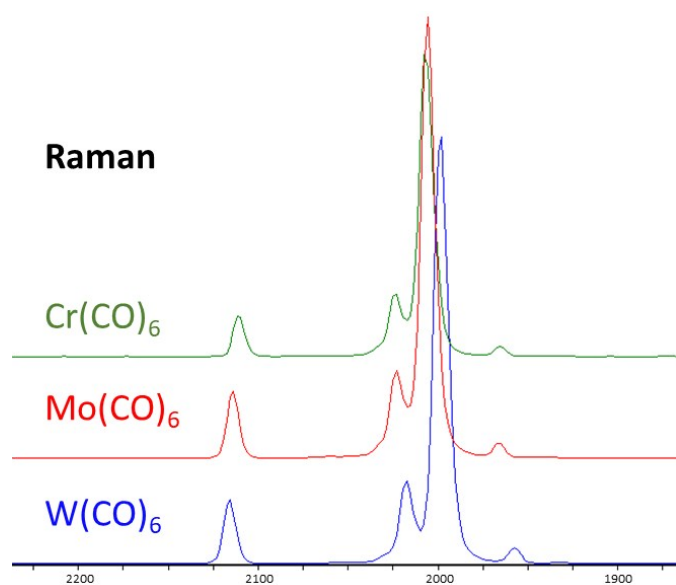

Supplementary Figure 20. Stacked Raman spectra of the neutral Cr/Mo/W(CO)<sub>6</sub> triad.

### Stacked Raman spectra of the cationic [Cr/Mo/W(CO)<sub>6</sub>]<sup>+</sup> triad

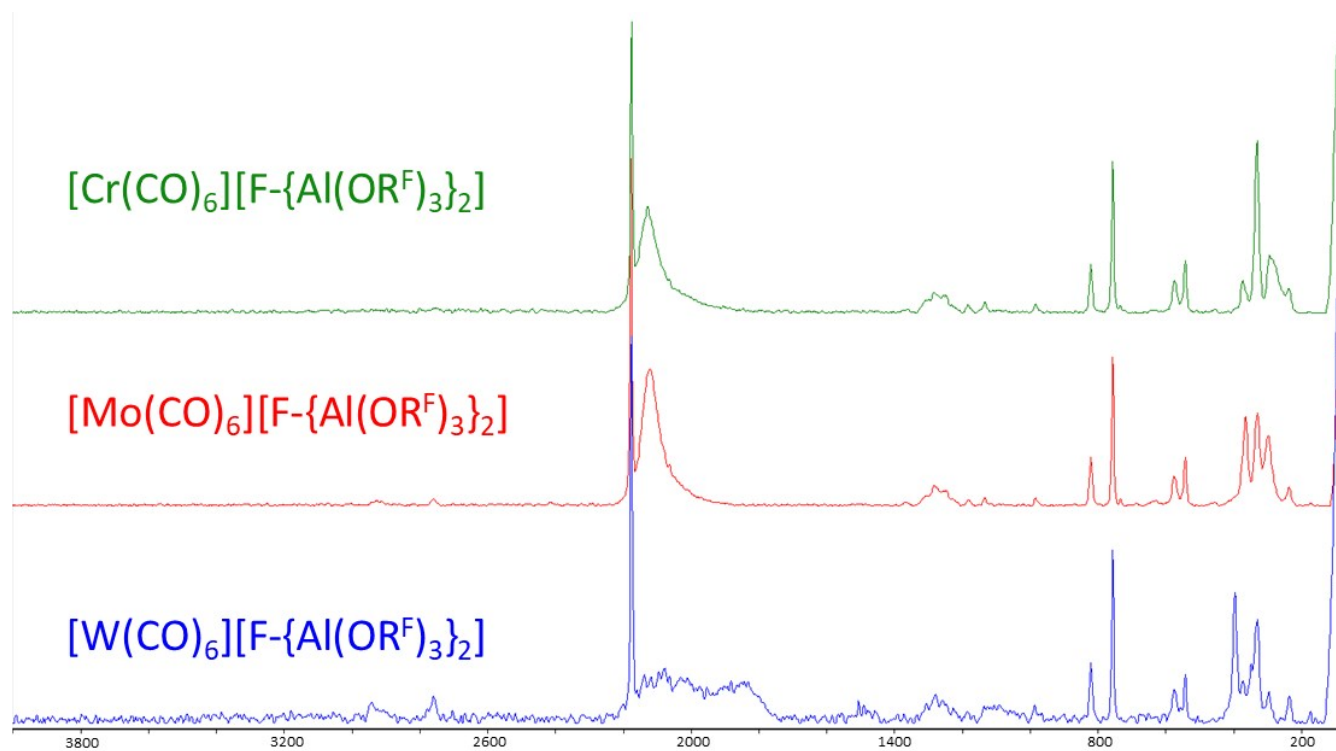

Supplementary Figure 21. Stacked Raman spectra of the cationic [Cr/Mo/W(CO)<sub>6</sub>]<sup>+</sup> triad.



## Discussion of the $D_{3d}/D_{2h}/D_{3d}$ fluctuation

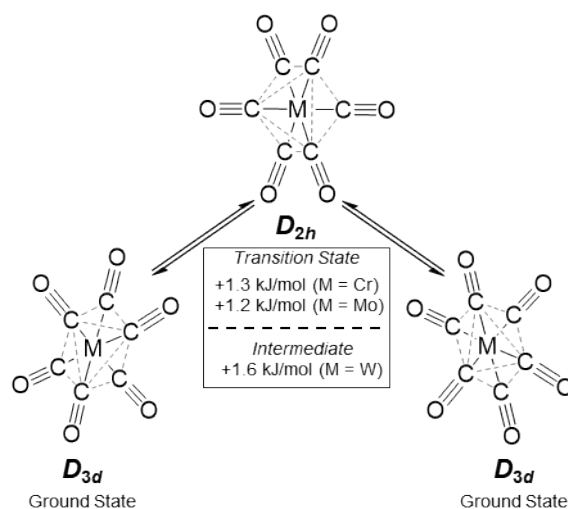

In order to evaluate our previous findings on the fluctuation of  $[\text{Cr}(\text{CO})_6]^+$ , we conducted an initial (pseudo-relaxed) energy surface scan (BP86-D3BJ/def2-SVP) along the two ‘*cis*’  $\text{C}_{\text{eq}}\text{-W-C}_{\text{ax}}$  angles for  $[\text{W}(\text{CO})_6]^+$  which only gave a reasonable output for *trans* C-W-C angles fixed at  $180^\circ$ . It gave a  $D_{2h}$ -symmetric transition state at about  $+4.5 \text{ kJ mol}^{-1}$  between two  $D_{3d}$  ground states (see picture below) which would be in agreement with our previous findings on the Cr system.

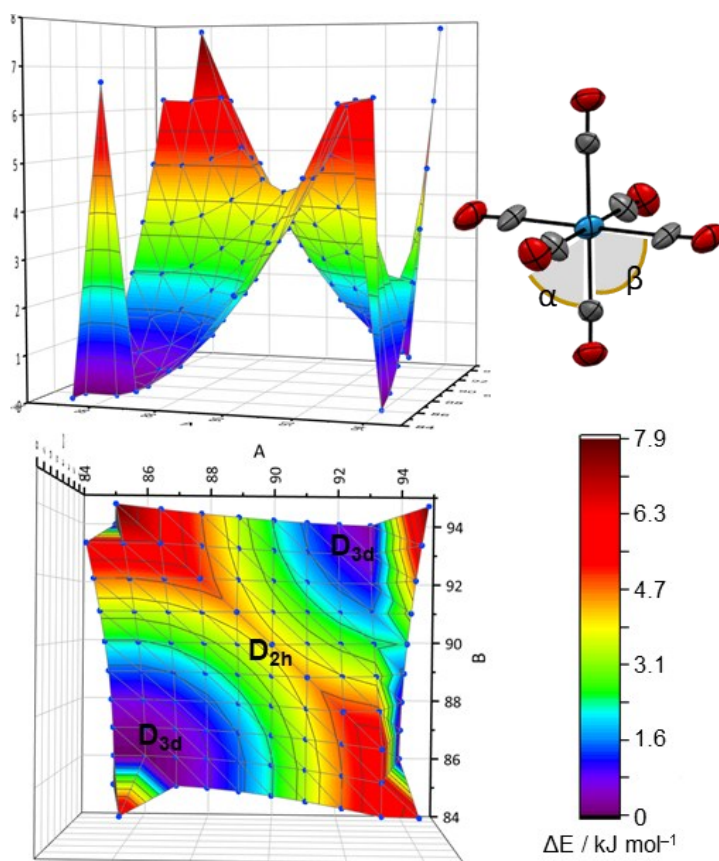

Supplementary Figure 22. Energy surface scan along two angles for  $[\text{W}(\text{CO})_6]^+$ .

However as we looked further into detail, single-point calculations with vibrational analysis of the alleged  $D_{2h}$  transition state showed no imaginary vibration. A geometry optimization without geometry restrictions (in  $C_1$ ) led to the  $D_{3d}$  ground state; a geometry optimization in  $D_{2h}$  led to a  $D_{2h}$  local minimum about +5 kJ mol<sup>-1</sup> above the  $D_{3d}$  structure.

On BP86-D3BJ/def2-TZVPP level of theory, the  $D_{2h}$  symmetric structure is also a local minimum for [W(CO)<sub>6</sub>]<sup>+</sup> (+9.5 kJ mol<sup>-1</sup>) and not a transition state any more. This is the same for [Mo(CO)<sub>6</sub>]<sup>+</sup> ( $D_{2h}$  +8.2 kJ mol<sup>-1</sup>) and Cr ( $D_{2h}$  +8.2 kJ mol<sup>-1</sup>).

As an alternative approach, an *ad hoc* QST2 transition state search for [Mo(CO)<sub>6</sub>]<sup>+</sup> between the two  $D_{3d}$  and  $D_{2h}$  structures failed with BP86.

We then conducted a third study with the TPSSh (D3BJ/def2-TZVPP) functional (that we also used in the [Cr(CO)<sub>6</sub>]<sup>+</sup> publication). Here, we found a  $D_{2h}$ -symmetric transition state (TS), that connected the two isomeric  $D_{3d}$  ground states, for Cr ( $D_{2h, TS}$  = +3.4 kJ mol<sup>-1</sup>) and Mo ( $D_{2h, TS}$  = +4.8 kJ mol<sup>-1</sup>). However, for W, the  $D_{2h}$  structure is again a local minimum (+4.8 kJ mol<sup>-1</sup>).

We then fed the TPSSh structures into a DPLNO-CCSD(T) calculation for more exact energetics.

|                                     | $\Delta E(D_{2h}-D_{3d})$ |                  |                        |                          |                  |
|-------------------------------------|---------------------------|------------------|------------------------|--------------------------|------------------|
|                                     | BP86-D3BJ/def2-TZVPP      | $D_{2h} =$<br>TS | TPSSh- D3BJ/def2-TZVPP | DPLNO-CCSD(T)/def2-TZVPP | $D_{2h} =$<br>TS |
| [Cr(CO) <sub>6</sub> ] <sup>+</sup> | +8.2                      | no               | +3.4                   | +1.3                     | yes              |
| [Mo(CO) <sub>6</sub> ] <sup>+</sup> | +9.0                      | no               | +4.8                   | +1.2                     | yes              |
| [W(CO) <sub>6</sub> ] <sup>+</sup>  | +9.5                      | no               | +4.8                   | +1.6                     | no               |

From these findings, we summarize and conclude the following:

- Although superficially similar, the electronic and structural fluctuations of [Cr/Mo/W(CO)<sub>6</sub>]<sup>+</sup> differ in their devilish details
- The structural differences for  $D_{3d}$  and  $D_{2h}$  are very small

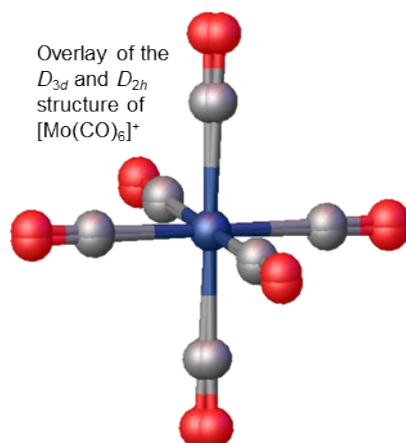

- c) The results and trends of the calculations are dependent on the software (Orca, Gaussian, Turbomole), functionals (TPSSH, BP86, ...) and basis set (SVP vs TZVPP) that we used
- d) Possible changes in the electronic occupation in the ground state and the possible transition states in these delicate systems highly complicate the calculations and might give different results.
- e) Two  $D_{3d}$ -Isomers for Cr and Mo equilibrate via a  $D_{2h}$  intermediate/transition state. We were unable to find a transition state for W between the  $D_{3d}$  and  $D_{2h}$  local minimum even with the TPSSH functional
- f) The coupled-cluster calculations based on the TPSSH-structures show that the energy-barrier between  $D_{3d}$ - $D_{2h}$ - $D_{3d}$  is small enough for a fast equilibration. One should note that the calculated small T1-diagnostic values around 0.02 suggest that the DPLNO-CCSD(T) give valid and reliable energies.

To summarize, a proper and correct description of these systems is very complex, especially since we got different results from different functionals and methods.

We believe that a thorough and large scale theoretical investigation carried out by expert specialists is needed and should be part of a future report.

## CO vibrations of all literature-known homoleptic hexacarbonyl complexes

Supplementary Table 3. CO vibrations of all literature-known homoleptic hexacarbonyl complexes, taken from [36] and references therein.

|                | Raman                                |       | IR                                          | Comment |                               |
|----------------|--------------------------------------|-------|---------------------------------------------|---------|-------------------------------|
|                | $A_{1g}$                             | $E_g$ | $E_u/A_{2u} (D_{3d}) / T_{1u}$<br>( $O_h$ ) |         |                               |
| <b>Gr. IV</b>  | [Ti(CO) <sub>6</sub> ] <sup>2-</sup> | -     | -                                           | 1748    | CH <sub>3</sub> CN solution   |
|                | [Zr(CO) <sub>6</sub> ] <sup>2-</sup> | -     | -                                           | 1757    | CH <sub>3</sub> CN solution   |
|                | [Hf(CO) <sub>6</sub> ] <sup>2-</sup> | -     | -                                           | 1757    | CH <sub>3</sub> CN solution   |
| <b>Gr. V</b>   | V(CO) <sub>6</sub>                   | 2102  | 2038                                        | 1984    | Ar-Matrix, 12K                |
|                | [V(CO) <sub>6</sub> ] <sup>-</sup>   | 2020  | 1894                                        | 1858    | CH <sub>3</sub> CN solution   |
|                | [Nb(CO) <sub>6</sub> ] <sup>-</sup>  | 2023  | 1885                                        | 1864    | Ra solid, IR acetone solution |
|                | [Ta(CO) <sub>6</sub> ] <sup>-</sup>  | 2025  | 1881                                        | 1859    | Ra solid, IR acetone solution |
| <b>Gr VI</b>   | Cr(CO) <sub>6</sub>                  | 2112  | 2018                                        | 1984    | CCl <sub>4</sub> solution     |
|                | Mo(CO) <sub>6</sub>                  | 2117  | 2019                                        | 1986    | CCl <sub>4</sub> solution     |
|                | W(CO) <sub>6</sub>                   | 2117  | 2010                                        | 1977    | CS <sub>2</sub> solution      |
|                | [Cr(CO) <sub>6</sub> ] <sup>+</sup>  | 2173  | 2128                                        | 2096    | Solid                         |
|                | [Mo(CO) <sub>6</sub> ] <sup>+</sup>  | 2174  | 2127                                        | 2089    | Solid                         |
|                | [W(CO) <sub>6</sub> ] <sup>+</sup>   | 2173  | 2128                                        | 2075    | Solid                         |
| <b>Gr VII</b>  | [Mn(CO) <sub>6</sub> ] <sup>+</sup>  | 2192  | 2125                                        | 2095    | CH <sub>3</sub> CN solution   |
|                | [Tc(CO) <sub>6</sub> ] <sup>+</sup>  | -     | -                                           | 2095    | CH <sub>3</sub> CN solution   |
|                | [Re(CO) <sub>6</sub> ] <sup>+</sup>  | 2197  | 2122                                        | 2085    | CH <sub>3</sub> CN solution   |
| <b>Gr VIII</b> | [Fe(CO) <sub>6</sub> ] <sup>2+</sup> | 2241  | 2220                                        | 2204    | Solid                         |
|                | [Ru(CO) <sub>6</sub> ] <sup>2+</sup> | 2254  | 2222                                        | 2199    | Solid                         |
|                | [Os(CO) <sub>6</sub> ] <sup>2+</sup> | 2259  | 2218                                        | 2190    | Solid                         |
| <b>Gr IX</b>   | [Ir(CO) <sub>6</sub> ] <sup>3+</sup> | 2295  | 2276                                        | 2254    | Solid                         |

## Comparison of Turbomole vs Gaussian calculations

Supplementary Table 4. Comparison of selected calculated stretch vibrations with Turbomole (TM) (BP86-D3BJ/def2-TZVPP) vs Gaussian (G) (BP86/def2-TZVPP).

|                                    | Cr(CO) <sub>6</sub> [Cr(CO) <sub>6</sub> ] <sup>+</sup> [Cr(CO) <sub>5</sub> (NO)] <sup>+</sup> |      |      | Mo(CO) <sub>6</sub> [Mo(CO) <sub>6</sub> ] <sup>+</sup> [Mo(CO) <sub>5</sub> (NO)] <sup>+</sup> |      |      | W(CO) <sub>6</sub> [W(CO) <sub>6</sub> ] <sup>+</sup> [W(CO) <sub>5</sub> (NO)] <sup>+</sup> |      |      |
|------------------------------------|-------------------------------------------------------------------------------------------------|------|------|-------------------------------------------------------------------------------------------------|------|------|----------------------------------------------------------------------------------------------|------|------|
| A <sub>1g</sub> CO TM              | 2104                                                                                            | 2158 | -    | 2106                                                                                            | 2158 | -    | 2104                                                                                         | 2155 | -    |
| A <sub>1g</sub> CO G               | 2098                                                                                            | 2152 | -    | 2100                                                                                            | 2151 | -    | 2098                                                                                         | 2148 | -    |
| E <sub>g</sub> CO TM               | 2015                                                                                            | 2074 | -    | 2013                                                                                            | 2074 | -    | 2008                                                                                         | 2067 | -    |
| E <sub>g</sub> CO G                | 2009                                                                                            | 2067 | -    | 2007                                                                                            | 2068 | -    | 2002                                                                                         | 2061 | -    |
| A <sub>2u</sub> /E <sub>u</sub> TM | 1994                                                                                            | 2080 | -    | 1990                                                                                            | 2073 | -    | 1985                                                                                         | 2062 | -    |
| A <sub>2u</sub> /E <sub>u</sub> G  | 1988                                                                                            | 2077 | -    | 1985                                                                                            | 2065 | -    | 1980                                                                                         | 2056 | -    |
| A <sub>1</sub> NO TM               | -                                                                                               | -    | 1903 | -                                                                                               | -    | 1877 | -                                                                                            | -    | 1868 |
| A <sub>1</sub> NO G                | -                                                                                               | -    | 1895 | -                                                                                               | -    | 1870 | -                                                                                            | -    | 1861 |
| E CO TM                            | -                                                                                               | -    | 2085 | -                                                                                               | -    | 2078 | -                                                                                            | -    | 2070 |
| E CO G                             | -                                                                                               | -    | 2079 | -                                                                                               | -    | 2072 | -                                                                                            | -    | 2064 |
| A <sub>1</sub> M-C TM              | 406                                                                                             | 364  | -    | 418                                                                                             | 385  | -    | 435                                                                                          | 403  | -    |
| A <sub>1</sub> M-C G               | 401                                                                                             | 358  | -    | 414                                                                                             | 381  | -    | 431                                                                                          | 400  | -    |
| A <sub>1</sub> M-N TM              | -                                                                                               | -    | 667  | -                                                                                               | -    | 570  | -                                                                                            | -    | 537  |
| A <sub>1</sub> M-N G               | -                                                                                               | -    | 662  | -                                                                                               | -    | 566  | -                                                                                            | -    | 535  |
| A <sub>1</sub> M-N TM              | -                                                                                               | -    | 506  | -                                                                                               | -    | 485  | -                                                                                            | -    | 498  |
| A <sub>1</sub> M-N G               | -                                                                                               | -    | 503  | -                                                                                               | -    | 484  | -                                                                                            | -    | 497  |

## 5. EPR Spectrum and simulation of the Impurity found in the sample of **3**

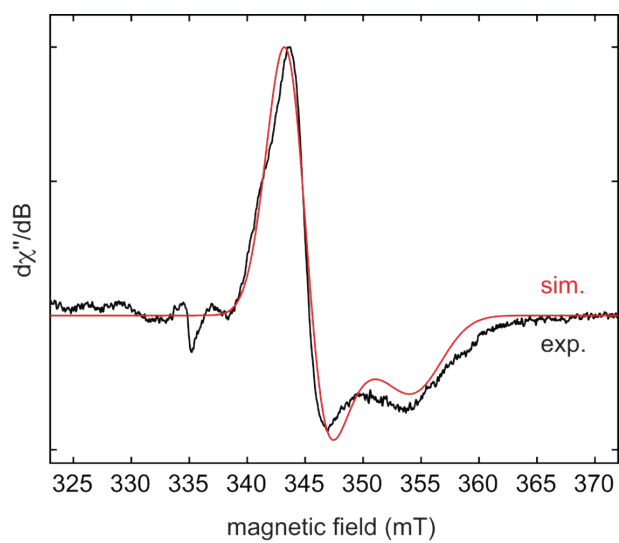

Supplementary Figure 23: Experimental and simulated EPR spectra of the small impurity present in **3** at 100 K. Simulation parameters:  $g_{\perp} = 1.948$ ,  $g_{\parallel} = 1.891$ .

## 6. Powder XRD Data

In order to evaluate the phase purity of the bulk materials **1**, **2**, **3** and **4**, powder XRD measurements were conducted at 100K. They confirm the absence of crystalline impurities for both bulk materials.

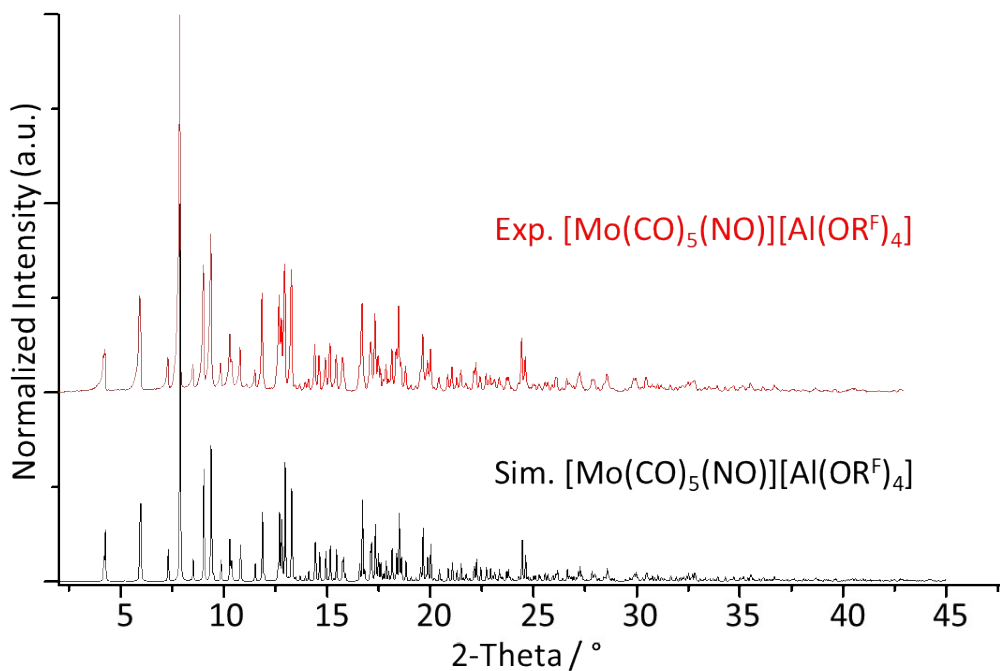

Supplementary Figure 24. Experimental (Exp., red) and simulated (Sim., black) powder XRD diffractogram of **1**.

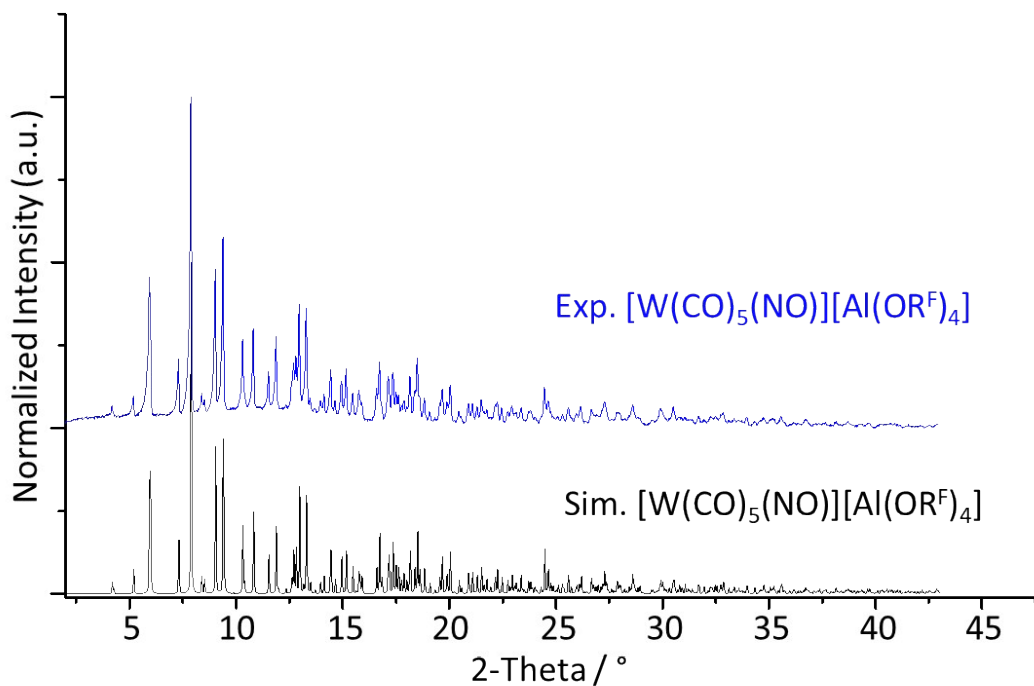

Supplementary Figure 25. Experimental (Exp., blue) and simulated (Sim., black) powder XRD diffractogram of **2**.

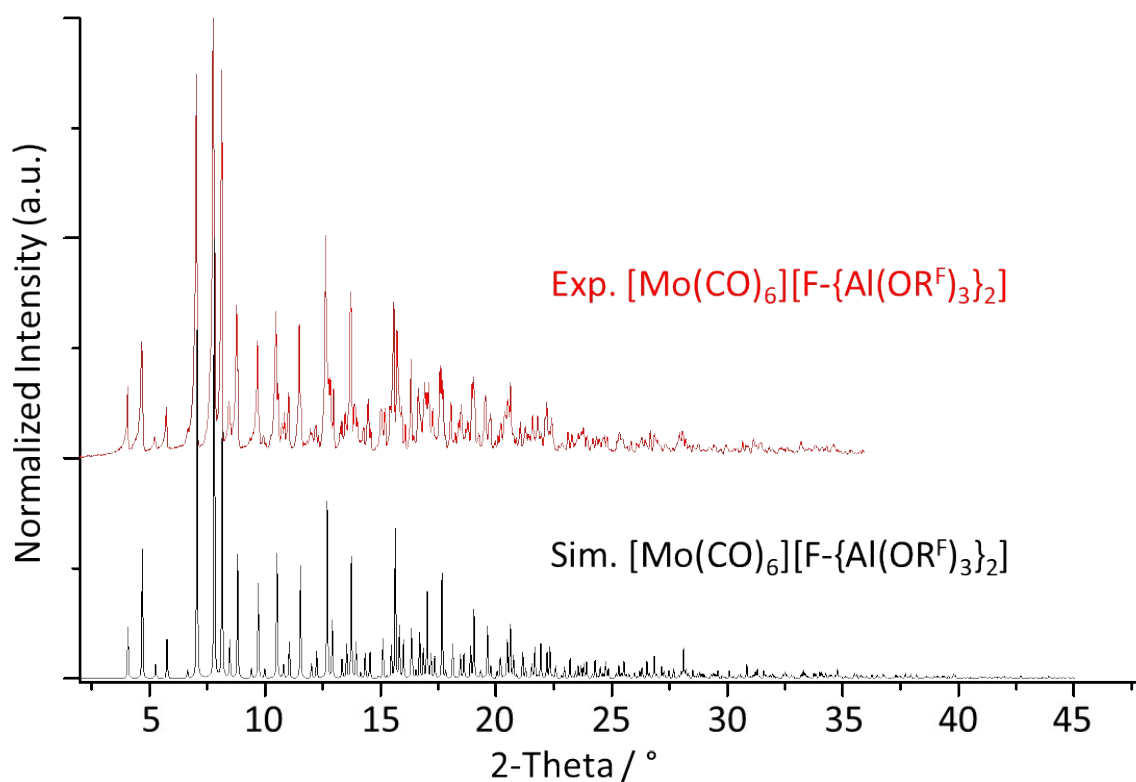

Supplementary Figure 26. Experimental (Exp., red) and simulated (Sim., black) powder XRD diffractogram of 3.

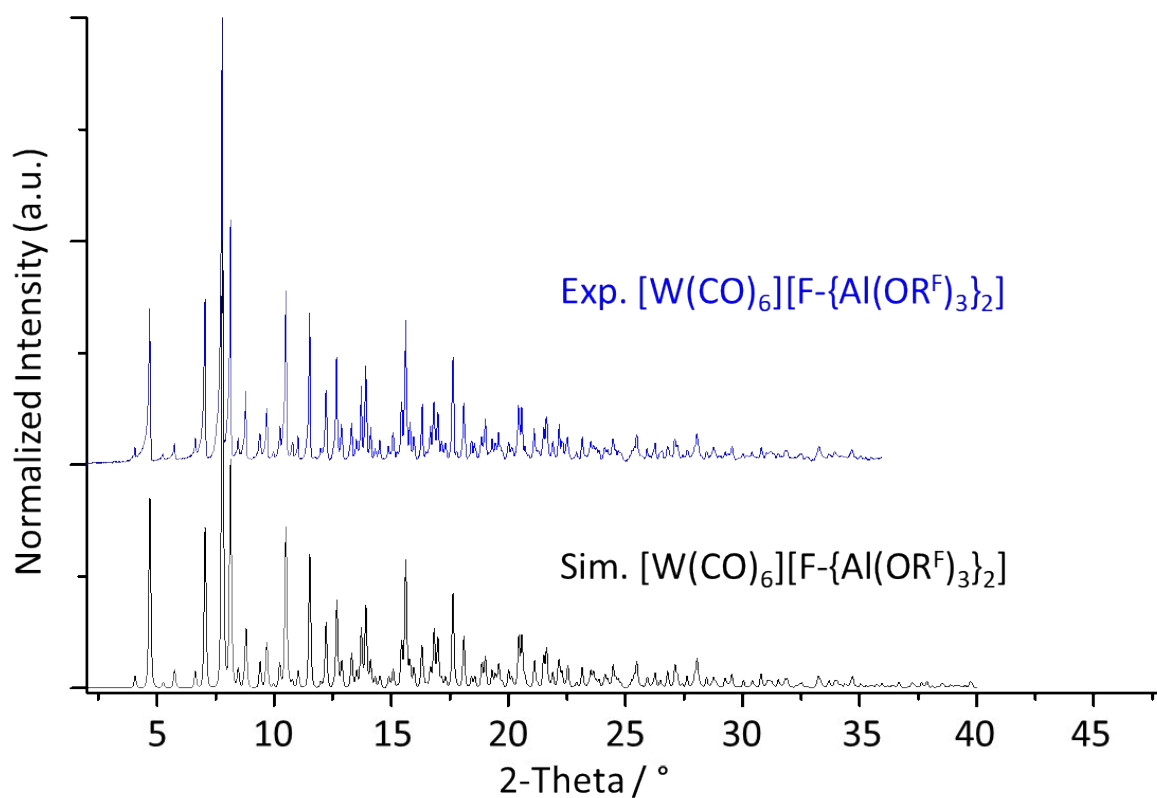

Supplementary Figure 27. Experimental (Exp., blue) and simulated (Sim., black) powder XRD diffractogram of 4.



## 7. Single-Crystal XRD Data of Compounds 1 to 4

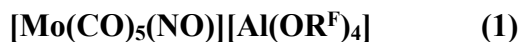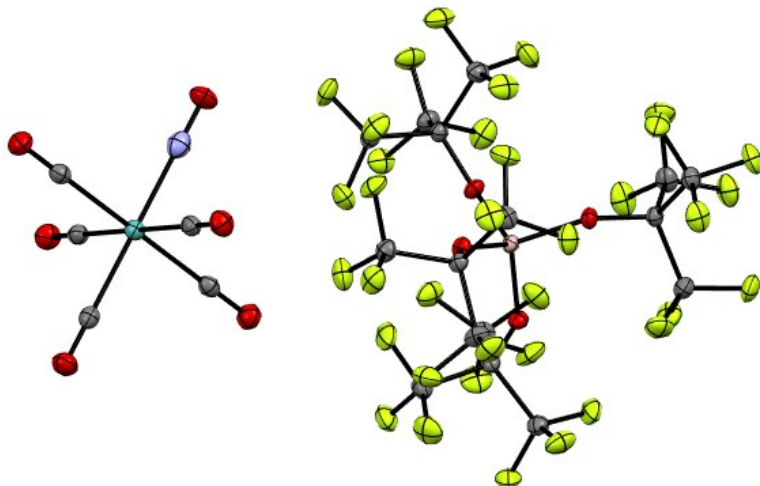

**Table 1 Crystal data and structure refinement for p4n\_a.**

|                                               |                                                               |
|-----------------------------------------------|---------------------------------------------------------------|
| CCDC Deposition Number                        | 1952379                                                       |
| Identification code                           | p4n_a                                                         |
| Empirical formula                             | $\text{C}_{21}\text{NO}_{10}\text{F}_{36}\text{AlMo}$         |
| Formula weight                                | 1233.14                                                       |
| Temperature/K                                 | 99.99                                                         |
| Crystal system                                | tetragonal                                                    |
| Space group                                   | P4/n                                                          |
| $a/\text{\AA}$                                | 13.7152(3)                                                    |
| $b/\text{\AA}$                                | 13.7152(3)                                                    |
| $c/\text{\AA}$                                | 9.5418(3)                                                     |
| $\alpha/^\circ$                               | 90                                                            |
| $\beta/^\circ$                                | 90                                                            |
| $\gamma/^\circ$                               | 90                                                            |
| Volume/ $\text{\AA}^3$                        | 1794.88(10)                                                   |
| Z                                             | 2                                                             |
| $\rho_{\text{calc}}/\text{cm}^3$              | 2.282                                                         |
| $\mu/\text{mm}^{-1}$                          | 0.632                                                         |
| F(000)                                        | 1184.0                                                        |
| Crystal size/ $\text{mm}^3$                   | $0.15 \times 0.1 \times 0.1$                                  |
| Radiation                                     | MoK $\alpha$ ( $\lambda = 0.71073$ )                          |
| $2\theta$ range for data collection/ $^\circ$ | 2.97 to 66.212                                                |
| Index ranges                                  | $-19 \leq h \leq 16, -21 \leq k \leq 13, -11 \leq l \leq 13$  |
| Reflections collected                         | 22133                                                         |
| Independent reflections                       | 3368 [ $R_{\text{int}} = 0.0225, R_{\text{sigma}} = 0.0155$ ] |
| Data/restraints/parameters                    | 3368/0/163                                                    |
| Goodness-of-fit on $F^2$                      | 1.029                                                         |
| Final R indexes [ $I \geq 2\sigma(I)$ ]       | $R_1 = 0.0226, wR_2 = 0.0555$                                 |
| Final R indexes [all data]                    | $R_1 = 0.0242, wR_2 = 0.0565$                                 |
| Largest diff. peak/hole / $e \text{\AA}^{-3}$ | 0.57/-0.70                                                    |

**Table 2 Fractional Atomic Coordinates ( $\times 10^4$ ) and Equivalent Isotropic Displacement Parameters ( $\text{\AA}^2 \times 10^3$ ) for p4n\_a.  $U_{\text{eq}}$  is defined as 1/3 of the trace of the orthogonalised  $U_{ij}$  tensor.**

| Atom | x           | y           | z           | $U_{\text{eq}}$ |
|------|-------------|-------------|-------------|-----------------|
| Mo1  | 2500        | 2500        | 3710.5 (2)  | 17.68 (5)       |
| N1   | 2500        | 2500        | 1564 (3)    | 27.3 (4)        |
| Al1  | 7500        | 2500        | 0           | 12.34 (11)      |
| O1   | 2500        | 2500        | 7085 (2)    | 27.5 (4)        |
| C1   | 2500        | 2500        | 5909 (3)    | 18.8 (4)        |
| O2   | 3493.1 (9)  | 4623.3 (8)  | 3710.3 (11) | 27.0 (2)        |
| C2   | 3143.5 (10) | 3881.0 (10) | 3712.3 (13) | 19.6 (2)        |
| O3   | 2500        | 2500        | 380 (2)     | 30.1 (4)        |
| O1_1 | 6848.6 (6)  | 3320.2 (6)  | 1012.4 (10) | 16.46 (16)      |
| C1_1 | 6871.2 (9)  | 4162.8 (8)  | 1746.0 (13) | 14.95 (19)      |
| C2_1 | 5833.3 (9)  | 4336.8 (9)  | 2367.6 (14) | 20.1 (2)        |
| F1_1 | 5220.7 (6)  | 4650.9 (7)  | 1383.4 (10) | 27.54 (19)      |
| F2_1 | 5832.3 (7)  | 4996.1 (7)  | 3400.4 (10) | 28.16 (18)      |
| F3_1 | 5464.0 (7)  | 3511.6 (7)  | 2881.1 (10) | 29.9 (2)        |
| C3_1 | 7613.0 (10) | 4102.6 (10) | 2971.7 (14) | 22.4 (3)        |
| F4_1 | 8444.2 (7)  | 3702.7 (8)  | 2539.7 (11) | 31.6 (2)        |
| F5_1 | 7268.9 (8)  | 3559.0 (8)  | 4013.3 (10) | 33.7 (2)        |
| F6_1 | 7831.6 (7)  | 4984.2 (8)  | 3513.0 (10) | 30.7 (2)        |
| C4_1 | 7142.9 (10) | 5039.7 (10) | 787.7 (16)  | 20.8 (2)        |
| F7_1 | 8100.9 (7)  | 5075.6 (7)  | 569.8 (11)  | 29.0 (2)        |
| F8_1 | 6877.6 (8)  | 5893.5 (6)  | 1349.7 (10) | 30.4 (2)        |
| F9_1 | 6712.8 (7)  | 4964.4 (7)  | -456.1 (9)  | 30.5 (2)        |

**Table 3 Anisotropic Displacement Parameters ( $\text{\AA}^2 \times 10^3$ ) for p4n\_a. The Anisotropic displacement factor exponent takes the form:  $-2\pi^2[h^2a^2U_{11}+2hka*b*U_{12}+...]$ .**

| Atom | $U_{11}$   | $U_{22}$   | $U_{33}$  | $U_{23}$  | $U_{13}$ | $U_{12}$ |
|------|------------|------------|-----------|-----------|----------|----------|
| Mo1  | 17.86 (6)  | 17.86 (6)  | 17.34 (9) | 0         | 0        | 0        |
| N1   | 23.8 (6)   | 23.8 (6)   | 34.2 (12) | 0         | 0        | 0        |
| Al1  | 11.43 (14) | 11.43 (14) | 14.2 (3)  | 0         | 0        | 0        |
| O1   | 31.4 (6)   | 31.4 (6)   | 19.6 (8)  | 0         | 0        | 0        |
| C1   | 16.3 (5)   | 16.3 (5)   | 23.8 (10) | 0         | 0        | 0        |
| O2   | 29.7 (5)   | 22.8 (5)   | 28.4 (6)  | 1.3 (4)   | 2.0 (4)  | -3.4 (4) |
| C2   | 19.0 (5)   | 23.6 (6)   | 16.2 (6)  | 0.9 (4)   | 1.3 (4)  | 2.4 (5)  |
| O3   | 36.8 (6)   | 36.8 (6)   | 16.5 (8)  | 0         | 0        | 0        |
| O1_1 | 15.6 (4)   | 13.8 (3)   | 19.9 (4)  | -3.3 (3)  | 1.8 (3)  | 1.3 (3)  |
| C1_1 | 14.7 (4)   | 14.2 (4)   | 16.0 (5)  | -0.9 (4)  | -0.2 (4) | 2.1 (4)  |
| C2_1 | 18.1 (5)   | 20.2 (5)   | 22.0 (6)  | -2.8 (4)  | 1.7 (4)  | 2.4 (4)  |
| F1_1 | 17.9 (4)   | 32.3 (5)   | 32.4 (5)  | -5.3 (4)  | -5.9 (3) | 9.1 (3)  |
| F2_1 | 25.8 (4)   | 31.1 (4)   | 27.5 (4)  | -12.7 (4) | 3.5 (3)  | 6.1 (3)  |
| F3_1 | 26.5 (4)   | 26.6 (4)   | 36.8 (5)  | 0.6 (4)   | 13.5 (4) | -2.3 (3) |
| C3_1 | 22.0 (6)   | 23.5 (5)   | 21.7 (6)  | -3.3 (4)  | -5.6 (5) | 3.7 (5)  |
| F4_1 | 19.7 (4)   | 38.4 (5)   | 36.9 (5)  | -9.1 (4)  | -9.1 (4) | 11.1 (3) |
| F5_1 | 41.9 (6)   | 37.0 (5)   | 22.2 (4)  | 8.2 (4)   | -5.5 (4) | 5.8 (4)  |
| F6_1 | 28.4 (4)   | 32.3 (5)   | 31.3 (5)  | -13.3 (4) | -8.2 (4) | 0.2 (3)  |
| C4_1 | 24.4 (5)   | 15.1 (5)   | 22.8 (6)  | 0.1 (4)   | 1.7 (5)  | -0.8 (4) |
| F7_1 | 24.9 (4)   | 24.6 (4)   | 37.4 (5)  | -3.0 (4)  | 7.9 (4)  | -8.0 (3) |
| F8_1 | 39.5 (5)   | 12.7 (3)   | 39.1 (6)  | -2.0 (3)  | 4.4 (4)  | 3.3 (3)  |
| F9_1 | 40.6 (5)   | 30.3 (4)   | 20.6 (4)  | 7.0 (4)   | -4.6 (4) | -0.4 (4) |

**Table 4 Bond Lengths for p4n\_a.**

| Atom | Atom            | Length/Å    | Atom | Atom | Length/Å    |
|------|-----------------|-------------|------|------|-------------|
| Mo1  | N1              | 2.049 (3)   | C1_1 | C3_1 | 1.5524 (18) |
| Mo1  | C1              | 2.098 (2)   | C1_1 | C4_1 | 1.5561 (18) |
| Mo1  | C2              | 2.0897 (14) | C2_1 | F1_1 | 1.3316 (16) |
| Mo1  | C2 <sup>1</sup> | 2.0896 (14) | C2_1 | F2_1 | 1.3375 (15) |
| Mo1  | C2 <sup>2</sup> | 2.0896 (14) | C2_1 | F3_1 | 1.3332 (16) |
| Mo1  | C2 <sup>3</sup> | 2.0896 (14) | C3_1 | F4_1 | 1.3305 (16) |
| N1   | O3              | 1.129 (3)   | C3_1 | F5_1 | 1.3290 (17) |
| O1   | C1              | 1.122 (3)   | C3_1 | F6_1 | 1.3486 (16) |
| O2   | C2              | 1.1252 (18) | C4_1 | F7_1 | 1.3311 (17) |
| O1_1 | All             | 1.7312 (9)  | C4_1 | F8_1 | 1.3383 (16) |
| O1_1 | C1_1            | 1.3514 (14) | C4_1 | F9_1 | 1.3293 (17) |
| C1_1 | C2_1            | 1.5605 (17) |      |      |             |

<sup>1</sup>1/2-X,1/2-Y,+Z; <sup>2</sup>1/2-Y,+X,+Z; <sup>3</sup>+Y,1/2-X,+Z

**Table 5 Bond Angles for p4n\_a.**

| Atom              | Atom | Atom              | Angle/°     | Atom | Atom | Atom | Angle/°     |
|-------------------|------|-------------------|-------------|------|------|------|-------------|
| N1                | Mo1  | C1                | 180.0       | O1_1 | C1_1 | C2_1 | 107.86 (10) |
| N1                | Mo1  | C2 <sup>1</sup>   | 90.04 (4)   | O1_1 | C1_1 | C3_1 | 111.09 (10) |
| N1                | Mo1  | C2 <sup>2</sup>   | 90.04 (4)   | O1_1 | C1_1 | C4_1 | 111.23 (10) |
| N1                | Mo1  | C2 <sup>3</sup>   | 90.04 (4)   | C3_1 | C1_1 | C2_1 | 108.64 (10) |
| N1                | Mo1  | C2                | 90.05 (4)   | C3_1 | C1_1 | C4_1 | 109.08 (10) |
| C2 <sup>3</sup>   | Mo1  | C1                | 89.96 (4)   | C4_1 | C1_1 | C2_1 | 108.88 (10) |
| C2                | Mo1  | C1                | 89.95 (4)   | F1_1 | C2_1 | C1_1 | 110.91 (11) |
| C2 <sup>1</sup>   | Mo1  | C1                | 89.96 (4)   | F1_1 | C2_1 | F2_1 | 107.48 (10) |
| C2 <sup>2</sup>   | Mo1  | C1                | 89.96 (4)   | F1_1 | C2_1 | F3_1 | 107.10 (11) |
| C2 <sup>2</sup>   | Mo1  | C2 <sup>3</sup>   | 90.0        | F2_1 | C2_1 | C1_1 | 112.61 (11) |
| C2 <sup>1</sup>   | Mo1  | C2                | 90.0        | F3_1 | C2_1 | C1_1 | 110.87 (10) |
| C2 <sup>3</sup>   | Mo1  | C2                | 90.0        | F3_1 | C2_1 | F2_1 | 107.63 (11) |
| C2 <sup>2</sup>   | Mo1  | C2 <sup>1</sup>   | 90.0        | F4_1 | C3_1 | C1_1 | 110.49 (11) |
| C2 <sup>3</sup>   | Mo1  | C2 <sup>1</sup>   | 179.91 (7)  | F4_1 | C3_1 | F6_1 | 107.32 (12) |
| C2 <sup>2</sup>   | Mo1  | C2                | 179.91 (7)  | F5_1 | C3_1 | C1_1 | 111.13 (11) |
| O3                | N1   | Mo1               | 180.0       | F5_1 | C3_1 | F4_1 | 107.75 (11) |
| O1_1 <sup>4</sup> | All  | O1_1 <sup>5</sup> | 112.16 (6)  | F5_1 | C3_1 | F6_1 | 107.19 (11) |
| O1_1 <sup>5</sup> | All  | O1_1              | 108.14 (3)  | F6_1 | C3_1 | C1_1 | 112.74 (10) |
| O1_1 <sup>4</sup> | All  | O1_1              | 108.15 (3)  | F7_1 | C4_1 | C1_1 | 110.90 (11) |
| O1_1 <sup>4</sup> | All  | O1_1 <sup>6</sup> | 108.14 (3)  | F7_1 | C4_1 | F8_1 | 107.37 (12) |
| O1_1 <sup>5</sup> | All  | O1_1 <sup>6</sup> | 108.14 (3)  | F8_1 | C4_1 | C1_1 | 112.07 (12) |
| O1_1 <sup>6</sup> | All  | O1_1              | 112.16 (6)  | F9_1 | C4_1 | C1_1 | 111.00 (11) |
| O1                | C1   | Mo1               | 180.0       | F9_1 | C4_1 | F7_1 | 107.55 (13) |
| O2                | C2   | Mo1               | 179.73 (14) | F9_1 | C4_1 | F8_1 | 107.76 (11) |
| C1_1              | O1_1 | All               | 146.39 (8)  |      |      |      |             |

<sup>1</sup>1/2-Y,+X,+Z; <sup>2</sup>1/2-X,1/2-Y,+Z; <sup>3</sup>+Y,1/2-X,+Z; <sup>4</sup>1-Y,-1/2+X,-Z; <sup>5</sup>1/2+Y,1-X,-Z; <sup>6</sup>3/2-X,1/2-Y,+Z

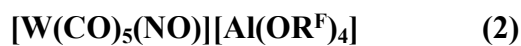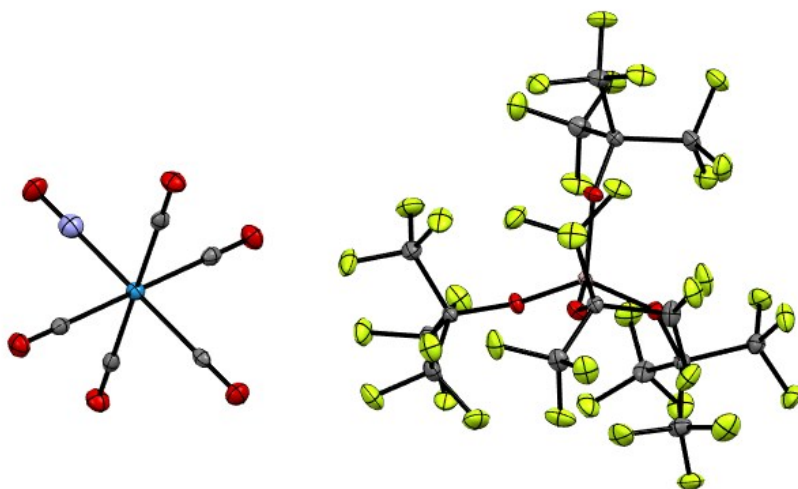

**Table 1** Crystal data and structure refinement for p4n\_a.

|                                                |                                                                  |
|------------------------------------------------|------------------------------------------------------------------|
| CCDC Deposition Number                         | 1952378                                                          |
| Identification code                            | p4n_a                                                            |
| Empirical formula                              | $\text{C}_{21}\text{NO}_{10}\text{F}_{36}\text{AlW}$             |
| Formula weight                                 | 1321.00                                                          |
| Temperature/K                                  | 99.99                                                            |
| Crystal system                                 | tetragonal                                                       |
| Space group                                    | P4/n                                                             |
| a/Å                                            | 13.6990(7)                                                       |
| b/Å                                            | 13.6990(7)                                                       |
| c/Å                                            | 9.5293(5)                                                        |
| $\alpha/^\circ$                                | 90                                                               |
| $\beta/^\circ$                                 | 90                                                               |
| $\gamma/^\circ$                                | 90                                                               |
| Volume/Å <sup>3</sup>                          | 1788.29(16)                                                      |
| Z                                              | 2                                                                |
| $\rho_{\text{calc}}/\text{cm}^3$               | 2.4531                                                           |
| $\mu/\text{mm}^{-1}$                           | 3.497                                                            |
| F(000)                                         | 1248.3                                                           |
| Crystal size/mm <sup>3</sup>                   | 0.2 × 0.2 × 0.15                                                 |
| Radiation                                      | Mo K $\alpha$ ( $\lambda = 0.71073$ )                            |
| 2 $\theta$ range for data collection/ $^\circ$ | 4.2 to 54.16                                                     |
| Index ranges                                   | -13 ≤ h ≤ 17, -17 ≤ k ≤ 16, -9 ≤ l ≤ 11                          |
| Reflections collected                          | 12595                                                            |
| Independent reflections                        | 1924 [ $R_{\text{int}} = 0.0462$ , $R_{\text{sigma}} = 0.0297$ ] |
| Data/restraints/parameters                     | 1924/0/163                                                       |
| Goodness-of-fit on F <sup>2</sup>              | 1.129                                                            |
| Final R indexes [ $I \geq 2\sigma(I)$ ]        | $R_1 = 0.0236$ , $wR_2 = 0.0736$                                 |
| Final R indexes [all data]                     | $R_1 = 0.0236$ , $wR_2 = 0.0737$                                 |
| Largest diff. peak/hole / e Å <sup>-3</sup>    | 1.25/-0.64                                                       |

**Table 2 Fractional Atomic Coordinates ( $\times 10^4$ ) and Equivalent Isotropic Displacement Parameters ( $\text{\AA}^2 \times 10^3$ ) for p4n\_a.  $U_{eq}$  is defined as 1/3 of the trace of the orthogonalised  $U_{ij}$  tensor.**

| Atom | x           | y           | z          | U(eq)      |
|------|-------------|-------------|------------|------------|
| W1   | 2500        | 2500        | 3707.0 (2) | 14.39 (11) |
| N1   | 2500        | 2500        | 1574 (7)   | 25.2 (14)  |
| All  | 7500        | 2500        | 10000      | 9.3 (3)    |
| O1   | 1511 (3)    | 380 (3)     | 3707 (3)   | 23.0 (7)   |
| C1   | 1859 (3)    | 1127 (4)    | 3712 (3)   | 16.1 (9)   |
| O2   | 2500        | 2500        | 7076 (5)   | 23.3 (11)  |
| C2   | 2500        | 2500        | 5897 (8)   | 14.0 (12)  |
| O3   | 2500        | 2500        | 377 (5)    | 27.4 (12)  |
| O1_1 | 6680 (2)    | 1847 (2)    | 8987 (3)   | 13.9 (5)   |
| C1_1 | 5837 (2)    | 1869 (3)    | 8246 (4)   | 11.7 (6)   |
| C2_1 | 4961 (3)    | 2141 (3)    | 9213 (5)   | 18.4 (8)   |
| F1_1 | 5032.4 (18) | 1712.7 (19) | 10455 (2)  | 26.3 (5)   |
| F2_1 | 4104 (2)    | 1878 (2)    | 8647 (3)   | 27.5 (7)   |
| F3_1 | 4921.6 (19) | 3100.1 (19) | 9430 (3)   | 25.2 (6)   |
| C3_1 | 5897 (3)    | 2613 (3)    | 7022 (4)   | 20.0 (8)   |
| F4_1 | 6440 (2)    | 2268 (2)    | 5978 (3)   | 29.8 (6)   |
| F5_1 | 6297 (2)    | 3443.0 (18) | 7456 (3)   | 28.2 (6)   |
| F6_1 | 5015 (2)    | 2832 (2)    | 6481 (3)   | 26.4 (6)   |
| C4_1 | 5659 (3)    | 826 (3)     | 7632 (4)   | 17.4 (7)   |
| F7_1 | 6484.1 (18) | 462.1 (17)  | 7115 (3)   | 25.8 (5)   |
| F8_1 | 4997 (2)    | 828.8 (19)  | 6596 (3)   | 25.2 (5)   |
| F9_1 | 5345 (2)    | 217 (2)     | 8611 (2)   | 24.5 (6)   |

**Table 3 Anisotropic Displacement Parameters ( $\text{\AA}^2 \times 10^3$ ) for p4n\_a. The Anisotropic displacement factor exponent takes the form:  $-2\pi^2[h^2a^2U_{11}+2hka*b*U_{12}+...]$ .**

| Atom | $U_{11}$   | $U_{22}$   | $U_{33}$   | $U_{12}$  | $U_{13}$   | $U_{23}$   |
|------|------------|------------|------------|-----------|------------|------------|
| W1   | 13.74 (12) | 13.74 (12) | 15.67 (16) | -0        | -0         | 0          |
| N1   | 24 (2)     | 24 (2)     | 28 (3)     | -0        | -0         | 0          |
| All  | 7.7 (5)    | 7.7 (5)    | 12.3 (8)   | -0        | -0         | 0          |
| O1   | 22.8 (17)  | 17.1 (17)  | 29.1 (18)  | -4.1 (14) | -1.7 (11)  | -0.7 (10)  |
| C1   | 15.5 (19)  | 20 (2)     | 12 (2)     | 3.1 (18)  | -1.1 (12)  | -0.0 (12)  |
| O2   | 25.5 (16)  | 25.5 (16)  | 19 (3)     | -0        | -0         | 0          |
| C2   | 10.7 (17)  | 10.7 (17)  | 21 (3)     | -0        | -0         | 0          |
| O3   | 33.0 (18)  | 33.0 (18)  | 16 (3)     | -0        | -0         | 0          |
| O1_1 | 11.4 (12)  | 12.2 (12)  | 18.2 (11)  | -1.2 (10) | -3.5 (10)  | -1.9 (10)  |
| C1_1 | 10.2 (15)  | 11.7 (15)  | 13.2 (16)  | -0.6 (13) | -0.2 (14)  | 0.4 (14)   |
| C2_1 | 11.0 (17)  | 22.6 (18)  | 22 (2)     | 0.3 (14)  | -0.2 (16)  | -1.3 (16)  |
| F1_1 | 25.8 (12)  | 33.4 (14)  | 19.7 (12)  | 0.2 (11)  | 7.4 (10)   | 3.8 (10)   |
| F2_1 | 13.3 (13)  | 33.8 (17)  | 35.5 (17)  | -4.1 (11) | -1.5 (9)   | -4.3 (10)  |
| F3_1 | 20.8 (12)  | 21.8 (12)  | 33.1 (15)  | 7.2 (10)  | -2.1 (11)  | -5.7 (10)  |
| C3_1 | 19.5 (16)  | 20 (2)     | 19.9 (16)  | -3.5 (16) | -3.3 (13)  | 5.9 (16)   |
| F4_1 | 31.1 (14)  | 38.4 (18)  | 20.0 (10)  | -5.8 (11) | 8.2 (10)   | 4.5 (11)   |
| F5_1 | 34.6 (14)  | 15.8 (11)  | 34.2 (13)  | -9.6 (10) | -9.1 (11)  | 7.9 (10)   |
| F6_1 | 29.0 (15)  | 23.0 (13)  | 27.3 (12)  | 0.8 (11)  | -12.8 (10) | 8.2 (9)    |
| C4_1 | 17.3 (17)  | 16.0 (17)  | 18.7 (17)  | -3.1 (14) | -4.2 (14)  | -0.6 (14)  |
| F7_1 | 21.4 (12)  | 21.7 (12)  | 34.3 (14)  | 1.0 (9)   | 0.1 (10)   | -13.3 (10) |
| F8_1 | 27.7 (14)  | 24.5 (13)  | 23.4 (10)  | -6.8 (11) | -11.9 (11) | -2.7 (11)  |
| F9_1 | 29.5 (15)  | 15.0 (13)  | 28.9 (14)  | -8.4 (11) | -5.9 (9)   | 6.0 (9)    |

**Table 4 Bond Lengths for p4n\_a.**

| Atom | Atom              | Length/Å  | Atom | Atom | Length/Å  |
|------|-------------------|-----------|------|------|-----------|
| W1   | N1                | 2.033 (7) | O1_1 | C1_1 | 1.354 (4) |
| W1   | C1 <sup>1</sup>   | 2.075 (5) | C1_1 | C2_1 | 1.557 (5) |
| W1   | C1                | 2.075 (5) | C1_1 | C3_1 | 1.551 (5) |
| W1   | C1 <sup>2</sup>   | 2.075 (5) | C1_1 | C4_1 | 1.562 (5) |
| W1   | C1 <sup>3</sup>   | 2.075 (5) | C2_1 | F1_1 | 1.325 (5) |
| W1   | C2                | 2.087 (7) | C2_1 | F2_1 | 1.342 (5) |
| N1   | O3                | 1.140 (8) | C2_1 | F3_1 | 1.332 (5) |
| Al1  | O1_1 <sup>4</sup> | 1.731 (3) | C3_1 | F4_1 | 1.330 (5) |
| Al1  | O1_1              | 1.731 (3) | C3_1 | F5_1 | 1.328 (5) |
| Al1  | O1_1 <sup>5</sup> | 1.731 (3) | C3_1 | F6_1 | 1.347 (5) |
| Al1  | O1_1 <sup>6</sup> | 1.731 (3) | C4_1 | F7_1 | 1.330 (5) |
| O1   | C1                | 1.129 (6) | C4_1 | F8_1 | 1.340 (4) |
| O2   | C2                | 1.124 (9) | C4_1 | F9_1 | 1.324 (5) |

<sup>1</sup>1/2-Y,+X,+Z; <sup>2</sup>1/2-X,1/2-Y,+Z; <sup>3</sup>+Y,1/2-X,+Z; <sup>4</sup>1-Y,-1/2+X,2-Z; <sup>5</sup>3/2-X,1/2-Y,+Z; <sup>6</sup>1/2+Y,1-X,2-Z

**Table 5 Bond Angles for p4n\_a.**

| Atom              | Atom | Atom              | Angle/°     | Atom | Atom | Atom | Angle/°   |
|-------------------|------|-------------------|-------------|------|------|------|-----------|
| C1                | W1   | N1                | 90.14 (9)   | C2_1 | C1_1 | O1_1 | 110.7 (3) |
| C1 <sup>1</sup>   | W1   | N1                | 90.14 (9)   | C3_1 | C1_1 | O1_1 | 111.1 (3) |
| C1 <sup>2</sup>   | W1   | N1                | 90.14 (9)   | C3_1 | C1_1 | C2_1 | 109.2 (3) |
| C1 <sup>3</sup>   | W1   | N1                | 90.14 (9)   | C4_1 | C1_1 | O1_1 | 108.0 (3) |
| C1 <sup>3</sup>   | W1   | C1 <sup>1</sup>   | 90.0        | C4_1 | C1_1 | C2_1 | 108.7 (3) |
| C1 <sup>2</sup>   | W1   | C1 <sup>1</sup>   | 179.73 (18) | C4_1 | C1_1 | C3_1 | 109.1 (3) |
| C1 <sup>3</sup>   | W1   | C1                | 179.73 (18) | F1_1 | C2_1 | C1_1 | 111.5 (3) |
| C1 <sup>3</sup>   | W1   | C1 <sup>2</sup>   | 90.0        | F2_1 | C2_1 | C1_1 | 111.9 (3) |
| C1 <sup>2</sup>   | W1   | C1                | 90.0        | F2_1 | C2_1 | F1_1 | 107.7 (3) |
| C1 <sup>1</sup>   | W1   | C1                | 90.0        | F3_1 | C2_1 | C1_1 | 111.1 (3) |
| C2                | W1   | N1                | 180.0       | F3_1 | C2_1 | F1_1 | 107.5 (4) |
| C2                | W1   | C1 <sup>1</sup>   | 89.86 (9)   | F3_1 | C2_1 | F2_1 | 107.0 (4) |
| C2                | W1   | C1                | 89.86 (9)   | F4_1 | C3_1 | C1_1 | 111.1 (3) |
| C2                | W1   | C1 <sup>3</sup>   | 89.86 (9)   | F5_1 | C3_1 | C1_1 | 110.5 (3) |
| C2                | W1   | C1 <sup>2</sup>   | 89.86 (9)   | F5_1 | C3_1 | F4_1 | 107.8 (3) |
| O3                | N1   | W1                | 180.0       | F6_1 | C3_1 | C1_1 | 112.7 (3) |
| O1_1 <sup>4</sup> | Al1  | O1_1 <sup>5</sup> | 108.14 (9)  | F6_1 | C3_1 | F4_1 | 107.1 (3) |
| O1_1              | Al1  | O1_1 <sup>5</sup> | 108.14 (9)  | F6_1 | C3_1 | F5_1 | 107.4 (3) |
| O1_1 <sup>6</sup> | Al1  | O1_1              | 108.14 (9)  | F7_1 | C4_1 | C1_1 | 110.5 (3) |
| O1_1 <sup>6</sup> | Al1  | O1_1 <sup>5</sup> | 112.16 (19) | F8_1 | C4_1 | C1_1 | 112.3 (3) |
| O1_1 <sup>4</sup> | Al1  | O1_1              | 112.16 (19) | F8_1 | C4_1 | F7_1 | 107.7 (3) |
| O1_1 <sup>6</sup> | Al1  | O1_1 <sup>4</sup> | 108.14 (9)  | F9_1 | C4_1 | C1_1 | 111.2 (3) |
| O1                | C1   | W1                | 179.6 (3)   | F9_1 | C4_1 | F7_1 | 107.5 (3) |
| O2                | C2   | W1                | 180.0       | F9_1 | C4_1 | F8_1 | 107.5 (3) |
| C1_1              | O1_1 | Al1 <sup>6</sup>  | 146.5 (3)   |      |      |      |           |

<sup>1</sup>1/2-Y,+X,+Z; <sup>2</sup>+Y,1/2-X,+Z; <sup>3</sup>1/2-X,1/2-Y,+Z; <sup>4</sup>3/2-X,1/2-Y,+Z; <sup>5</sup>1-Y,-1/2+X,2-Z; <sup>6</sup>1/2+Y,1-X,2-Z

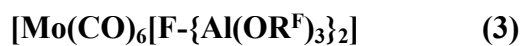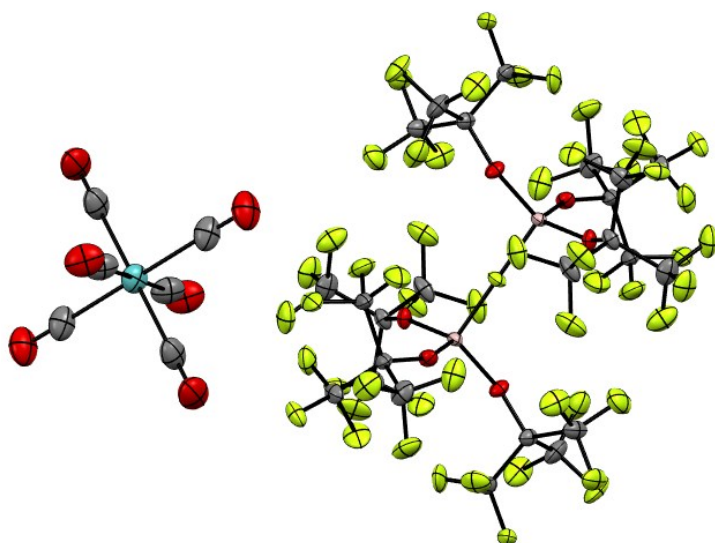

**Table 1 Crystal data and structure refinement for pa-3\_a.**

|                                               |                                                               |
|-----------------------------------------------|---------------------------------------------------------------|
| CCDC Deposition Number                        | 1952385                                                       |
| Identification code                           | pa-3_a                                                        |
| Empirical formula                             | $\text{C}_{30}\text{O}_{12}\text{F}_{55}\text{Al}_2\text{Mo}$ |
| Formula weight                                | 1747.20                                                       |
| Temperature/K                                 | 99.99                                                         |
| Crystal system                                | cubic                                                         |
| Space group                                   | Pa-3                                                          |
| $a/\text{\AA}$                                | 17.285(3)                                                     |
| $b/\text{\AA}$                                | 17.285(3)                                                     |
| $c/\text{\AA}$                                | 17.285(3)                                                     |
| $\alpha/^\circ$                               | 90                                                            |
| $\beta/^\circ$                                | 90                                                            |
| $\gamma/^\circ$                               | 90                                                            |
| Volume/ $\text{\AA}^3$                        | 5164(2)                                                       |
| $Z$                                           | 4                                                             |
| $\rho_{\text{calc}}/\text{cm}^3$              | 2.247                                                         |
| $\mu/\text{mm}^{-1}$                          | 0.544                                                         |
| $F(000)$                                      | 3356.0                                                        |
| Crystal size/ $\text{mm}^3$                   | $0.15 \times 0.1 \times 0.1$                                  |
| Radiation                                     | MoK $\alpha$ ( $\lambda = 0.71073$ )                          |
| $2\theta$ range for data collection/ $^\circ$ | 4.082 to 50.154                                               |
| Index ranges                                  | $-20 \leq h \leq 20, -20 \leq k \leq 20, -20 \leq l \leq 20$  |
| Reflections collected                         | 35822                                                         |
| Independent reflections                       | 1541 [ $R_{\text{int}} = 0.0829, R_{\text{sigma}} = 0.0244$ ] |
| Data/restraints/parameters                    | 1541/1135/279                                                 |
| Goodness-of-fit on $F^2$                      | 1.191                                                         |
| Final R indexes [ $I \geq 2\sigma(I)$ ]       | $R_1 = 0.0537, wR_2 = 0.1469$                                 |
| Final R indexes [all data]                    | $R_1 = 0.0671, wR_2 = 0.1549$                                 |
| Largest diff. peak/hole / $e \text{\AA}^{-3}$ | 0.81/-0.86                                                    |

**Table 2 Fractional Atomic Coordinates ( $\times 10^4$ ) and Equivalent Isotropic Displacement Parameters ( $\text{\AA}^2 \times 10^3$ ) for pa-3\_a.  $U_{eq}$  is defined as 1/3 of the trace of the orthogonalised  $U_{ij}$  tensor.**

| Atom | x          | y         | z          | $U_{eq}$  |
|------|------------|-----------|------------|-----------|
| Mo1  | 5000       | 5000      | 5000       | 40.3 (4)  |
| F1   | 5000       | 0         | 5000       | 20.0 (13) |
| All  | 5587.6 (7) | 587.6 (7) | 4412.4 (7) | 14.4 (5)  |
| O1   | 4138 (3)   | 3430 (3)  | 5524 (3)   | 63.6 (14) |
| C1   | 4438 (4)   | 3978 (4)  | 5351 (4)   | 48.9 (15) |
| O1_2 | 5871 (13)  | 1340 (15) | 4981 (15)  | 19 (4)    |
| C1_2 | 6440 (7)   | 1701 (7)  | 5391 (7)   | 20 (2)    |
| C2_2 | 6108 (6)   | 2471 (5)  | 5693 (5)   | 31 (2)    |
| F1_2 | 6056 (6)   | 2998 (4)  | 5132 (5)   | 41 (2)    |
| F2_2 | 6534 (8)   | 2772 (6)  | 6256 (7)   | 41 (3)    |
| F3_2 | 5390 (8)   | 2362 (15) | 5960 (15)  | 44 (4)    |
| C3_2 | 6688 (5)   | 1193 (6)  | 6085 (5)   | 29 (2)    |
| F4_2 | 6774 (15)  | 458 (8)   | 5865 (15)  | 42 (5)    |
| F5_2 | 6184 (9)   | 1204 (8)  | 6661 (8)   | 45 (3)    |
| F6_2 | 7369 (5)   | 1416 (8)  | 6369 (7)   | 39 (3)    |
| C4_2 | 7144 (5)   | 1863 (5)  | 4865 (5)   | 25 (2)    |
| F7_2 | 7561 (4)   | 1222 (5)  | 4769 (5)   | 38.8 (19) |
| F8_2 | 7623 (11)  | 2406 (13) | 5112 (17)  | 29 (3)    |
| F9_2 | 6875 (16)  | 2061 (15) | 4167 (7)   | 43 (5)    |
| O1_1 | 5900 (12)  | 1272 (14) | 5036 (14)  | 25 (4)    |
| C1_1 | 6500 (7)   | 1624 (6)  | 5402 (6)   | 21 (2)    |
| C2_1 | 7130 (5)   | 1020 (5)  | 5622 (5)   | 25.9 (19) |
| F1_1 | 6799 (13)  | 368 (7)   | 5864 (13)  | 40 (4)    |
| F2_1 | 7606 (5)   | 1263 (7)  | 6175 (6)   | 37 (2)    |
| F3_1 | 7570 (4)   | 841 (4)   | 5015 (4)   | 33.1 (16) |
| C3_1 | 6876 (5)   | 2255 (5)  | 4889 (5)   | 29 (2)    |
| F4_1 | 6413 (4)   | 2881 (4)  | 4853 (5)   | 38.2 (18) |
| F5_1 | 6995 (13)  | 2013 (12) | 4174 (7)   | 38 (3)    |
| F6_1 | 7543 (10)  | 2468 (12) | 5203 (16)  | 42 (5)    |
| C4_1 | 6190 (5)   | 1999 (5)  | 6153 (5)   | 30 (2)    |
| F7_1 | 5526 (7)   | 2370 (12) | 6017 (13)  | 41 (3)    |
| F8_1 | 6683 (7)   | 2520 (6)  | 6437 (6)   | 45 (3)    |
| F9_1 | 6058 (8)   | 1471 (7)  | 6690 (7)   | 42 (3)    |

**Table 3 Anisotropic Displacement Parameters ( $\text{\AA}^2 \times 10^3$ ) for pa-3\_a. The Anisotropic displacement factor exponent takes the form:  $-2\pi^2[h^2a^2U_{11}+2hka*b*U_{12}+...]$ .**

| Atom | $U_{11}$  | $U_{22}$  | $U_{33}$  | $U_{23}$  | $U_{13}$  | $U_{12}$  |
|------|-----------|-----------|-----------|-----------|-----------|-----------|
| Mo1  | 40.3 (4)  | 40.3 (4)  | 40.3 (4)  | -10.0 (3) | -10.0 (3) | -10.0 (3) |
| F1   | 20.0 (13) | 20.0 (13) | 20.0 (13) | 4.8 (13)  | 4.8 (13)  | -4.8 (13) |
| All  | 14.4 (5)  | 14.4 (5)  | 14.4 (5)  | 2.1 (5)   | 2.1 (5)   | -2.1 (5)  |
| O1   | 53 (3)    | 46 (3)    | 92 (4)    | -2 (3)    | -14 (3)   | -15 (2)   |
| C1   | 39 (3)    | 42 (3)    | 66 (4)    | -10 (3)   | -15 (3)   | -3 (3)    |
| O1_2 | 23 (7)    | 13 (5)    | 23 (6)    | -2 (4)    | -5 (5)    | -1 (5)    |
| C1_2 | 20 (5)    | 20 (5)    | 21 (5)    | 6 (4)     | -6 (4)    | -3 (4)    |
| C2_2 | 35 (5)    | 30 (5)    | 29 (5)    | -8 (3)    | -13 (4)   | 0 (4)     |
| F1_2 | 55 (6)    | 23 (4)    | 47 (5)    | 5 (3)     | -15 (4)   | 9 (4)     |
| F2_2 | 52 (6)    | 32 (5)    | 39 (6)    | -17 (4)   | -17 (4)   | -3 (4)    |
| F3_2 | 34 (5)    | 58 (8)    | 39 (7)    | -17 (5)   | -5 (5)    | 8 (5)     |
| C3_2 | 24 (5)    | 29 (4)    | 33 (5)    | 15 (4)    | -11 (3)   | -6 (4)    |
| F4_2 | 47 (10)   | 27 (5)    | 51 (10)   | 13 (5)    | -20 (7)   | 2 (5)     |
| F5_2 | 45 (6)    | 57 (8)    | 34 (5)    | 18 (5)    | 1 (4)     | -10 (6)   |



|      |         |         |         |         |         |         |
|------|---------|---------|---------|---------|---------|---------|
| F6_2 | 34 (5)  | 50 (7)  | 32 (6)  | 20 (4)  | -18 (4) | -13 (5) |
| C4_2 | 25 (5)  | 29 (5)  | 20 (5)  | 2 (4)   | -7 (3)  | -9 (3)  |
| F7_2 | 19 (3)  | 43 (4)  | 55 (5)  | -4 (4)  | 7 (3)   | 1 (3)   |
| F8_2 | 25 (5)  | 39 (6)  | 22 (5)  | -5 (4)  | 4 (4)   | -14 (4) |
| F9_2 | 47 (11) | 69 (10) | 12 (5)  | 8 (5)   | -5 (4)  | -8 (6)  |
| O1_1 | 16 (6)  | 24 (7)  | 36 (8)  | -10 (6) | -5 (5)  | -2 (5)  |
| C1_1 | 21 (5)  | 18 (5)  | 25 (5)  | -4 (4)  | -1 (4)  | -5 (3)  |
| C2_1 | 22 (4)  | 26 (4)  | 29 (4)  | 5 (3)   | -5 (3)  | -8 (3)  |
| F1_1 | 43 (9)  | 24 (5)  | 54 (9)  | 10 (5)  | -2 (7)  | -12 (5) |
| F2_1 | 42 (5)  | 36 (5)  | 34 (5)  | 7 (3)   | -14 (4) | -6 (4)  |
| F3_1 | 23 (3)  | 39 (4)  | 38 (3)  | -4 (3)  | -3 (2)  | 11 (3)  |
| C3_1 | 22 (4)  | 28 (5)  | 36 (5)  | 7 (4)   | -4 (4)  | -4 (3)  |
| F4_1 | 38 (4)  | 17 (3)  | 60 (5)  | 8 (3)   | -14 (3) | -8 (3)  |
| F5_1 | 28 (6)  | 54 (8)  | 31 (6)  | 7 (5)   | 3 (4)   | -18 (5) |
| F6_1 | 33 (6)  | 45 (7)  | 48 (11) | 11 (6)  | -6 (6)  | -24 (5) |
| C4_1 | 28 (4)  | 27 (4)  | 36 (4)  | -7 (3)  | 0 (4)   | -5 (3)  |
| F7_1 | 34 (5)  | 42 (6)  | 46 (7)  | -21 (5) | 4 (5)   | 7 (4)   |
| F8_1 | 48 (5)  | 50 (6)  | 36 (5)  | -20 (4) | -5 (4)  | -15 (5) |
| F9_1 | 43 (6)  | 57 (7)  | 26 (4)  | 2 (4)   | 14 (4)  | -12 (5) |

**Table 4 Bond Lengths for pa-3\_a.**

| Atom Atom           | Length/Å   | Atom Atom | Length/Å   |
|---------------------|------------|-----------|------------|
| Mo1 C1 <sup>1</sup> | 2.105 (7)  | C3_2 F6_2 | 1.333 (11) |
| Mo1 C1 <sup>2</sup> | 2.105 (7)  | C4_2 F7_2 | 1.333 (11) |
| Mo1 C1 <sup>3</sup> | 2.105 (7)  | C4_2 F8_2 | 1.323 (12) |
| Mo1 C1              | 2.105 (7)  | C4_2 F9_2 | 1.338 (13) |
| Mo1 C1 <sup>4</sup> | 2.105 (7)  | O1_1 Al1  | 1.689 (17) |
| Mo1 C1 <sup>5</sup> | 2.105 (7)  | O1_1 C1_1 | 1.358 (11) |
| F1 Al1              | 1.759 (2)  | C1_1 C2_1 | 1.555 (11) |
| F1 Al1 <sup>6</sup> | 1.759 (2)  | C1_1 C3_1 | 1.549 (11) |
| O1 C1               | 1.120 (8)  | C1_1 C4_1 | 1.548 (11) |
| O1_2 Al1            | 1.702 (19) | C2_1 F1_1 | 1.333 (12) |
| O1_2 C1_2           | 1.364 (12) | C2_1 F2_1 | 1.329 (10) |
| C1_2 C2_2           | 1.542 (12) | C2_1 F3_1 | 1.332 (9)  |
| C1_2 C3_2           | 1.546 (11) | C3_1 F4_1 | 1.346 (10) |
| C1_2 C4_2           | 1.543 (12) | C3_1 F5_1 | 1.322 (13) |
| C2_2 F1_2           | 1.333 (10) | C3_1 F6_1 | 1.327 (12) |
| C2_2 F2_2           | 1.327 (11) | C4_1 F7_1 | 1.335 (12) |
| C2_2 F3_2           | 1.336 (13) | C4_1 F8_1 | 1.334 (10) |
| C3_2 F4_2           | 1.335 (13) | C4_1 F9_1 | 1.321 (11) |
| C3_2 F5_2           | 1.324 (12) |           |            |

<sup>1</sup>+Y,+Z,+X; <sup>2</sup>+Z,+X,+Y; <sup>3</sup>1-X,1-Y,1-Z; <sup>4</sup>1-Z,1-X,1-Y; <sup>5</sup>1-Y,1-Z,1-X; <sup>6</sup>1-X,-Y,1-Z

**Table 5 Bond Angles for pa-3\_a.**

| Atom Atom Atom                      | Angle/°  | Atom Atom Atom | Angle/°    |
|-------------------------------------|----------|----------------|------------|
| C1 Mo1 C1 <sup>1</sup>              | 90.7 (3) | F1_2 C2_2 F3_2 | 106.6 (12) |
| C1 <sup>2</sup> Mo1 C1 <sup>3</sup> | 89.3 (3) | F2_2 C2_2 C1_2 | 112.3 (9)  |
| C1 <sup>2</sup> Mo1 C1 <sup>4</sup> | 90.7 (3) | F2_2 C2_2 F1_2 | 107.6 (9)  |
| C1 Mo1 C1 <sup>2</sup>              | 180.0    | F2_2 C2_2 F3_2 | 108.5 (14) |
| C1 Mo1 C1 <sup>4</sup>              | 89.3 (3) | F3_2 C2_2 C1_2 | 109.9 (14) |
| C1 <sup>1</sup> Mo1 C1 <sup>2</sup> | 89.3 (3) | F4_2 C3_2 C1_2 | 110.5 (13) |
| C1 <sup>1</sup> Mo1 C1 <sup>3</sup> | 89.3 (3) | F5_2 C3_2 C1_2 | 113.2 (9)  |

|                   |      |                   |             |      |      |      |            |
|-------------------|------|-------------------|-------------|------|------|------|------------|
| C1                | Mo1  | C1 <sup>5</sup>   | 89.3 (3)    | F5_2 | C3_2 | F4_2 | 107.4 (13) |
| C1 <sup>5</sup>   | Mo1  | C1 <sup>3</sup>   | 180.00 (19) | F5_2 | C3_2 | F6_2 | 107.5 (11) |
| C1 <sup>1</sup>   | Mo1  | C1 <sup>5</sup>   | 90.7 (3)    | F6_2 | C3_2 | C1_2 | 111.5 (9)  |
| C1 <sup>1</sup>   | Mo1  | C1 <sup>4</sup>   | 180.0       | F6_2 | C3_2 | F4_2 | 106.3 (13) |
| C1 <sup>2</sup>   | Mo1  | C1 <sup>5</sup>   | 90.7 (3)    | F7_2 | C4_2 | C1_2 | 110.4 (8)  |
| C1 <sup>3</sup>   | Mo1  | C1 <sup>4</sup>   | 90.7 (3)    | F7_2 | C4_2 | F9_2 | 106.7 (12) |
| C1                | Mo1  | C1 <sup>3</sup>   | 90.7 (3)    | F8_2 | C4_2 | C1_2 | 115.6 (14) |
| C1 <sup>5</sup>   | Mo1  | C1 <sup>4</sup>   | 89.3 (3)    | F8_2 | C4_2 | F7_2 | 107.0 (13) |
| All <sup>6</sup>  | F1   | All               | 180.0       | F8_2 | C4_2 | F9_2 | 109.0 (15) |
| O1_2 <sup>7</sup> | All  | F1                | 105.9 (10)  | F9_2 | C4_2 | C1_2 | 107.8 (13) |
| O1_2              | All  | F1                | 105.9 (10)  | C1_1 | O1_1 | All  | 148.7 (19) |
| O1_2 <sup>8</sup> | All  | F1                | 105.9 (10)  | O1_1 | C1_1 | C2_1 | 110.4 (13) |
| O1_2              | All  | O1_2 <sup>7</sup> | 112.8 (8)   | O1_1 | C1_1 | C3_1 | 111.7 (13) |
| O1_2 <sup>7</sup> | All  | O1_2 <sup>8</sup> | 112.8 (8)   | O1_1 | C1_1 | C4_1 | 108.2 (13) |
| O1_2              | All  | O1_2 <sup>8</sup> | 112.8 (8)   | C3_1 | C1_1 | C2_1 | 108.6 (8)  |
| O1_1 <sup>7</sup> | All  | F1                | 102.7 (9)   | C4_1 | C1_1 | C2_1 | 108.6 (8)  |
| O1_1              | All  | F1                | 102.7 (9)   | C4_1 | C1_1 | C3_1 | 109.2 (8)  |
| O1_1 <sup>8</sup> | All  | F1                | 102.7 (9)   | F1_1 | C2_1 | C1_1 | 110.1 (12) |
| O1_1              | All  | O1_2 <sup>7</sup> | 118.1 (15)  | F2_1 | C2_1 | C1_1 | 113.5 (8)  |
| O1_1 <sup>7</sup> | All  | O1_2 <sup>7</sup> | 5.4 (18)    | F2_1 | C2_1 | F1_1 | 107.8 (12) |
| O1_1              | All  | O1_2 <sup>8</sup> | 110.1 (15)  | F2_1 | C2_1 | F3_1 | 106.7 (7)  |
| O1_1 <sup>8</sup> | All  | O1_2 <sup>7</sup> | 110.1 (15)  | F3_1 | C2_1 | C1_1 | 111.2 (7)  |
| O1_1 <sup>8</sup> | All  | O1_2 <sup>8</sup> | 5.4 (18)    | F3_1 | C2_1 | F1_1 | 107.2 (10) |
| O1_1 <sup>7</sup> | All  | O1_2 <sup>8</sup> | 118.1 (15)  | F4_1 | C3_1 | C1_1 | 110.1 (8)  |
| O1_1 <sup>7</sup> | All  | O1_1 <sup>8</sup> | 115.3 (6)   | F5_1 | C3_1 | C1_1 | 112.1 (12) |
| O1_1              | All  | O1_1 <sup>8</sup> | 115.3 (6)   | F5_1 | C3_1 | F4_1 | 107.7 (11) |
| O1_1              | All  | O1_1 <sup>7</sup> | 115.3 (6)   | F5_1 | C3_1 | F6_1 | 109.5 (14) |
| O1                | C1   | Mo1               | 178.7 (6)   | F6_1 | C3_1 | C1_1 | 109.0 (13) |
| C1_2              | O1_2 | All               | 149 (2)     | F6_1 | C3_1 | F4_1 | 108.2 (12) |
| O1_2              | C1_2 | C2_2              | 107.6 (14)  | F7_1 | C4_1 | C1_1 | 110.6 (12) |
| O1_2              | C1_2 | C3_2              | 110.1 (14)  | F8_1 | C4_1 | C1_1 | 111.7 (9)  |
| O1_2              | C1_2 | C4_2              | 110.2 (14)  | F8_1 | C4_1 | F7_1 | 106.9 (11) |
| C2_2              | C1_2 | C3_2              | 109.3 (9)   | F9_1 | C4_1 | C1_1 | 111.1 (8)  |
| C2_2              | C1_2 | C4_2              | 109.6 (9)   | F9_1 | C4_1 | F7_1 | 107.9 (11) |
| C4_2              | C1_2 | C3_2              | 110.0 (8)   | F9_1 | C4_1 | F8_1 | 108.6 (10) |
| F1_2              | C2_2 | C1_2              | 111.7 (8)   |      |      |      |            |

<sup>1</sup>1-Y,1-Z,1-X; <sup>2</sup>1-X,1-Y,1-Z; <sup>3</sup>1-Z,1-X,1-Y; <sup>4</sup>+Y,+Z,+X; <sup>5</sup>+Z,+X,+Y; <sup>6</sup>1-X,-Y,1-Z; <sup>7</sup>1-Z,-1/2+X,1/2-Y; <sup>8</sup>1/2+Y,1/2-Z,1-X

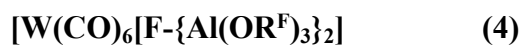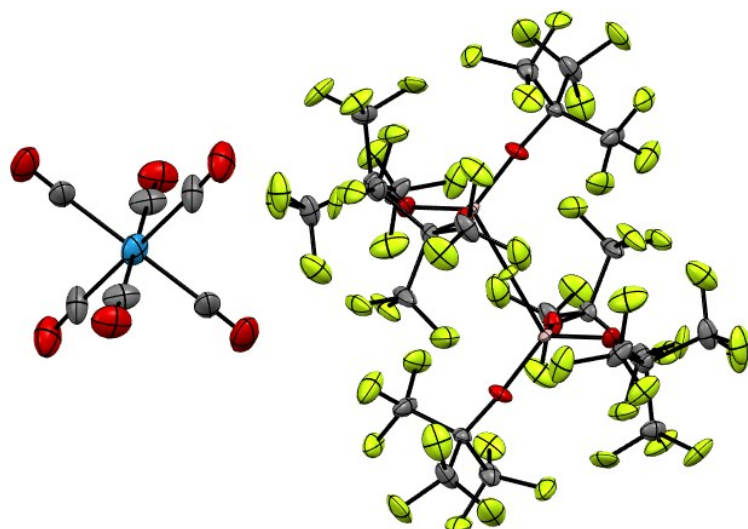

**Table 1 Crystal data and structure refinement for pa-3\_a.**

|                                                |                                                               |
|------------------------------------------------|---------------------------------------------------------------|
| CCDC Deposition Number                         | 1952383                                                       |
| Identification code                            | pa-3_a                                                        |
| Empirical formula                              | $\text{C}_{30}\text{O}_{12}\text{F}_{55}\text{Al}_2\text{W}$  |
| Formula weight                                 | 1835.11                                                       |
| Temperature/K                                  | 99.99                                                         |
| Crystal system                                 | cubic                                                         |
| Space group                                    | Pa-3                                                          |
| a/Å                                            | 17.3168(3)                                                    |
| b/Å                                            | 17.3168(3)                                                    |
| c/Å                                            | 17.3168(3)                                                    |
| $\alpha/^\circ$                                | 90                                                            |
| $\beta/^\circ$                                 | 90                                                            |
| $\gamma/^\circ$                                | 90                                                            |
| Volume/Å <sup>3</sup>                          | 5192.8(3)                                                     |
| Z                                              | 4                                                             |
| $\rho_{\text{calc}}/\text{cm}^3$               | 2.347                                                         |
| $\mu/\text{mm}^{-1}$                           | 2.513                                                         |
| F(000)                                         | 3484.0                                                        |
| Crystal size/mm <sup>3</sup>                   | 0.1 × 0.1 × 0.1                                               |
| Radiation                                      | MoK $\alpha$ ( $\lambda = 0.71073$ )                          |
| 2 $\theta$ range for data collection/ $^\circ$ | 4.074 to 56.328                                               |
| Index ranges                                   | $-23 \leq h \leq 23, -23 \leq k \leq 23, -23 \leq l \leq 23$  |
| Reflections collected                          | 184672                                                        |
| Independent reflections                        | 2130 [ $R_{\text{int}} = 0.0659, R_{\text{sigma}} = 0.0109$ ] |
| Data/restraints/parameters                     | 2130/1136/267                                                 |
| Goodness-of-fit on F <sup>2</sup>              | 1.375                                                         |
| Final R indexes [ $I \geq 2\sigma(I)$ ]        | $R_1 = 0.0762, wR_2 = 0.1448$                                 |
| Final R indexes [all data]                     | $R_1 = 0.0822, wR_2 = 0.1474$                                 |
| Largest diff. peak/hole / e Å <sup>-3</sup>    | 1.25/-1.20                                                    |

**Table 2 Fractional Atomic Coordinates ( $\times 10^4$ ) and Equivalent Isotropic Displacement Parameters ( $\text{\AA}^2 \times 10^3$ ) for pa-3\_a.  $U_{eq}$  is defined as 1/3 of the trace of the orthogonalised  $U_{ij}$  tensor.**

| Atom | x          | y          | z          | U(eq)     |
|------|------------|------------|------------|-----------|
| W1   | 5000       | 5000       | 5000       | 46.4 (3)  |
| O1   | 5864 (4)   | 6546 (4)   | 4450 (5)   | 64 (2)    |
| C1   | 5574 (5)   | 6018 (5)   | 4665 (6)   | 48 (2)    |
| F1   | 5000       | 10000      | 5000       | 21.8 (17) |
| All  | 4412.1 (9) | 9412.1 (9) | 5587.9 (9) | 11.8 (5)  |
| O1_2 | 4136 (13)  | 8661 (13)  | 5017 (16)  | 22.6 (15) |
| C1_2 | 3575 (8)   | 8303 (7)   | 4607 (7)   | 18.6 (12) |
| C2_2 | 3902 (8)   | 7526 (7)   | 4306 (7)   | 33 (3)    |
| F1_2 | 4614 (9)   | 7637 (16)  | 4033 (16)  | 50 (5)    |
| F2_2 | 3473 (10)  | 7221 (8)   | 3747 (9)   | 48 (4)    |
| F3_2 | 3951 (8)   | 7004 (6)   | 4867 (7)   | 50 (3)    |
| C3_2 | 2861 (7)   | 8130 (7)   | 5117 (7)   | 28 (3)    |
| F4_2 | 2440 (5)   | 8771 (7)   | 5221 (7)   | 38 (3)    |
| F5_2 | 3051 (19)  | 7872 (15)  | 5814 (9)   | 42 (5)    |
| F6_2 | 2397 (14)  | 7613 (15)  | 4778 (18)  | 41 (6)    |
| C4_2 | 3324 (7)   | 8805 (7)   | 3914 (8)   | 32 (3)    |
| F7_2 | 3227 (16)  | 9541 (9)   | 4126 (16)  | 45 (5)    |
| F8_2 | 2649 (7)   | 8572 (10)  | 3623 (9)   | 39 (4)    |
| F9_2 | 3829 (11)  | 8793 (11)  | 3341 (11)  | 53 (5)    |
| O1_1 | 4088 (10)  | 8718 (10)  | 4970 (12)  | 22.6 (15) |
| C1_1 | 3487 (6)   | 8379 (6)   | 4598 (6)   | 18.6 (12) |
| C2_1 | 3117 (6)   | 7754 (6)   | 5123 (6)   | 26 (2)    |
| F1_1 | 3574 (5)   | 7127 (4)   | 5163 (6)   | 37 (2)    |
| F2_1 | 2423 (10)  | 7537 (12)  | 4886 (13)  | 29 (3)    |
| F3_1 | 3046 (16)  | 8045 (12)  | 5834 (7)   | 36 (3)    |
| C3_1 | 2867 (5)   | 8985 (5)   | 4374 (5)   | 22 (2)    |
| F4_1 | 3200 (13)  | 9634 (7)   | 4132 (12)  | 39 (4)    |
| F5_1 | 2421 (4)   | 9166 (5)   | 4976 (5)   | 33.4 (18) |
| F6_1 | 2396 (6)   | 8739 (7)   | 3816 (6)   | 36 (3)    |
| C4_1 | 3813 (6)   | 8000 (6)   | 3858 (6)   | 29 (2)    |
| F7_1 | 3946 (9)   | 8522 (7)   | 3319 (7)   | 42 (3)    |
| F8_1 | 3317 (7)   | 7480 (7)   | 3571 (7)   | 44 (3)    |
| F9_1 | 4473 (7)   | 7630 (10)  | 4002 (11)  | 42 (3)    |

**Table 3 Anisotropic Displacement Parameters ( $\text{\AA}^2 \times 10^3$ ) for pa-3\_a. The Anisotropic displacement factor exponent takes the form:  $-2\pi^2[h^2a^2U_{11}+2hka*b*U_{12}+...]$ .**

| Atom | $U_{11}$  | $U_{22}$  | $U_{33}$  | $U_{23}$  | $U_{13}$  | $U_{12}$  |
|------|-----------|-----------|-----------|-----------|-----------|-----------|
| W1   | 46.4 (3)  | 46.4 (3)  | 46.4 (3)  | -11.9 (2) | -11.9 (2) | -11.9 (2) |
| O1   | 49 (4)    | 47 (4)    | 97 (6)    | -7 (4)    | -13 (4)   | -14 (3)   |
| C1   | 25 (4)    | 39 (4)    | 79 (6)    | -10 (4)   | -1 (4)    | -3 (3)    |
| F1   | 21.8 (17) | 21.8 (17) | 21.8 (17) | 8.1 (18)  | 8.1 (18)  | -8.1 (18) |
| All  | 11.8 (5)  | 11.8 (5)  | 11.8 (5)  | 2.7 (6)   | 2.7 (6)   | -2.7 (6)  |
| O1_2 | 16 (3)    | 21 (3)    | 31 (3)    | -7 (3)    | -5 (2)    | -4 (2)    |
| C1_2 | 16 (3)    | 17 (3)    | 23 (3)    | 0 (2)     | -4 (2)    | -5 (2)    |
| C2_2 | 36 (6)    | 28 (5)    | 35 (6)    | -11 (4)   | -17 (5)   | 7 (5)     |
| F1_2 | 39 (6)    | 61 (12)   | 50 (11)   | -11 (8)   | -4 (6)    | 20 (6)    |
| F2_2 | 65 (9)    | 36 (8)    | 43 (7)    | -21 (6)   | -23 (6)   | 0 (7)     |
| F3_2 | 69 (9)    | 26 (5)    | 53 (7)    | 0 (5)     | -23 (6)   | 12 (6)    |
| C3_2 | 19 (5)    | 37 (6)    | 27 (6)    | -2 (5)    | -3 (4)    | -5 (4)    |
| F4_2 | 11 (4)    | 50 (6)    | 53 (7)    | -9 (5)    | 7 (4)     | 0 (4)     |
| F5_2 | 42 (9)    | 57 (13)   | 28 (6)    | 17 (6)    | -5 (6)    | -25 (8)   |

|      |         |         |         |         |         |         |
|------|---------|---------|---------|---------|---------|---------|
| F6_2 | 37 (8)  | 42 (8)  | 43 (13) | 14 (8)  | -8 (7)  | -27 (7) |
| C4_2 | 26 (6)  | 30 (5)  | 40 (6)  | 20 (5)  | -12 (4) | -8 (5)  |
| F7_2 | 48 (12) | 28 (6)  | 59 (12) | 18 (6)  | -29 (8) | -2 (6)  |
| F8_2 | 33 (6)  | 49 (9)  | 36 (8)  | 18 (6)  | -20 (5) | -14 (6) |
| F9_2 | 44 (7)  | 75 (12) | 41 (7)  | 28 (8)  | 0 (5)   | -6 (8)  |
| O1_1 | 16 (3)  | 21 (3)  | 31 (3)  | -7 (3)  | -5 (2)  | -4 (2)  |
| C1_1 | 16 (3)  | 17 (3)  | 23 (3)  | 0 (2)   | -4 (2)  | -5 (2)  |
| C2_1 | 29 (5)  | 29 (5)  | 22 (5)  | 8 (4)   | -7 (4)  | -7 (4)  |
| F1_1 | 40 (5)  | 16 (3)  | 55 (6)  | 9 (3)   | -11 (4) | -10 (3) |
| F2_1 | 34 (5)  | 37 (6)  | 14 (4)  | 14 (4)  | -10 (4) | -17 (4) |
| F3_1 | 52 (8)  | 39 (7)  | 18 (4)  | 4 (4)   | 3 (4)   | -21 (6) |
| C3_1 | 18 (4)  | 22 (5)  | 28 (5)  | 6 (4)   | -2 (3)  | -6 (3)  |
| F4_1 | 47 (9)  | 20 (4)  | 52 (9)  | 12 (5)  | -2 (7)  | -13 (5) |
| F5_1 | 20 (4)  | 43 (5)  | 38 (4)  | 0 (4)   | 2 (3)   | 9 (3)   |
| F6_1 | 42 (6)  | 35 (5)  | 32 (5)  | 7 (4)   | -19 (4) | -5 (5)  |
| C4_1 | 28 (5)  | 28 (5)  | 32 (5)  | -9 (4)  | 4 (4)   | -8 (4)  |
| F7_1 | 45 (7)  | 58 (7)  | 24 (4)  | 1 (4)   | 12 (4)  | -18 (5) |
| F8_1 | 48 (6)  | 49 (7)  | 37 (6)  | -21 (5) | 1 (4)   | -22 (5) |
| F9_1 | 38 (5)  | 44 (7)  | 45 (7)  | -31 (5) | 5 (5)   | 9 (5)   |

**Table 4 Bond Lengths for pa-3\_a.**

| Atom Atom           | Length/Å   | Atom Atom | Length/Å   |
|---------------------|------------|-----------|------------|
| W1 C1 <sup>1</sup>  | 2.105 (9)  | C3_2 F6_2 | 1.338 (13) |
| W1 C1 <sup>2</sup>  | 2.105 (9)  | C4_2 F7_2 | 1.336 (13) |
| W1 C1 <sup>3</sup>  | 2.105 (9)  | C4_2 F8_2 | 1.336 (12) |
| W1 C1               | 2.105 (9)  | C4_2 F9_2 | 1.324 (13) |
| W1 C1 <sup>4</sup>  | 2.105 (9)  | O1_1 All  | 1.705 (9)  |
| W1 C1 <sup>5</sup>  | 2.105 (9)  | O1_1 C1_1 | 1.357 (11) |
| O1 C1               | 1.108 (11) | C1_1 C2_1 | 1.552 (11) |
| F1 All <sup>6</sup> | 1.763 (3)  | C1_1 C3_1 | 1.550 (11) |
| F1 All              | 1.763 (3)  | C1_1 C4_1 | 1.546 (11) |
| O1_2 All            | 1.703 (12) | C2_1 F1_1 | 1.345 (10) |
| O1_2 C1_2           | 1.353 (12) | C2_1 F2_1 | 1.325 (12) |
| C1_2 C2_2           | 1.550 (13) | C2_1 F3_1 | 1.337 (12) |
| C1_2 C3_2           | 1.548 (12) | C3_1 F4_1 | 1.330 (12) |
| C1_2 C4_2           | 1.545 (12) | C3_1 F5_1 | 1.335 (10) |
| C2_2 F1_2           | 1.333 (13) | C3_1 F6_1 | 1.335 (10) |
| C2_2 F2_2           | 1.329 (12) | C4_1 F7_1 | 1.320 (11) |
| C2_2 F3_2           | 1.329 (12) | C4_1 F8_1 | 1.339 (10) |
| C3_2 F4_2           | 1.339 (12) | C4_1 F9_1 | 1.333 (12) |
| C3_2 F5_2           | 1.329 (13) |           |            |

<sup>1</sup>+Y,+Z,+X; <sup>2</sup>+Z,+X,+Y; <sup>3</sup>1-X,1-Y,1-Z; <sup>4</sup>1-Z,1-X,1-Y; <sup>5</sup>1-Y,1-Z,1-X; <sup>6</sup>1-X,2-Y,1-Z

**Table 5 Bond Angles for pa-3\_a.**

| Atom Atom Atom                     | Angle/°  | Atom Atom Atom | Angle/°    |
|------------------------------------|----------|----------------|------------|
| C1 W1 C1 <sup>1</sup>              | 92.0 (4) | F2_2 C2_2 F1_2 | 108.4 (15) |
| C1 <sup>2</sup> W1 C1 <sup>3</sup> | 88.0 (4) | F3_2 C2_2 C1_2 | 111.5 (11) |
| C1 <sup>4</sup> W1 C1 <sup>5</sup> | 88.0 (4) | F3_2 C2_2 F1_2 | 107.3 (14) |
| C1 W1 C1 <sup>2</sup>              | 180.0    | F3_2 C2_2 F2_2 | 107.3 (12) |
| C1 <sup>1</sup> W1 C1 <sup>5</sup> | 180.0    | F4_2 C3_2 C1_2 | 110.6 (10) |
| C1 <sup>1</sup> W1 C1 <sup>2</sup> | 88.0 (4) | F5_2 C3_2 C1_2 | 112.6 (16) |
| C1 <sup>1</sup> W1 C1 <sup>3</sup> | 88.0 (4) | F5_2 C3_2 F4_2 | 107.0 (14) |

|                   |      |                   |            |      |      |      |            |
|-------------------|------|-------------------|------------|------|------|------|------------|
| C1                | W1   | C1 <sup>4</sup>   | 88.0 (4)   | F5_2 | C3_2 | F6_2 | 108.7 (16) |
| C1 <sup>4</sup>   | W1   | C1 <sup>3</sup>   | 180.0 (3)  | F6_2 | C3_2 | C1_2 | 111.0 (15) |
| C1 <sup>1</sup>   | W1   | C1 <sup>4</sup>   | 92.0 (4)   | F6_2 | C3_2 | F4_2 | 106.7 (15) |
| C1 <sup>2</sup>   | W1   | C1 <sup>5</sup>   | 92.0 (4)   | F7_2 | C4_2 | C1_2 | 111.0 (15) |
| C1 <sup>2</sup>   | W1   | C1 <sup>4</sup>   | 92.0 (4)   | F8_2 | C4_2 | C1_2 | 111.7 (11) |
| C1 <sup>3</sup>   | W1   | C1 <sup>5</sup>   | 92.0 (4)   | F8_2 | C4_2 | F7_2 | 106.4 (14) |
| C1                | W1   | C1 <sup>3</sup>   | 92.0 (4)   | F9_2 | C4_2 | C1_2 | 112.8 (12) |
| C1                | W1   | C1 <sup>5</sup>   | 88.0 (4)   | F9_2 | C4_2 | F7_2 | 107.7 (15) |
| O1                | C1   | W1                | 176.3 (9)  | F9_2 | C4_2 | F8_2 | 106.9 (14) |
| All <sup>6</sup>  | F1   | All               | 180.00 (8) | C1_1 | O1_1 | All  | 148.8 (15) |
| O1_2 <sup>7</sup> | All  | F1                | 105.6 (11) | O1_1 | C1_1 | C2_1 | 109.9 (12) |
| O1_2              | All  | F1                | 105.6 (11) | O1_1 | C1_1 | C3_1 | 110.9 (11) |
| O1_2 <sup>8</sup> | All  | F1                | 105.6 (11) | O1_1 | C1_1 | C4_1 | 107.3 (10) |
| O1_2 <sup>7</sup> | All  | O1_2 <sup>8</sup> | 113.1 (9)  | C3_1 | C1_1 | C2_1 | 109.4 (8)  |
| O1_2 <sup>7</sup> | All  | O1_2              | 113.1 (9)  | C4_1 | C1_1 | C2_1 | 109.8 (8)  |
| O1_2 <sup>8</sup> | All  | O1_2              | 113.1 (9)  | C4_1 | C1_1 | C3_1 | 109.5 (8)  |
| O1_2              | All  | O1_1 <sup>7</sup> | 109.5 (14) | F1_1 | C2_1 | C1_1 | 110.5 (8)  |
| O1_2 <sup>8</sup> | All  | O1_1 <sup>7</sup> | 118.2 (13) | F2_1 | C2_1 | C1_1 | 113.0 (12) |
| O1_2 <sup>7</sup> | All  | O1_1 <sup>7</sup> | 5.2 (16)   | F2_1 | C2_1 | F1_1 | 108.7 (12) |
| O1_1              | All  | F1                | 103.6 (9)  | F2_1 | C2_1 | F3_1 | 108.0 (14) |
| O1_1 <sup>8</sup> | All  | F1                | 103.6 (9)  | F3_1 | C2_1 | C1_1 | 108.4 (12) |
| O1_1 <sup>7</sup> | All  | F1                | 103.6 (9)  | F3_1 | C2_1 | F1_1 | 108.1 (11) |
| O1_1 <sup>8</sup> | All  | O1_1              | 114.7 (6)  | F4_1 | C3_1 | C1_1 | 110.5 (11) |
| O1_1 <sup>7</sup> | All  | O1_1              | 114.7 (6)  | F4_1 | C3_1 | F5_1 | 107.3 (11) |
| O1_1 <sup>7</sup> | All  | O1_1 <sup>8</sup> | 114.7 (6)  | F4_1 | C3_1 | F6_1 | 107.8 (12) |
| C1_2              | O1_2 | All               | 148.9 (18) | F5_1 | C3_1 | C1_1 | 111.4 (8)  |
| O1_2              | C1_2 | C2_2              | 108.1 (11) | F6_1 | C3_1 | C1_1 | 112.9 (9)  |
| O1_2              | C1_2 | C3_2              | 111.3 (15) | F6_1 | C3_1 | F5_1 | 106.7 (9)  |
| O1_2              | C1_2 | C4_2              | 110.5 (15) | F7_1 | C4_1 | C1_1 | 111.0 (9)  |
| C3_2              | C1_2 | C2_2              | 108.5 (10) | F7_1 | C4_1 | F8_1 | 108.0 (11) |
| C4_2              | C1_2 | C2_2              | 109.3 (10) | F7_1 | C4_1 | F9_1 | 108.2 (12) |
| C4_2              | C1_2 | C3_2              | 109.1 (10) | F8_1 | C4_1 | C1_1 | 111.1 (9)  |
| F1_2              | C2_2 | C1_2              | 109.5 (14) | F9_1 | C4_1 | C1_1 | 111.2 (11) |
| F2_2              | C2_2 | C1_2              | 112.6 (11) | F9_1 | C4_1 | F8_1 | 107.2 (11) |

<sup>1</sup>1-Y,1-Z,1-X; <sup>2</sup>1-X,1-Y,1-Z; <sup>3</sup>1-Z,1-X,1-Y; <sup>4</sup>+Z,+X,+Y; <sup>5</sup>+Y,+Z,+X; <sup>6</sup>1-X,2-Y,1-Z; <sup>7</sup>1-Z,1/2+X,3/2-Y; <sup>8</sup>-1/2+Y,3/2-Z,1-X

Comparison of structure metrics of the homoleptic carbonyl cation triad with their neutral congeners

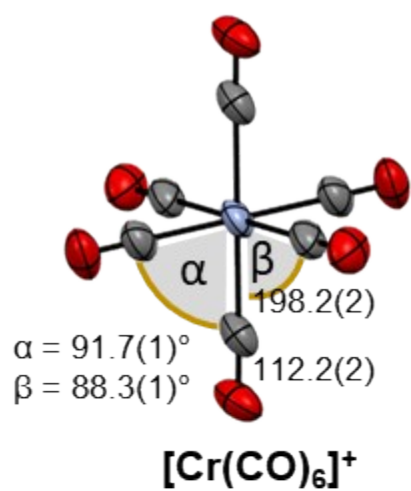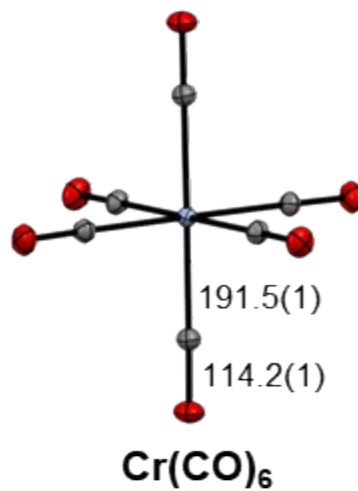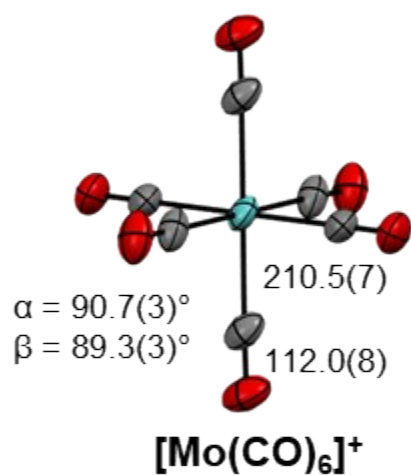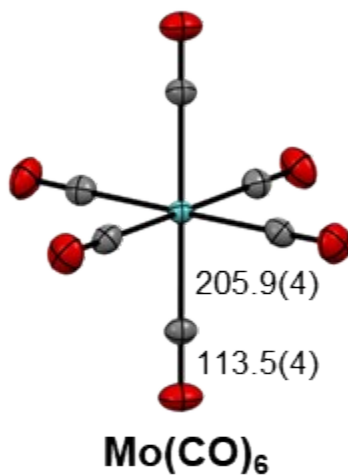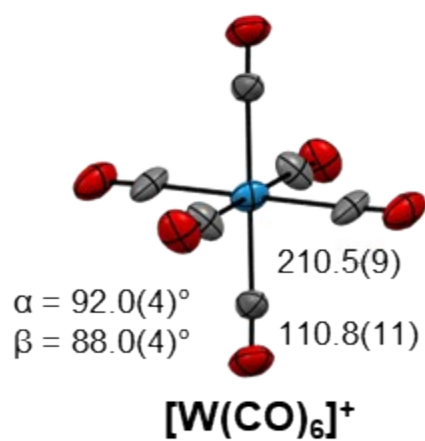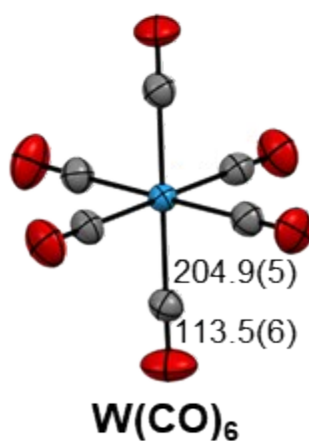

## 8. Single-Crystal XRD Data of the side Products

Due to space-saving reasons, for the side products only atomic coordinates are deposited here. For additional information, please check the CCDC numbers 1952378 to 1952389 .

### [Mo(CO)<sub>6</sub>][Al(OR<sup>F</sup>)<sub>4</sub>]

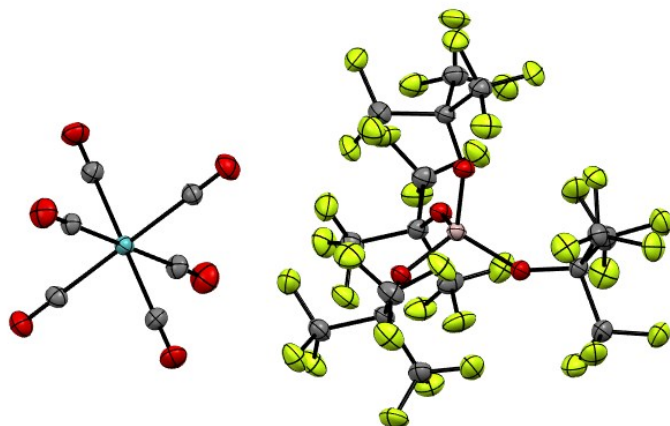

**Table 1 Crystal data and structure refinement for p4n\_a.**

|                                             |                                                               |
|---------------------------------------------|---------------------------------------------------------------|
| CCDC Deposition Number                      | 1952381                                                       |
| Identification code                         | p4n_a                                                         |
| Empirical formula                           | C <sub>22</sub> O <sub>10</sub> F <sub>36</sub> AlMo          |
| Formula weight                              | 1231.14                                                       |
| Temperature/K                               | 373.15                                                        |
| Crystal system                              | tetragonal                                                    |
| Space group                                 | P4/n                                                          |
| a/Å                                         | 13.7590(6)                                                    |
| b/Å                                         | 13.7590(6)                                                    |
| c/Å                                         | 9.5821(7)                                                     |
| α/°                                         | 90                                                            |
| β/°                                         | 90                                                            |
| γ/°                                         | 90                                                            |
| Volume/Å <sup>3</sup>                       | 1814.0(2)                                                     |
| Z                                           | 2                                                             |
| ρ <sub>calc</sub> /cm <sup>3</sup>          | 2.254                                                         |
| μ/mm <sup>-1</sup>                          | 0.624                                                         |
| F(000)                                      | 1182.0                                                        |
| Crystal size/mm <sup>3</sup>                | 0.2 × 0.2 × 0.2                                               |
| Radiation                                   | MoKα (λ = 0.71073)                                            |
| 2θ range for data collection/°              | 6.622 to 61.002                                               |
| Index ranges                                | -19 ≤ h ≤ 19, -19 ≤ k ≤ 19, -13 ≤ l ≤ 13                      |
| Reflections collected                       | 71711                                                         |
| Independent reflections                     | 2766 [R <sub>int</sub> = 0.0650, R <sub>sigma</sub> = 0.0175] |
| Data/restraints/parameters                  | 2766/0/163                                                    |
| Goodness-of-fit on F <sup>2</sup>           | 1.114                                                         |
| Final R indexes [I ≥ 2σ (I)]                | R <sub>1</sub> = 0.0380, wR <sub>2</sub> = 0.0932             |
| Final R indexes [all data]                  | R <sub>1</sub> = 0.0412, wR <sub>2</sub> = 0.0951             |
| Largest diff. peak/hole / e Å <sup>-3</sup> | 0.60/-1.43                                                    |



**Table 2 Fractional Atomic Coordinates ( $\times 10^4$ ) and Equivalent Isotropic Displacement Parameters ( $\text{\AA}^2 \times 10^3$ ) for p4n\_a.  $U_{\text{eq}}$  is defined as 1/3 of the trace of the orthogonalised  $U_{ij}$  tensor.**

| Atom | x           | y           | z          | U(eq)      |
|------|-------------|-------------|------------|------------|
| Mo1  | 7500        | 7500        | 6274.4 (4) | 22.34 (10) |
| Al1  | 7500        | 2500        | 10000      | 21.5 (2)   |
| O1   | 7500        | 7500        | 9625 (4)   | 48.9 (10)  |
| C1   | 7500        | 7500        | 8479 (5)   | 29.2 (9)   |
| O2   | 6496.3 (18) | 5371.6 (17) | 6277 (2)   | 38.4 (5)   |
| C2   | 6846 (2)    | 6103 (2)    | 6275 (3)   | 27.0 (5)   |
| C3   | 7500        | 7500        | 4061 (4)   | 24.4 (8)   |
| O3   | 7500        | 7500        | 2916 (4)   | 44.1 (9)   |
| O1_1 | 6680.4 (13) | 1850.2 (13) | 8994 (2)   | 26.7 (4)   |
| C1_1 | 5844.7 (18) | 1871.3 (19) | 8261 (3)   | 25.0 (5)   |
| C2_1 | 4967 (2)    | 2137 (2)    | 9215 (4)   | 32.3 (6)   |
| F1_1 | 5039.8 (14) | 1711.9 (14) | 10447 (2)  | 41.8 (4)   |
| F2_1 | 4115.5 (13) | 1871.1 (16) | 8653 (2)   | 43.6 (5)   |
| F3_1 | 4927.1 (14) | 3095.4 (14) | 9430 (2)   | 41.0 (5)   |
| C3_1 | 5905 (2)    | 2611 (2)    | 7035 (3)   | 34.9 (6)   |
| F4_1 | 6446.1 (16) | 2270.3 (16) | 5996 (2)   | 46.7 (5)   |
| F5_1 | 6297.7 (16) | 3442.6 (13) | 7469 (2)   | 44.5 (5)   |
| F6_1 | 5022.2 (16) | 2828.1 (14) | 6496 (2)   | 42.6 (4)   |
| C4_1 | 5670 (2)    | 839 (2)     | 7641 (3)   | 30.9 (5)   |
| F7_1 | 6494.2 (13) | 468.7 (14)  | 7121 (2)   | 41.9 (4)   |
| F8_1 | 5014.6 (15) | 833.4 (14)  | 6607 (2)   | 40.3 (4)   |
| F9_1 | 5360.1 (15) | 224.7 (13)  | 8621 (2)   | 39.2 (4)   |

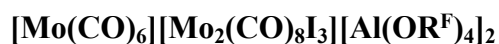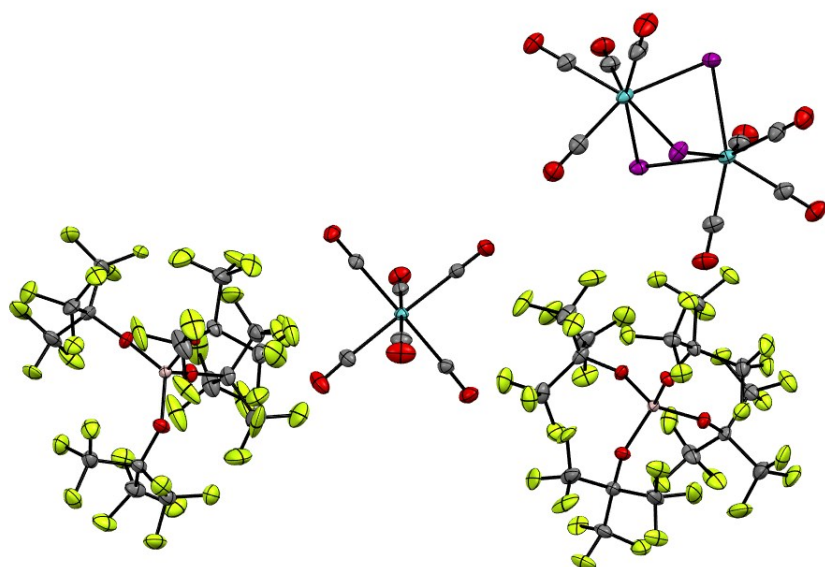

**Table 1 Crystal data and structure refinement for p21n\_a.**

|                                             |                                                                                                |
|---------------------------------------------|------------------------------------------------------------------------------------------------|
| CCDC Deposition Number                      | 1952380                                                                                        |
| Identification code                         | p21n_a                                                                                         |
| Empirical formula                           | C <sub>46</sub> O <sub>22</sub> F <sub>72</sub> Al <sub>2</sub> Mo <sub>3</sub> I <sub>3</sub> |
| Formula weight                              | 2994.95                                                                                        |
| Temperature/K                               | 100.01                                                                                         |
| Crystal system                              | monoclinic                                                                                     |
| Space group                                 | P2 <sub>1</sub> /n                                                                             |
| a/Å                                         | 13.9703(4)                                                                                     |
| b/Å                                         | 28.8124(9)                                                                                     |
| c/Å                                         | 20.6169(6)                                                                                     |
| α/°                                         | 90                                                                                             |
| β/°                                         | 90.4430(10)                                                                                    |
| γ/°                                         | 90                                                                                             |
| Volume/Å <sup>3</sup>                       | 8298.4(4)                                                                                      |
| Z                                           | 4                                                                                              |
| ρ <sub>calc</sub> /cm <sup>3</sup>          | 2.397                                                                                          |
| μ/mm <sup>-1</sup>                          | 1.812                                                                                          |
| F(000)                                      | 5644.0                                                                                         |
| Crystal size/mm <sup>3</sup>                | 0.2 × 0.15 × 0.15                                                                              |
| Radiation                                   | MoKα (λ = 0.71073)                                                                             |
| 2θ range for data collection/°              | 1.414 to 61.054                                                                                |
| Index ranges                                | -17 ≤ h ≤ 19, -41 ≤ k ≤ 40, -29 ≤ l ≤ 29                                                       |
| Reflections collected                       | 279748                                                                                         |
| Independent reflections                     | 25308 [R <sub>int</sub> = 0.0295, R <sub>sigma</sub> = 0.0191]                                 |
| Data/restraints/parameters                  | 25308/4922/2007                                                                                |
| Goodness-of-fit on F <sup>2</sup>           | 1.060                                                                                          |
| Final R indexes [I ≥ 2σ (I)]                | R <sub>1</sub> = 0.0340, wR <sub>2</sub> = 0.0837                                              |
| Final R indexes [all data]                  | R <sub>1</sub> = 0.0418, wR <sub>2</sub> = 0.0884                                              |
| Largest diff. peak/hole / e Å <sup>-3</sup> | 1.43/-1.21                                                                                     |

**Table 2 Fractional Atomic Coordinates ( $\times 10^4$ ) and Equivalent Isotropic Displacement Parameters ( $\text{\AA}^2 \times 10^3$ ) for p21n\_a.  $U_{\text{eq}}$  is defined as 1/3 of the trace of the orthogonalised  $U_{ij}$  tensor.**

| Atom  | x           | y           | z           | U(eq)      |
|-------|-------------|-------------|-------------|------------|
| I1    | 1087.0 (2)  | 9032.1 (2)  | 1877.1 (2)  | 31.55 (5)  |
| Mo1   | 7133.4 (2)  | 6211.2 (2)  | 2446.2 (2)  | 17.41 (4)  |
| Al1   | 7339.3 (5)  | 8723.6 (2)  | 4888.8 (4)  | 14.32 (13) |
| O1    | 8882.5 (18) | 5484.5 (9)  | 2362.1 (13) | 39.5 (6)   |
| C1    | 8261 (2)    | 5728.1 (10) | 2391.3 (15) | 27.0 (6)   |
| I2    | 2374.7 (2)  | 8716.6 (2)  | 3492.5 (2)  | 29.84 (5)  |
| Al2   | 7693.1 (5)  | 3739.3 (3)  | 4974.8 (4)  | 14.51 (13) |
| Mo2   | 2914.5 (2)  | 9287.7 (2)  | 2413.4 (2)  | 23.08 (5)  |
| O2    | 7208 (2)    | 6156.2 (12) | 4009.9 (12) | 46.9 (7)   |
| C2    | 7183 (2)    | 6177.1 (12) | 3472.5 (15) | 30.3 (6)   |
| Mo3   | 1832.5 (2)  | 8173.1 (2)  | 2380.0 (2)  | 24.08 (5)  |
| I3    | 3634.7 (2)  | 8446.7 (2)  | 1853.1 (2)  | 26.86 (4)  |
| O3    | 8765.4 (17) | 7004.1 (8)  | 2442.8 (12) | 33.3 (5)   |
| C3    | 8187 (2)    | 6732.7 (10) | 2447.0 (14) | 23.3 (5)   |
| O4    | 5430.5 (17) | 6967.3 (8)  | 2541.2 (12) | 33.5 (5)   |
| C4    | 6022 (2)    | 6707.0 (10) | 2506.3 (14) | 24.3 (5)   |
| O5    | 7097.3 (19) | 6244.7 (9)  | 879.4 (11)  | 35.4 (5)   |
| C5    | 7100 (2)    | 6234.5 (10) | 1421.4 (15) | 24.1 (5)   |
| O6    | 5532.5 (16) | 5400.8 (8)  | 2428.1 (12) | 30.6 (5)   |
| C6    | 6088 (2)    | 5681.3 (10) | 2436.4 (14) | 23.2 (5)   |
| O7    | 3152 (2)    | 9541.1 (11) | 928.3 (12)  | 45.0 (6)   |
| C7    | 3070 (2)    | 9456.5 (13) | 1453.9 (16) | 33.1 (7)   |
| O8    | 1501 (2)    | 9961.6 (9)  | 3163.9 (14) | 43.9 (6)   |
| C8    | 2011 (3)    | 9724.2 (11) | 2899.2 (16) | 32.9 (7)   |
| O9    | 3912 (2)    | 10259.7 (9) | 2407.2 (12) | 39.4 (6)   |
| C9    | 3546 (2)    | 9909.5 (12) | 2407.6 (15) | 31.3 (6)   |
| O10   | 4909.3 (19) | 9162.9 (11) | 3134.7 (12) | 42.5 (6)   |
| C10   | 4202 (2)    | 9209.2 (12) | 2884.2 (15) | 30.6 (6)   |
| O11   | 3292.2 (19) | 7506.6 (9)  | 3116.2 (12) | 38.6 (5)   |
| C11   | 2771 (2)    | 7739.7 (11) | 2855.3 (15) | 30.8 (6)   |
| O12   | 926.3 (19)  | 7182.8 (8)  | 2289.8 (12) | 36.6 (5)   |
| C12   | 1256 (2)    | 7540.5 (11) | 2320.5 (15) | 29.5 (6)   |
| O13   | 1553.8 (19) | 7979.6 (10) | 874.9 (12)  | 41.1 (6)   |
| C13   | 1652 (2)    | 8042.5 (12) | 1408.4 (16) | 32.1 (6)   |
| O14   | -152 (2)    | 8237.2 (11) | 3107.9 (17) | 55.3 (8)   |
| C14   | 554 (3)     | 8212.5 (13) | 2853.6 (18) | 37.8 (8)   |
| O1_14 | 8260 (20)   | 8450 (14)   | 5300 (20)   | 21 (6)     |
| C1_14 | 8787 (15)   | 8369 (6)    | 5834 (13)   | 20.6 (5)   |
| C2_14 | 8636 (12)   | 8773 (7)    | 6315 (9)    | 34 (4)     |
| F1_14 | 8590 (30)   | 9180 (14)   | 6040 (30)   | 45 (8)     |
| F2_14 | 9312 (17)   | 8810 (18)   | 6749 (13)   | 35 (5)     |
| F3_14 | 7845 (13)   | 8743 (7)    | 6637 (10)   | 38 (4)     |
| C3_14 | 8459 (13)   | 7903 (6)    | 6127 (8)    | 37 (4)     |
| F4_14 | 8774 (15)   | 7552 (6)    | 5804 (11)   | 45 (4)     |
| F5_14 | 7549 (17)   | 7805 (13)   | 6150 (20)   | 41 (6)     |
| F6_14 | 8781 (19)   | 7849 (9)    | 6719 (10)   | 50 (6)     |
| C4_14 | 9846 (13)   | 8344 (5)    | 5624 (8)    | 28 (3)     |
| F7_14 | 10050 (20)  | 8113 (8)    | 5102 (13)   | 31 (5)     |
| F8_14 | 10350 (20)  | 8156 (10)   | 6086 (15)   | 41 (6)     |
| F9_14 | 10180 (13)  | 8752 (6)    | 5508 (10)   | 42 (4)     |
| O1_13 | 7360 (15)   | 3333 (6)    | 4413 (9)    | 21.4 (4)   |
| C1_13 | 6936 (13)   | 2926 (7)    | 4247 (9)    | 23.0 (6)   |

|       |           |            |           |           |
|-------|-----------|------------|-----------|-----------|
| C2_13 | 7739 (18) | 2618 (8)   | 3954 (10) | 32 (4)    |
| F1_13 | 8310 (19) | 2861 (9)   | 3571 (12) | 48 (6)    |
| F2_13 | 7350 (20) | 2279 (9)   | 3612 (14) | 50 (7)    |
| F3_13 | 8292 (16) | 2430 (8)   | 4414 (10) | 36 (5)    |
| C3_13 | 6520 (14) | 2705 (7)   | 4871 (12) | 31 (4)    |
| F4_13 | 5700 (14) | 2902 (8)   | 5046 (15) | 44 (6)    |
| F5_13 | 7120 (14) | 2751 (7)   | 5370 (9)  | 31 (4)    |
| F6_13 | 6345 (19) | 2258 (7)   | 4788 (15) | 53 (7)    |
| C4_13 | 6134 (17) | 3031 (8)   | 3743 (12) | 33 (4)    |
| F7_13 | 5619 (17) | 3391 (8)   | 3935 (16) | 39 (6)    |
| F8_13 | 5550 (20) | 2672 (11)  | 3650 (20) | 49 (8)    |
| F9_13 | 6501 (18) | 3133 (10)  | 3175 (11) | 52 (6)    |
| O1_12 | 6679 (13) | 3956 (6)   | 5338 (12) | 19.5 (8)  |
| C1_12 | 6171 (12) | 4116 (5)   | 5847 (9)  | 23.9 (5)  |
| C2_12 | 6511 (8)  | 4602 (4)   | 6063 (6)  | 35 (3)    |
| F1_12 | 7453 (9)  | 4628 (5)   | 6085 (9)  | 65 (4)    |
| F2_12 | 6191 (9)  | 4711 (5)   | 6651 (5)  | 60 (3)    |
| F3_12 | 6180 (20) | 4906 (9)   | 5626 (10) | 54 (6)    |
| C3_12 | 5101 (10) | 4135 (5)   | 5649 (7)  | 45 (3)    |
| F4_12 | 4781 (14) | 3698 (6)   | 5670 (9)  | 56.1 (10) |
| F5_12 | 4999 (14) | 4322 (6)   | 5070 (8)  | 67 (4)    |
| F6_12 | 4587 (12) | 4386 (5)   | 6063 (10) | 54 (4)    |
| C4_12 | 6317 (10) | 3772 (5)   | 6416 (7)  | 49 (3)    |
| F7_12 | 6293 (14) | 3339 (5)   | 6198 (10) | 76 (5)    |
| F8_12 | 5638 (9)  | 3823 (4)   | 6853 (7)  | 61.8 (11) |
| F9_12 | 7190 (16) | 3866 (10)  | 6650 (18) | 55 (5)    |
| O1_11 | 7650 (30) | 9281 (7)   | 4673 (19) | 21.1 (9)  |
| C1_11 | 8112 (15) | 9563 (6)   | 4253 (11) | 20.0 (8)  |
| C2_11 | 7455 (12) | 9648 (5)   | 3664 (9)  | 27.6 (14) |
| F1_11 | 7416 (10) | 9267 (5)   | 3278 (5)  | 45 (3)    |
| F2_11 | 7740 (30) | 10014 (7)  | 3308 (14) | 46 (6)    |
| F3_11 | 6554 (7)  | 9735 (5)   | 3830 (7)  | 51 (4)    |
| C3_11 | 8330 (11) | 10022 (6)  | 4604 (9)  | 32 (3)    |
| F4_11 | 8695 (11) | 9948 (5)   | 5194 (7)  | 52 (4)    |
| F5_11 | 7544 (9)  | 10282 (4)  | 4642 (9)  | 58 (4)    |
| F6_11 | 8990 (20) | 10272 (14) | 4284 (18) | 44 (6)    |
| C4_11 | 9032 (15) | 9327 (6)   | 4025 (10) | 30 (3)    |
| F7_11 | 9724 (14) | 9357 (6)   | 4473 (9)  | 39 (3)    |
| F8_11 | 9390 (30) | 9492 (10)  | 3465 (12) | 36 (4)    |
| F9_11 | 8903 (10) | 8872 (5)   | 3918 (8)  | 35 (3)    |
| O1_10 | 7670 (20) | 9270 (6)   | 4638 (16) | 21.1 (9)  |
| C1_10 | 8131 (11) | 9529 (6)   | 4198 (9)  | 20.0 (8)  |
| C2_10 | 7392 (8)  | 9761 (3)   | 3729 (6)  | 27.6 (14) |
| F1_10 | 6791 (11) | 9431 (6)   | 3507 (13) | 33 (3)    |
| F2_10 | 7821 (15) | 9930 (4)   | 3192 (8)  | 32 (3)    |
| F3_10 | 6928 (6)  | 10107 (3)  | 4011 (4)  | 40.8 (18) |
| C3_10 | 8684 (7)  | 9923 (3)   | 4562 (5)  | 36 (2)    |
| F4_10 | 9478 (6)  | 9744 (3)   | 4836 (5)  | 64 (3)    |
| F5_10 | 8117 (13) | 10095 (9)  | 5024 (8)  | 46 (4)    |
| F6_10 | 8935 (18) | 10269 (10) | 4163 (14) | 47 (6)    |
| C4_10 | 8873 (7)  | 9245 (3)   | 3796 (5)  | 32.4 (19) |
| F7_10 | 9373 (17) | 8953 (5)   | 4177 (11) | 41 (3)    |
| F8_10 | 9505 (18) | 9535 (9)   | 3514 (11) | 47 (5)    |
| F9_10 | 8416 (7)  | 9008 (3)   | 3326 (5)  | 44 (2)    |

|      |             |             |             |           |
|------|-------------|-------------|-------------|-----------|
| O1_9 | 8010 (20)   | 4033 (10)   | 4283 (10)   | 25.0 (10) |
| C1_9 | 8146 (8)    | 4439 (7)    | 3970 (7)    | 24.4 (7)  |
| C2_9 | 7188 (6)    | 4675 (3)    | 3844 (4)    | 31.2 (15) |
| F1_9 | 6509 (10)   | 4383 (5)    | 3642 (7)    | 65 (4)    |
| F2_9 | 7250 (17)   | 4997 (5)    | 3368 (8)    | 46 (3)    |
| F3_9 | 6878 (5)    | 4891 (2)    | 4359 (3)    | 49.9 (18) |
| C3_9 | 8801 (7)    | 4756 (3)    | 4361 (6)    | 52 (2)    |
| F4_9 | 9719 (5)    | 4629 (3)    | 4321 (6)    | 90 (3)    |
| F5_9 | 8558 (12)   | 4734 (4)    | 4981 (6)    | 67 (4)    |
| F6_9 | 8735 (15)   | 5196 (5)    | 4164 (11)   | 66 (5)    |
| C4_9 | 8670 (8)    | 4321 (4)    | 3345 (6)    | 40.6 (13) |
| F7_9 | 9347 (8)    | 4007 (3)    | 3434 (5)    | 71 (3)    |
| F8_9 | 9084 (17)   | 4696 (6)    | 3073 (11)   | 71 (5)    |
| F9_9 | 8063 (8)    | 4149 (2)    | 2894 (3)    | 80 (3)    |
| O1_8 | 7700 (20)   | 9262 (5)    | 4619 (13)   | 21.1 (9)  |
| C1_8 | 8183 (10)   | 9508 (5)    | 4169 (7)    | 20.0 (8)  |
| C2_8 | 9247 (7)    | 9345 (4)    | 4133 (5)    | 32 (2)    |
| F1_8 | 9738 (7)    | 9502 (4)    | 4637 (5)    | 48 (2)    |
| F2_8 | 9691 (11)   | 9484 (7)    | 3593 (9)    | 47 (3)    |
| F3_8 | 9246 (16)   | 8882 (5)    | 4134 (9)    | 44 (4)    |
| C3_8 | 7697 (6)    | 9452 (3)    | 3490 (4)    | 29.7 (15) |
| F4_8 | 6749 (9)    | 9474 (6)    | 3558 (11)   | 49 (4)    |
| F5_8 | 7980 (8)    | 9051 (3)    | 3221 (4)    | 53 (2)    |
| F6_8 | 7961 (9)    | 9797 (3)    | 3085 (5)    | 38 (2)    |
| C4_8 | 8149 (6)    | 10027 (3)   | 4367 (4)    | 26.7 (15) |
| F7_8 | 7291 (5)    | 10208 (2)   | 4230 (4)    | 45.2 (17) |
| F8_8 | 8805 (11)   | 10281 (6)   | 4048 (9)    | 36 (3)    |
| F9_8 | 8337 (11)   | 10081 (8)   | 4996 (6)    | 40 (3)    |
| O1_7 | 6434.3 (14) | 8788.9 (6)  | 5444.1 (9)  | 19.6 (4)  |
| C1_7 | 5615.7 (19) | 9006.0 (9)  | 5602.5 (12) | 19.4 (5)  |
| C2_7 | 4888 (2)    | 9004.5 (10) | 5029.4 (14) | 25.6 (5)  |
| F1_7 | 5327.3 (15) | 9122.6 (8)  | 4485.1 (9)  | 37.4 (4)  |
| F2_7 | 4165.3 (14) | 9299.5 (7)  | 5115.8 (11) | 37.4 (4)  |
| F3_7 | 4515.8 (14) | 8583.4 (7)  | 4941.2 (9)  | 31.9 (4)  |
| C3_7 | 5177 (2)    | 8736.2 (10) | 6185.0 (13) | 23.0 (5)  |
| F4_7 | 5622.3 (14) | 8838.4 (7)  | 6737.1 (8)  | 32.5 (4)  |
| F5_7 | 5238.5 (13) | 8283.2 (6)  | 6094.2 (9)  | 27.6 (4)  |
| F6_7 | 4242.3 (13) | 8837.5 (7)  | 6265.6 (9)  | 32.0 (4)  |
| C4_7 | 5821 (2)    | 9515.5 (10) | 5812.3 (15) | 29.2 (6)  |
| F7_7 | 6608.7 (15) | 9539.6 (7)  | 6177.8 (10) | 36.7 (4)  |
| F8_7 | 5106.3 (15) | 9701.0 (7)  | 6155.1 (11) | 40.6 (5)  |
| F9_7 | 5962.1 (16) | 9783.6 (6)  | 5295.6 (11) | 38.6 (5)  |
| O1_6 | 8252 (4)    | 8430 (2)    | 5284 (3)    | 19.2 (10) |
| C1_6 | 8748 (3)    | 8376.0 (14) | 5845 (3)    | 20.6 (5)  |
| C2_6 | 9555 (3)    | 8015.6 (13) | 5719.6 (18) | 33.0 (8)  |
| F1_6 | 9207 (3)    | 7590.2 (11) | 5691 (2)    | 53.8 (10) |
| F2_6 | 10243 (4)   | 8026.7 (16) | 6179 (2)    | 41.6 (11) |
| F3_6 | 9953 (4)    | 8095 (2)    | 5158 (2)    | 55.5 (15) |
| C3_6 | 9209 (3)    | 8835.8 (13) | 6072 (2)    | 38.8 (10) |
| F4_6 | 8600 (6)    | 9182 (2)    | 6006 (5)    | 57.3 (19) |
| F5_6 | 9957 (3)    | 8942.2 (13) | 5711 (2)    | 59.9 (11) |
| F6_6 | 9525 (4)    | 8817 (3)    | 6684 (3)    | 56.8 (16) |
| C4_6 | 8091 (3)    | 8195.0 (17) | 6392.6 (18) | 39.8 (10) |
| F7_6 | 7592 (3)    | 8531.0 (19) | 6658.8 (17) | 61.2 (12) |

|      |             |             |             |           |
|------|-------------|-------------|-------------|-----------|
| F8_6 | 8590 (4)    | 7985 (2)    | 6870.3 (18) | 59.0 (14) |
| F9_6 | 7468 (3)    | 7902 (2)    | 6153 (4)    | 59.3 (17) |
| O1_5 | 7016.8 (14) | 8398.7 (6)  | 4221.9 (9)  | 20.8 (4)  |
| C1_5 | 6884 (2)    | 7981.4 (9)  | 3939.3 (13) | 23.0 (5)  |
| C2_5 | 7699 (2)    | 7631.7 (10) | 4130.0 (15) | 30.6 (6)  |
| F1_5 | 8542.5 (14) | 7832.8 (7)  | 4107.4 (10) | 36.0 (4)  |
| F2_5 | 7721.0 (18) | 7264.9 (7)  | 3723.7 (11) | 45.3 (5)  |
| F3_5 | 7559.7 (18) | 7469.3 (7)  | 4725.5 (10) | 40.5 (5)  |
| C3_5 | 5910 (3)    | 7770.2 (12) | 4143.5 (16) | 35.3 (7)  |
| F4_5 | 5188.6 (15) | 7998.3 (9)  | 3849.0 (12) | 49.7 (6)  |
| F5_5 | 5791.6 (16) | 7810.4 (7)  | 4779.4 (10) | 39.8 (5)  |
| F6_5 | 5834.4 (18) | 7321.1 (8)  | 3990.9 (12) | 50.9 (6)  |
| C4_5 | 6905 (2)    | 8057.2 (11) | 3193.3 (15) | 32.4 (6)  |
| F7_5 | 6378.1 (18) | 8424.9 (8)  | 3030.0 (10) | 44.1 (5)  |
| F8_5 | 6548.1 (19) | 7692.1 (8)  | 2865.8 (10) | 49.2 (6)  |
| F9_5 | 7794.3 (16) | 8116.1 (8)  | 2992.1 (9)  | 41.8 (5)  |
| O1_4 | 7972 (15)   | 4007 (7)    | 4256 (7)    | 25.0 (10) |
| C1_4 | 8056 (6)    | 4411 (5)    | 3932 (5)    | 24.4 (7)  |
| C2_4 | 7134 (5)    | 4484 (2)    | 3505 (3)    | 41.0 (13) |
| F1_4 | 7121 (4)    | 4181.9 (16) | 3020 (2)    | 63.1 (15) |
| F2_4 | 7088 (13)   | 4910 (4)    | 3257 (6)    | 53 (3)    |
| F3_4 | 6373 (7)    | 4416 (4)    | 3869 (4)    | 51.7 (19) |
| C3_4 | 8183 (4)    | 4846.1 (19) | 4371 (3)    | 36.5 (12) |
| F4_4 | 8776 (7)    | 4748 (4)    | 4854 (4)    | 61 (2)    |
| F5_4 | 7352 (4)    | 4977.6 (14) | 4619 (2)    | 47.1 (11) |
| F6_4 | 8531 (10)   | 5208 (3)    | 4047 (7)    | 58 (3)    |
| C4_4 | 8949 (6)    | 4363 (3)    | 3480 (4)    | 40.6 (13) |
| F7_4 | 9740 (3)    | 4423.5 (17) | 3825 (3)    | 55.2 (12) |
| F8_4 | 8897 (13)   | 4654 (5)    | 2978 (7)    | 68 (3)    |
| F9_4 | 8981 (4)    | 3945.8 (19) | 3219 (3)    | 40.3 (11) |
| O1_3 | 6756 (3)    | 4044.9 (13) | 5307 (3)    | 19.5 (8)  |
| C1_3 | 6190 (4)    | 4099.6 (18) | 5830 (3)    | 23.9 (5)  |
| C2_3 | 6788 (3)    | 4186.5 (17) | 6455.0 (19) | 36.3 (9)  |
| F1_3 | 7133 (5)    | 3784 (3)    | 6704 (5)    | 48.9 (16) |
| F2_3 | 6274 (2)    | 4392.4 (16) | 6924.7 (15) | 59.4 (11) |
| F3_3 | 7515 (2)    | 4469.9 (14) | 6326.7 (18) | 42.4 (8)  |
| C3_3 | 5542 (3)    | 4529.5 (14) | 5693 (2)    | 32.6 (9)  |
| F4_3 | 5200 (4)    | 4512.5 (14) | 5092.9 (19) | 42.3 (9)  |
| F5_3 | 6054 (6)    | 4925 (3)    | 5764 (3)    | 43.5 (13) |
| F6_3 | 4793 (3)    | 4552.7 (16) | 6096 (2)    | 46.0 (10) |
| C4_3 | 5535 (3)    | 3666.9 (16) | 5932 (2)    | 41.3 (11) |
| F7_3 | 4860 (3)    | 3648.1 (16) | 5452 (2)    | 56.1 (10) |
| F8_3 | 5098 (3)    | 3682.7 (12) | 6513 (2)    | 61.8 (11) |
| F9_3 | 6048 (3)    | 3282.7 (13) | 5919 (2)    | 45.3 (10) |
| O1_2 | 7434.4 (16) | 3164.6 (7)  | 4804.8 (10) | 21.4 (4)  |
| C1_2 | 7113 (2)    | 2856.0 (10) | 4362.8 (15) | 23.0 (6)  |
| C2_2 | 6087 (3)    | 2979.8 (12) | 4133 (2)    | 35.3 (8)  |
| F1_2 | 5450.0 (17) | 2872.9 (10) | 4588.4 (16) | 48.4 (6)  |
| F2_2 | 5828 (3)    | 2757.6 (13) | 3588 (2)    | 51.8 (9)  |
| F3_2 | 6014 (2)    | 3433.6 (9)  | 4017.3 (14) | 40.9 (6)  |
| C3_2 | 7797 (3)    | 2833.4 (12) | 3770.0 (17) | 30.6 (7)  |
| F4_2 | 8699.0 (16) | 2870.9 (8)  | 3954.8 (12) | 38.7 (5)  |
| F5_2 | 7611 (2)    | 3181.0 (8)  | 3364.5 (10) | 43.5 (6)  |
| F6_2 | 7708 (2)    | 2438.9 (9)  | 3434.0 (13) | 41.3 (6)  |

|      |              |             |             |          |
|------|--------------|-------------|-------------|----------|
| C4_2 | 7096 (3)     | 2368.6 (11) | 4700.5 (19) | 33.1 (7) |
| F7_2 | 7982.5 (17)  | 2198.1 (7)  | 4753.4 (13) | 40.8 (6) |
| F8_2 | 6588.0 (17)  | 2062.4 (8)  | 4343.6 (14) | 43.7 (6) |
| F9_2 | 6733.7 (19)  | 2391.2 (8)  | 5280.8 (12) | 44.2 (6) |
| O1_1 | 8605.3 (15)  | 3735.3 (7)  | 5539.8 (10) | 24.5 (4) |
| C1_1 | 9437.0 (19)  | 3548.9 (10) | 5747.9 (13) | 21.6 (5) |
| C2_1 | 9306 (2)     | 3033.6 (10) | 5953.9 (14) | 27.6 (6) |
| F1_1 | 8480.5 (15)  | 2977.6 (7)  | 6256.5 (10) | 36.8 (4) |
| F2_1 | 10004.6 (16) | 2887.1 (7)  | 6355.7 (10) | 38.0 (4) |
| F3_1 | 9304.7 (16)  | 2754.5 (7)  | 5440.5 (10) | 37.4 (4) |
| C3_1 | 10223 (2)    | 3580.1 (12) | 5216.8 (15) | 31.4 (6) |
| F4_1 | 10543.7 (16) | 4011.8 (8)  | 5153.7 (11) | 43.8 (5) |
| F5_1 | 9862.7 (15)  | 3452.2 (8)  | 4645.7 (9)  | 38.0 (5) |
| F6_1 | 10970.1 (14) | 3307.2 (8)  | 5346.0 (11) | 42.9 (5) |
| C4_1 | 9764 (2)     | 3838.3 (11) | 6345.2 (14) | 27.5 (6) |
| F7_1 | 9657.4 (15)  | 4287.9 (7)  | 6241.8 (10) | 34.1 (4) |
| F8_1 | 10692.9 (14) | 3767.3 (8)  | 6496.5 (11) | 39.9 (5) |
| F9_1 | 9258.3 (15)  | 3728.8 (7)  | 6865.4 (9)  | 33.8 (4) |

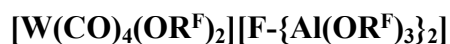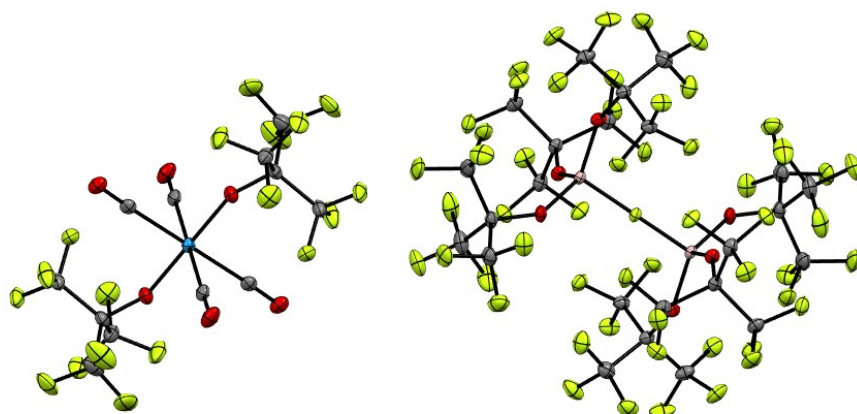

**Table 1 Crystal data and structure refinement for p-1\_a.**

|                                               |                                                               |
|-----------------------------------------------|---------------------------------------------------------------|
| CCDC Deposition Number                        | 1952382                                                       |
| Identification code                           | p-1_a                                                         |
| Empirical formula                             | $\text{C}_{36}\text{O}_{12}\text{F}_{73}\text{Al}_2\text{W}$  |
| Formula weight                                | 2249.17                                                       |
| Temperature/K                                 | 99.95                                                         |
| Crystal system                                | triclinic                                                     |
| Space group                                   | P-1                                                           |
| $a/\text{\AA}$                                | 11.5888(8)                                                    |
| $b/\text{\AA}$                                | 11.5986(8)                                                    |
| $c/\text{\AA}$                                | 12.7755(8)                                                    |
| $\alpha/^\circ$                               | 82.965(2)                                                     |
| $\beta/^\circ$                                | 67.136(2)                                                     |
| $\gamma/^\circ$                               | 87.863(2)                                                     |
| Volume/ $\text{\AA}^3$                        | 1570.27(18)                                                   |
| Z                                             | 1                                                             |
| $\rho_{\text{calc}}/\text{g cm}^{-3}$         | 2.378                                                         |
| $\mu/\text{mm}^{-1}$                          | 2.141                                                         |
| F(000)                                        | 1069.0                                                        |
| Crystal size/ $\text{mm}^3$                   | $0.1 \times 0.08 \times 0.06$                                 |
| Radiation                                     | MoK $\alpha$ ( $\lambda = 0.71073$ )                          |
| $2\theta$ range for data collection/ $^\circ$ | 3.484 to 54.32                                                |
| Index ranges                                  | $-14 \leq h \leq 14, -14 \leq k \leq 14, -16 \leq l \leq 16$  |
| Reflections collected                         | 37611                                                         |
| Independent reflections                       | 6968 [ $R_{\text{int}} = 0.0367, R_{\text{sigma}} = 0.0295$ ] |
| Data/restraints/parameters                    | 6968/0/562                                                    |
| Goodness-of-fit on $F^2$                      | 0.993                                                         |
| Final R indexes [ $I \geq 2\sigma(I)$ ]       | $R_1 = 0.0242, wR_2 = 0.0532$                                 |
| Final R indexes [all data]                    | $R_1 = 0.0274, wR_2 = 0.0548$                                 |
| Largest diff. peak/hole / $e \text{\AA}^{-3}$ | 0.96/-0.62                                                    |



**Table 2 Fractional Atomic Coordinates ( $\times 10^4$ ) and Equivalent Isotropic Displacement Parameters ( $\text{\AA}^2 \times 10^3$ ) for p-1\_a.  $U_{\text{eq}}$  is defined as 1/3 of the trace of the orthogonalised  $U_{ij}$  tensor.**

| Atom | x            | y            | z            | $U_{\text{eq}}$ |
|------|--------------|--------------|--------------|-----------------|
| W1   | 10000        | 5000         | 10000        | 13.97 (5)       |
| O1   | 9959.3 (16)  | 7424.2 (15)  | 11056.3 (14) | 21.9 (4)        |
| C1   | 9991 (2)     | 6584 (2)     | 10702.3 (19) | 16.8 (5)        |
| F1   | 5000         | 0            | 5000         | 12.9 (4)        |
| Al1  | 4602.1 (6)   | 820.1 (6)    | 6173.7 (5)   | 10.70 (13)      |
| C2   | 11552 (2)    | 5573 (2)     | 8434 (2)     | 17.8 (5)        |
| O2   | 12348.5 (17) | 5861.8 (16)  | 7622.4 (15)  | 26.6 (4)        |
| O1_4 | 8853.6 (15)  | 5728.9 (15)  | 9407.7 (14)  | 19.9 (4)        |
| C1_4 | 8207 (2)     | 5971 (2)     | 8694 (2)     | 17.6 (5)        |
| C2_4 | 8503 (2)     | 7257 (2)     | 8146 (2)     | 22.7 (5)        |
| F1_4 | 8508.8 (16)  | 7920.9 (13)  | 8916.7 (14)  | 34.0 (4)        |
| F2_4 | 7672.7 (16)  | 7651.0 (14)  | 7724.9 (14)  | 34.4 (4)        |
| F3_4 | 9632.5 (15)  | 7335.4 (14)  | 7312.1 (14)  | 35.2 (4)        |
| C3_4 | 8624 (2)     | 5133 (2)     | 7765 (2)     | 21.7 (5)        |
| F4_4 | 8199.2 (17)  | 4062.9 (13)  | 8240.6 (15)  | 35.6 (4)        |
| F5_4 | 9862.9 (14)  | 5073.9 (14)  | 7307.0 (13)  | 30.7 (4)        |
| F6_4 | 8211.9 (15)  | 5447.2 (13)  | 6945.5 (13)  | 28.8 (4)        |
| C4_4 | 6790 (2)     | 5810 (3)     | 9463 (2)     | 30.8 (6)        |
| F7_4 | 6609.5 (16)  | 4844.6 (18)  | 10177.1 (16) | 51.2 (5)        |
| F8_4 | 6114.4 (14)  | 5744.9 (17)  | 8836.2 (15)  | 41.2 (4)        |
| F9_4 | 6380.9 (15)  | 6689.7 (19)  | 10077.0 (14) | 46.5 (5)        |
| O1_3 | 4076.0 (14)  | -102.3 (13)  | 7416.7 (13)  | 13.9 (3)        |
| C1_3 | 3082 (2)     | -585.0 (19)  | 8323.3 (18)  | 14.2 (5)        |
| C2_3 | 2534 (2)     | 284 (2)      | 9234 (2)     | 19.0 (5)        |
| F1_3 | 3280.6 (14)  | 379.1 (13)   | 9790.0 (12)  | 25.2 (3)        |
| F2_3 | 1401.3 (13)  | -55.2 (13)   | 10005.3 (12) | 26.0 (3)        |
| F3_3 | 2431.1 (13)  | 1332.8 (12)  | 8732.8 (12)  | 23.4 (3)        |
| C3_3 | 2037 (2)     | -941 (2)     | 7936 (2)     | 19.0 (5)        |
| F4_3 | 2541.4 (13)  | -1344.1 (13) | 6928.1 (12)  | 24.9 (3)        |
| F5_3 | 1324.7 (13)  | -47.0 (13)   | 7838.7 (13)  | 24.9 (3)        |
| F6_3 | 1273.7 (13)  | -1783.2 (13) | 8677.4 (12)  | 25.1 (3)        |
| C4_3 | 3552 (2)     | -1678 (2)    | 8869.8 (19)  | 17.7 (5)        |
| F7_3 | 3723.7 (13)  | -2561.1 (12) | 8237.8 (12)  | 22.5 (3)        |
| F8_3 | 2730.2 (14)  | -2058.7 (13) | 9921.3 (11)  | 24.6 (3)        |
| F9_3 | 4630.9 (13)  | -1475.6 (12) | 8939.6 (12)  | 22.4 (3)        |
| O1_2 | 6034.1 (14)  | 1400.9 (14)  | 5921.6 (13)  | 15.6 (3)        |
| C1_2 | 6661 (2)     | 1955 (2)     | 6430 (2)     | 16.4 (5)        |
| C2_2 | 6936 (3)     | 1107 (2)     | 7333 (2)     | 26.4 (6)        |
| F1_2 | 5914.5 (16)  | 940.5 (16)   | 8297.7 (13)  | 37.3 (4)        |
| F2_2 | 7849.0 (16)  | 1498.2 (15)  | 7596.9 (14)  | 34.8 (4)        |
| F3_2 | 7283.4 (18)  | 78.2 (14)    | 6960.3 (16)  | 38.3 (4)        |
| C3_2 | 7916 (2)     | 2423 (2)     | 5472 (2)     | 22.3 (5)        |
| F4_2 | 7732.7 (14)  | 2933.1 (13)  | 4558.4 (12)  | 28.4 (3)        |
| F5_2 | 8711.5 (14)  | 1561.5 (14)  | 5137.6 (14)  | 32.9 (4)        |
| F6_2 | 8464.8 (14)  | 3208.0 (13)  | 5821.1 (13)  | 28.9 (4)        |
| C4_2 | 5885 (2)     | 2992 (2)     | 7003 (2)     | 24.1 (6)        |
| F7_2 | 5947.4 (15)  | 3894.6 (13)  | 6234.6 (15)  | 34.2 (4)        |
| F8_2 | 6256.7 (15)  | 3346.3 (15)  | 7777.4 (14)  | 36.6 (4)        |
| F9_2 | 4678.3 (13)  | 2673.1 (14)  | 7539.8 (13)  | 29.6 (4)        |
| O1_1 | 3419.2 (15)  | 1701.6 (14)  | 6097.1 (13)  | 15.6 (3)        |
| C1_1 | 2984 (2)     | 2464 (2)     | 5446.1 (19)  | 14.8 (5)        |
| C2_1 | 3936 (2)     | 2626 (2)     | 4180 (2)     | 17.3 (5)        |

|      |             |             |             |          |
|------|-------------|-------------|-------------|----------|
| F1_1 | 5098.4 (12) | 2670.8 (13) | 4149.0 (11) | 23.0 (3) |
| F2_1 | 3751.8 (13) | 3591.1 (12) | 3588.4 (12) | 23.4 (3) |
| F3_1 | 3870.1 (13) | 1726.3 (13) | 3649.1 (11) | 23.0 (3) |
| C3_1 | 1715 (2)    | 2001 (2)    | 5513 (2)    | 20.8 (5) |
| F4_1 | 809.9 (13)  | 2123.5 (13) | 6529.7 (12) | 26.2 (3) |
| F5_1 | 1788.4 (15) | 878.5 (13)  | 5385.7 (13) | 28.9 (3) |
| F6_1 | 1364.6 (14) | 2560.9 (14) | 4710.7 (13) | 30.3 (4) |
| C4_1 | 2786 (2)    | 3658 (2)    | 5922 (2)    | 20.1 (5) |
| F7_1 | 2248.2 (14) | 3508.8 (13) | 7069.4 (12) | 26.2 (3) |
| F8_1 | 2052.8 (14) | 4355.0 (13) | 5548.9 (13) | 30.0 (4) |
| F9_1 | 3870.1 (14) | 4205.1 (12) | 5640.9 (13) | 26.2 (3) |

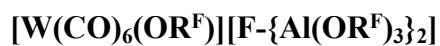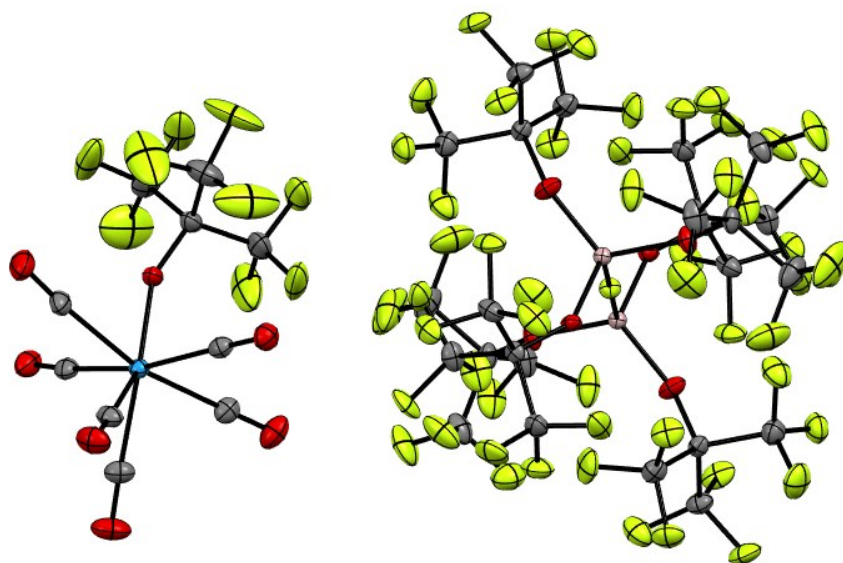

**Table 1 Crystal data and structure refinement for IK\_JB130\_0m\_a.**

|                                                |                                                                    |
|------------------------------------------------|--------------------------------------------------------------------|
| CCDC Deposition Number                         | 1952384                                                            |
| Identification code                            | IK_JB130_0m_a                                                      |
| Empirical formula                              | $\text{C}_{68}\text{Al}_4\text{F}_{128}\text{O}_{26}\text{W}_2$    |
| Formula weight                                 | 4140.30                                                            |
| Temperature/K                                  | 99.99                                                              |
| Crystal system                                 | triclinic                                                          |
| Space group                                    | P-1                                                                |
| a/Å                                            | 15.848(3)                                                          |
| b/Å                                            | 17.229(3)                                                          |
| c/Å                                            | 22.395(4)                                                          |
| $\alpha/^\circ$                                | 94.072(3)                                                          |
| $\beta/^\circ$                                 | 102.240(3)                                                         |
| $\gamma/^\circ$                                | 101.653(3)                                                         |
| Volume/Å <sup>3</sup>                          | 5811.1(17)                                                         |
| Z                                              | 2                                                                  |
| $\rho_{\text{calc}}/\text{cm}^3$               | 2.366                                                              |
| $\mu/\text{mm}^{-1}$                           | 2.283                                                              |
| F(000)                                         | 3936.0                                                             |
| Crystal size/mm <sup>3</sup>                   | 0.1 × 0.08 × 0.08                                                  |
| Radiation                                      | MoK $\alpha$ ( $\lambda = 0.71073$ )                               |
| 2 $\theta$ range for data collection/ $^\circ$ | 1.874 to 62.084                                                    |
| Index ranges                                   | $-22 \leq h \leq 22$ , $-24 \leq k \leq 24$ , $-32 \leq l \leq 32$ |
| Reflections collected                          | 382640                                                             |
| Independent reflections                        | 37090 [ $R_{\text{int}} = 0.0638$ , $R_{\text{sigma}} = 0.0311$ ]  |
| Data/restraints/parameters                     | 37090/39550/3206                                                   |
| Goodness-of-fit on F <sup>2</sup>              | 1.018                                                              |
| Final R indexes [ $I \geq 2\sigma(I)$ ]        | $R_1 = 0.0303$ , $wR_2 = 0.0611$                                   |
| Final R indexes [all data]                     | $R_1 = 0.0519$ , $wR_2 = 0.0698$                                   |
| Largest diff. peak/hole / e Å <sup>-3</sup>    | 1.23/-1.18                                                         |

**Table 2 Fractional Atomic Coordinates ( $\times 10^4$ ) and Equivalent Isotropic Displacement Parameters ( $\text{\AA}^2 \times 10^3$ ) for IK\_JB130\_0m\_a.  $U_{eq}$  is defined as 1/3 of the trace of the orthogonalised  $U_{ij}$  tensor.**

| Atom | x            | y            | z           | U(eq)      |
|------|--------------|--------------|-------------|------------|
| W1   | 4072.7 (2)   | -1375.2 (2)  | 2682.4 (2)  | 16.20 (2)  |
| O1   | 2675.0 (15)  | -251.6 (14)  | 2272.4 (10) | 38.1 (5)   |
| C1   | 3123.2 (18)  | -665.3 (17)  | 2408.8 (12) | 25.1 (5)   |
| F1   | 5000         | 5000         | 0           | 20.2 (4)   |
| Al1  | 4609.8 (5)   | 5858.4 (4)   | 175.4 (3)   | 14.87 (14) |
| O2   | 3717.8 (15)  | -1692.7 (12) | 1174.0 (9)  | 32.1 (5)   |
| C2   | 3812.3 (18)  | -1615.0 (16) | 1718.3 (12) | 23.0 (5)   |
| F2   | 5000         | 5000         | 5000        | 14.8 (4)   |
| Al2  | 5486.3 (5)   | 4513.8 (4)   | 4486.1 (3)  | 12.25 (13) |
| W2   | -1002.5 (2)  | 3609.4 (2)   | 2614.8 (2)  | 15.57 (2)  |
| Al4  | 390.4 (5)    | 9140.8 (4)   | -172.7 (3)  | 12.45 (13) |
| O4   | 4852.4 (13)  | -663.8 (12)  | 4122.5 (8)  | 27.9 (4)   |
| C4   | 4562.5 (17)  | -904.9 (16)  | 3621.5 (11) | 21.2 (5)   |
| F4   | 0            | 10000        | 0           | 16.8 (4)   |
| Al3  | 9453.4 (4)   | 498.8 (4)    | 5464.7 (3)  | 12.05 (13) |
| O3   | 5851.5 (15)  | -2045.4 (14) | 3109.4 (9)  | 35.0 (5)   |
| C3   | 5241.1 (19)  | -1819.2 (17) | 2948.7 (12) | 24.0 (5)   |
| F3   | 10000        | 0            | 5000        | 15.8 (4)   |
| C6   | 3052.2 (18)  | -1802.1 (16) | 3091.9 (13) | 24.4 (5)   |
| O6   | 2488.4 (14)  | -2007.1 (13) | 3316.4 (11) | 35.3 (5)   |
| C5   | 3687.8 (19)  | -2602.9 (16) | 2531.3 (13) | 25.7 (5)   |
| O5   | 3515.9 (17)  | -3276.8 (13) | 2446.1 (11) | 40.2 (5)   |
| C12  | -1504.2 (19) | 2399.5 (16)  | 2357.5 (11) | 23.7 (5)   |
| O12  | -1753.3 (16) | 1739.8 (12)  | 2210.6 (9)  | 34.9 (5)   |
| C11  | -2133.5 (19) | 3199.6 (16)  | 2912.6 (13) | 25.4 (5)   |
| O11  | -2758.2 (15) | 2992.3 (13)  | 3074.4 (11) | 39.5 (5)   |
| C10  | -1830.1 (18) | 4419.0 (17)  | 2337.2 (12) | 23.4 (5)   |
| O10  | -2230.2 (14) | 4870.8 (14)  | 2214.3 (11) | 36.7 (5)   |
| C9   | -601.2 (19)  | 4014.6 (16)  | 3580.9 (12) | 23.9 (5)   |
| O9   | -335.7 (17)  | 4258.5 (13)  | 4075.8 (9)  | 38.3 (5)   |
| C8   | 84.8 (19)    | 3064.2 (16)  | 2928.4 (11) | 22.8 (5)   |
| O8   | 672.5 (15)   | 2815.4 (14)  | 3114.9 (9)  | 33.9 (5)   |
| C7   | -1167.1 (17) | 3442.2 (15)  | 1643.5 (12) | 20.4 (5)   |
| O7   | -1261.3 (14) | 3353.2 (12)  | 1131.9 (8)  | 29.2 (4)   |
| O1_1 | 4761.0 (15)  | -392.7 (13)  | 2422.8 (10) | 19.7 (5)   |
| C1_1 | 5455 (3)     | 242 (3)      | 2498 (2)    | 21.3 (5)   |
| C2_1 | 5335 (4)     | 921 (3)      | 2937 (3)    | 40.7 (8)   |
| F1_1 | 5418 (5)     | 732 (4)      | 3500 (2)    | 94 (2)     |
| F2_1 | 5909 (4)     | 1589 (3)     | 2981 (4)    | 89 (2)     |
| F3_1 | 4537 (4)     | 1061 (3)     | 2767 (3)    | 113 (3)    |
| C3_1 | 5424 (3)     | 518 (3)      | 1846 (2)    | 33.3 (10)  |
| F4_1 | 5405 (4)     | -79 (3)      | 1451 (2)    | 88.0 (19)  |
| F5_1 | 4699 (2)     | 770 (2)      | 1645.5 (17) | 71.6 (12)  |
| F6_1 | 6100 (2)     | 1116 (2)     | 1850.6 (16) | 58.4 (10)  |
| C4_1 | 6346 (3)     | 5 (3)        | 2736 (2)    | 35.6 (10)  |
| F7_1 | 6436 (2)     | -576 (2)     | 2358.2 (18) | 69.2 (12)  |
| F8_1 | 7033.4 (19)  | 610 (2)      | 2816.7 (16) | 54.7 (9)   |
| F9_1 | 6365 (2)     | -268 (2)     | 3271.4 (15) | 60.1 (10)  |
| O1_2 | 41.5 (15)    | 4528.2 (13)  | 2681.8 (10) | 20.0 (5)   |
| C1_2 | 481 (3)      | 5187 (3)     | 2488.0 (19) | 22.6 (6)   |
| C2_2 | 1468 (3)     | 5114 (3)     | 2611 (2)    | 45.7 (11)  |
| F1_2 | 1514 (4)     | 4377 (3)     | 2399 (2)    | 68.0 (13)  |

|      |             |             |             |            |
|------|-------------|-------------|-------------|------------|
| F2_2 | 1964.9 (19) | 5635 (3)    | 2375 (2)    | 107.9 (17) |
| F3_2 | 1784.9 (19) | 5188.6 (18) | 3212.1 (13) | 52.9 (8)   |
| C3_2 | 182 (3)     | 5236 (2)    | 1800.6 (17) | 34.9 (9)   |
| F4_2 | -712.1 (15) | 5158.5 (15) | 1635.6 (10) | 40.4 (6)   |
| F5_2 | 324 (2)     | 4634.6 (17) | 1458.0 (11) | 46.5 (7)   |
| F6_2 | 536 (2)     | 5914.9 (16) | 1620.6 (13) | 53.8 (8)   |
| C4_2 | 376 (4)     | 5931 (3)    | 2863 (3)    | 47.8 (14)  |
| F7_2 | -416 (4)    | 6060 (4)    | 2680 (3)    | 112 (3)    |
| F8_2 | 987 (3)     | 6570.4 (18) | 2819 (2)    | 92.1 (15)  |
| F9_2 | 535 (3)     | 5855 (2)    | 3453.6 (14) | 60.4 (9)   |
| O1_3 | 6420 (4)    | 5241 (4)    | 4519 (4)    | 18.0 (5)   |
| C1_3 | 7110 (4)    | 5454 (4)    | 4248 (3)    | 21.6 (6)   |
| C2_3 | 7161 (3)    | 4772 (2)    | 3775.6 (19) | 27.6 (9)   |
| F1_3 | 6579 (5)    | 4727 (4)    | 3245 (3)    | 38.3 (15)  |
| F2_3 | 7962 (3)    | 4853 (4)    | 3642.0 (19) | 39.3 (10)  |
| F3_3 | 6971 (5)    | 4083 (3)    | 3995 (4)    | 41.6 (16)  |
| C3_3 | 7976 (3)    | 5650 (4)    | 4758 (2)    | 48.8 (14)  |
| F4_3 | 7877 (6)    | 6078 (5)    | 5243 (3)    | 81 (3)     |
| F5_3 | 8196 (5)    | 4992 (5)    | 4943 (3)    | 70 (2)     |
| F6_3 | 8676 (4)    | 6055 (5)    | 4579 (4)    | 64 (2)     |
| C4_3 | 7021 (4)    | 6198 (3)    | 3908 (2)    | 41.0 (12)  |
| F7_3 | 7200 (6)    | 6846 (4)    | 4303 (3)    | 77 (2)     |
| F8_3 | 7571 (4)    | 6309 (3)    | 3529 (3)    | 53.2 (14)  |
| F9_3 | 6208 (7)    | 6113 (7)    | 3586 (6)    | 57 (2)     |
| O1_4 | 5607.6 (11) | 3631.7 (10) | 4751.3 (7)  | 17.8 (3)   |
| C1_4 | 5848.9 (16) | 3207.5 (14) | 5221.1 (11) | 18.0 (5)   |
| C2_4 | 6756.6 (19) | 3639.0 (16) | 5639.9 (13) | 28.9 (6)   |
| F1_4 | 7417.2 (11) | 3548.8 (11) | 5384.5 (10) | 42.5 (5)   |
| F2_4 | 6899.7 (14) | 3371.1 (11) | 6191.1 (8)  | 46.2 (5)   |
| F3_4 | 6792.7 (12) | 4417.4 (9)  | 5731.6 (8)  | 32.7 (4)   |
| C3_4 | 5144.1 (19) | 3112.4 (16) | 5610.8 (12) | 26.1 (6)   |
| F4_4 | 4332.9 (11) | 2927.3 (11) | 5261.4 (8)  | 32.8 (4)   |
| F5_4 | 5232.9 (14) | 3784.5 (11) | 5970.5 (8)  | 38.0 (4)   |
| F6_4 | 5217.4 (13) | 2529.4 (11) | 5981.1 (8)  | 38.2 (4)   |
| C4_4 | 5909.5 (18) | 2372.2 (15) | 4939.9 (12) | 23.7 (5)   |
| F7_4 | 5103.3 (11) | 1911.5 (10) | 4716.4 (8)  | 32.2 (4)   |
| F8_4 | 6343.4 (11) | 1994.7 (10) | 5366.0 (8)  | 32.0 (4)   |
| F9_4 | 6324.0 (12) | 2439.2 (10) | 4487.7 (8)  | 32.6 (4)   |
| O1_5 | 4786.1 (11) | 4368.3 (10) | 3776.1 (7)  | 18.5 (3)   |
| C1_5 | 4147.0 (16) | 3849.3 (14) | 3345.6 (10) | 16.7 (4)   |
| C2_5 | 3316.0 (16) | 3558.9 (16) | 3602.7 (11) | 20.9 (5)   |
| F1_5 | 2836.6 (11) | 4112.9 (11) | 3599.0 (8)  | 31.9 (4)   |
| F2_5 | 2784.1 (11) | 2895.3 (10) | 3283.5 (7)  | 30.9 (4)   |
| F3_5 | 3559.7 (11) | 3420.0 (10) | 4184.4 (7)  | 27.3 (3)   |
| C3_5 | 4489.9 (18) | 3108.4 (15) | 3149.7 (11) | 22.8 (5)   |
| F4_5 | 5320.3 (12) | 3329.7 (11) | 3091.1 (9)  | 37.1 (4)   |
| F5_5 | 4489.6 (12) | 2601.6 (9)  | 3574.1 (7)  | 28.0 (3)   |
| F6_5 | 4002.7 (13) | 2710.0 (10) | 2616.5 (7)  | 34.4 (4)   |
| C4_5 | 3907.0 (18) | 4301.1 (15) | 2780.2 (11) | 21.6 (5)   |
| F7_5 | 4560.1 (12) | 4417.1 (10) | 2488.7 (7)  | 31.3 (4)   |
| F8_5 | 3174.5 (11) | 3903.6 (10) | 2379.8 (7)  | 31.9 (4)   |
| F9_5 | 3781.1 (12) | 5015.4 (10) | 2954.8 (7)  | 28.9 (4)   |
| O1_6 | 4548 (3)    | 6305 (2)    | -482.6 (18) | 29.4 (9)   |
| C1_6 | 4743 (4)    | 6983 (4)    | -743 (3)    | 20.7 (7)   |

|      |           |           |              |           |
|------|-----------|-----------|--------------|-----------|
| C2_6 | 4013 (4)  | 6908 (3)  | -1352 (2)    | 40.3 (13) |
| F1_6 | 3270 (3)  | 7020 (4)  | -1209 (3)    | 78.3 (17) |
| F2_6 | 4221 (3)  | 7412 (2)  | -1738.5 (16) | 63.9 (14) |
| F3_6 | 3859 (4)  | 6185 (3)  | -1658.0 (17) | 64.9 (13) |
| C3_6 | 5649 (4)  | 7060 (4)  | -921 (3)     | 40.0 (15) |
| F4_6 | 6250 (3)  | 6948 (3)  | -446.4 (18)  | 66.5 (13) |
| F5_6 | 5600 (6)  | 6508 (4)  | -1379 (3)    | 56.0 (19) |
| F6_6 | 5939 (3)  | 7774 (3)  | -1087 (2)    | 60.0 (13) |
| C4_6 | 4794 (6)  | 7740 (4)  | -310 (4)     | 27.0 (17) |
| F7_6 | 5569 (5)  | 7963 (4)  | 79 (2)       | 30.5 (11) |
| F8_6 | 4687 (6)  | 8353 (5)  | -627 (4)     | 42.8 (14) |
| F9_6 | 4173 (6)  | 7625 (6)  | 7 (5)        | 56 (2)    |
| O1_7 | 5345 (4)  | 6442 (3)  | 777 (2)      | 14.4 (9)  |
| C1_7 | 5963 (6)  | 6491 (5)  | 1309 (4)     | 17.6 (15) |
| C2_7 | 6798 (5)  | 6242 (6)  | 1181 (4)     | 20.6 (15) |
| F1_7 | 6632 (9)  | 5447 (5)  | 1073 (5)     | 25.2 (14) |
| F2_7 | 7495 (4)  | 6476 (4)  | 1654 (3)     | 30.6 (12) |
| F3_7 | 6997 (5)  | 6554 (5)  | 692 (3)      | 33.4 (12) |
| C3_7 | 6223 (7)  | 7374 (5)  | 1612 (4)     | 31.5 (19) |
| F4_7 | 5480 (8)  | 7648 (12) | 1596 (8)     | 46 (2)    |
| F5_7 | 6702 (4)  | 7835 (5)  | 1307 (4)     | 42.1 (14) |
| F6_7 | 6652 (10) | 7452 (9)  | 2199 (4)     | 47 (3)    |
| C4_7 | 5577 (5)  | 5945 (4)  | 1753 (3)     | 28.8 (14) |
| F7_7 | 5034 (4)  | 6271 (5)  | 2027 (3)     | 42.0 (13) |
| F8_7 | 6203 (5)  | 5791 (4)  | 2195 (2)     | 44.1 (14) |
| F9_7 | 5107 (4)  | 5252 (2)  | 1444 (3)     | 35.7 (11) |
| O1_8 | 3531 (4)  | 5572 (6)  | 153 (4)      | 20.6 (15) |
| C1_8 | 2825 (8)  | 5440 (7)  | 411 (6)      | 22 (2)    |
| C2_8 | 1982 (6)  | 5070 (8)  | -98 (6)      | 45 (3)    |
| F1_8 | 1964 (12) | 4307 (8)  | -238 (8)     | 49 (4)    |
| F2_8 | 1261 (5)  | 5124 (8)  | 90 (6)       | 74 (3)    |
| F3_8 | 2008 (8)  | 5426 (7)  | -604 (5)     | 63 (3)    |
| C3_8 | 2703 (9)  | 6244 (6)  | 705 (5)      | 30 (3)    |
| F4_8 | 3480 (9)  | 6675 (10) | 1032 (7)     | 41 (3)    |
| F5_8 | 2420 (9)  | 6677 (11) | 270 (8)      | 43 (3)    |
| F6_8 | 2138 (12) | 6133 (16) | 1068 (9)     | 39 (4)    |
| C4_8 | 2963 (8)  | 4875 (6)  | 912 (4)      | 38 (2)    |
| F7_8 | 3500 (7)  | 5272 (6)  | 1434 (3)     | 49.7 (19) |
| F8_8 | 2220 (8)  | 4541 (4)  | 1060 (4)     | 63 (2)    |
| F9_8 | 3317 (10) | 4300 (5)  | 728 (3)      | 63 (3)    |
| O1_9 | 8623 (5)  | -214 (6)  | 5616 (5)     | 15.2 (12) |
| C1_9 | 7746 (5)  | -566 (5)  | 5468 (4)     | 15.5 (12) |
| C2_9 | 7179 (5)  | -19 (4)   | 5692 (3)     | 24.0 (12) |
| F1_9 | 7270 (4)  | 36 (5)    | 6306 (2)     | 37.3 (11) |
| F2_9 | 6303 (5)  | -277 (6)  | 5451 (5)     | 30 (2)    |
| F3_9 | 7425 (6)  | 721 (3)   | 5556 (3)     | 32.3 (12) |
| C3_9 | 7391 (5)  | -789 (5)  | 4759 (3)     | 23.9 (14) |
| F4_9 | 8010 (5)  | -1035 (6) | 4523 (5)     | 39.5 (13) |
| F5_9 | 7221 (5)  | -157 (4)  | 4489 (3)     | 35.0 (14) |
| F6_9 | 6648 (6)  | -1358 (8) | 4607 (7)     | 32 (2)    |
| C4_9 | 7636 (5)  | -1336 (4) | 5791 (3)     | 23.7 (12) |
| F7_9 | 7884 (6)  | -1908 (5) | 5488 (3)     | 33.5 (13) |
| F8_9 | 6802 (6)  | -1619 (7) | 5800 (6)     | 37 (2)    |
| F9_9 | 8139 (5)  | -1199 (4) | 6361 (2)     | 34.0 (13) |

|       |              |              |             |           |
|-------|--------------|--------------|-------------|-----------|
| O1_10 | 9073 (4)     | 1186 (3)     | 5045 (3)    | 23.0 (4)  |
| C1_10 | 9111 (3)     | 1767 (3)     | 4676 (2)    | 16.3 (9)  |
| C2_10 | 8881 (2)     | 2511 (2)     | 4988.8 (16) | 22.9 (7)  |
| F1_10 | 9567 (3)     | 2929 (3)     | 5408.5 (19) | 35.7 (9)  |
| F2_10 | 8621.1 (19)  | 2995.2 (16)  | 4575.2 (15) | 33.4 (6)  |
| F3_10 | 8221 (4)     | 2272 (4)     | 5260.8 (17) | 31.0 (10) |
| C3_10 | 8424 (2)     | 1463 (2)     | 4057.8 (15) | 25.9 (8)  |
| F4_10 | 8451 (4)     | 721 (3)      | 3867 (5)    | 37.8 (13) |
| F5_10 | 7608 (4)     | 1450 (3)     | 4116 (3)    | 31.6 (12) |
| F6_10 | 8577 (2)     | 1912 (2)     | 3609.6 (12) | 40.0 (7)  |
| C4_10 | 10052 (2)    | 2000 (2)     | 4551.3 (15) | 22.4 (7)  |
| F7_10 | 10167 (3)    | 1453 (2)     | 4148 (2)    | 32.3 (8)  |
| F8_10 | 10184 (7)    | 2691 (3)     | 4319 (3)    | 31.1 (12) |
| F9_10 | 10668 (4)    | 2057 (5)     | 5070 (3)    | 36.0 (18) |
| O1_11 | 10299.7 (11) | 825.9 (11)   | 6100.3 (7)  | 20.6 (4)  |
| C1_11 | 10505.9 (17) | 1202.8 (16)  | 6683.3 (10) | 21.3 (5)  |
| C2_11 | 10997 (2)    | 689 (2)      | 7119.1 (13) | 36.1 (7)  |
| F1_11 | 11809.8 (13) | 732.7 (14)   | 7030.2 (9)  | 48.1 (5)  |
| F2_11 | 11065.0 (17) | 927.0 (15)   | 7706.3 (8)  | 60.8 (7)  |
| F3_11 | 10572.7 (16) | -70.5 (12)   | 7004.1 (9)  | 52.3 (6)  |
| C3_11 | 9660.5 (19)  | 1313.6 (19)  | 6892.8 (12) | 30.6 (6)  |
| F4_11 | 9098.6 (11)  | 1514.7 (13)  | 6425.6 (8)  | 39.2 (4)  |
| F5_11 | 9230.4 (14)  | 636.1 (13)   | 7050.1 (9)  | 47.6 (5)  |
| F6_11 | 9826.1 (12)  | 1879.7 (12)  | 7363.0 (8)  | 39.4 (4)  |
| C4_11 | 11114.5 (19) | 2032.2 (18)  | 6708.2 (13) | 30.1 (6)  |
| F7_11 | 10646.0 (14) | 2525.9 (11)  | 6439.1 (8)  | 39.8 (4)  |
| F8_11 | 11504.2 (13) | 2360.9 (13)  | 7283.0 (8)  | 47.0 (5)  |
| F9_11 | 11746.7 (12) | 1980.2 (12)  | 6409.8 (9)  | 42.7 (5)  |
| O1_12 | 98.1 (15)    | 8578.5 (11)  | 378.6 (9)   | 29.8 (4)  |
| C1_12 | 168.2 (17)   | 7933.6 (14)  | 681.3 (10)  | 17.9 (5)  |
| C2_12 | 260.8 (19)   | 7225.9 (15)  | 252.7 (12)  | 23.9 (5)  |
| F1_12 | -503.3 (14)  | 6882.1 (12)  | -131.7 (8)  | 45.2 (5)  |
| F2_12 | 552.0 (14)   | 6668.3 (11)  | 558.9 (8)   | 38.8 (4)  |
| F3_12 | 818.6 (14)   | 7487.8 (12)  | -92.4 (9)   | 45.5 (5)  |
| C3_12 | 974.6 (18)   | 8154.7 (18)  | 1237.3 (13) | 29.1 (6)  |
| F4_12 | 1003.0 (14)  | 8846.4 (12)  | 1548.0 (10) | 51.4 (6)  |
| F5_12 | 1725.0 (12)  | 8222.4 (14)  | 1046.9 (10) | 50.8 (6)  |
| F6_12 | 979.3 (13)   | 7621.7 (12)  | 1639.8 (8)  | 39.8 (4)  |
| C4_12 | -695.4 (18)  | 7684.5 (17)  | 915.5 (12)  | 26.1 (6)  |
| F7_12 | -717.5 (13)  | 8219.3 (12)  | 1364.5 (8)  | 41.0 (5)  |
| F8_12 | -752.2 (13)  | 6981.7 (11)  | 1131.7 (9)  | 39.6 (4)  |
| F9_12 | -1407.1 (12) | 7633.5 (13)  | 469.9 (9)   | 41.0 (5)  |
| O1_13 | 1498.9 (11)  | 9471.6 (12)  | -76.3 (9)   | 24.9 (4)  |
| C1_13 | 2242.0 (16)  | 9594.2 (14)  | -296.8 (11) | 18.8 (5)  |
| C2_13 | 2380.5 (17)  | 8785.0 (15)  | -560.6 (12) | 21.7 (5)  |
| F1_13 | 2643.6 (13)  | 8360.2 (10)  | -111.8 (8)  | 35.2 (4)  |
| F2_13 | 2975.0 (11)  | 8871.8 (11)  | -903.4 (8)  | 33.4 (4)  |
| F3_13 | 1622.9 (11)  | 8351.2 (9)   | -914.4 (7)  | 27.3 (3)  |
| C3_13 | 2186 (2)     | 10156.1 (17) | -798.6 (14) | 34.6 (7)  |
| F4_13 | 1812.5 (18)  | 10743.0 (12) | -645.2 (10) | 57.9 (6)  |
| F5_13 | 1684.4 (14)  | 9765.9 (12)  | -1334.7 (8) | 42.5 (5)  |
| F6_13 | 2974.3 (16)  | 10479.3 (12) | -892.4 (10) | 54.5 (6)  |
| C4_13 | 3040.4 (17)  | 9972.7 (17)  | 258.8 (13)  | 26.7 (6)  |
| F7_13 | 3074.4 (12)  | 10737.5 (10) | 395.6 (9)   | 37.6 (4)  |

|       |              |             |              |           |
|-------|--------------|-------------|--------------|-----------|
| F8_13 | 3808.8 (11)  | 9904.4 (13) | 134.8 (10)   | 46.3 (5)  |
| F9_13 | 2962.0 (12)  | 9617.0 (12) | 757.5 (8)    | 37.9 (4)  |
| O1_14 | -126.2 (13)  | 8755.8 (13) | -909.0 (8)   | 30.4 (5)  |
| C1_14 | -850.4 (16)  | 8560.8 (15) | -1382.0 (10) | 18.8 (5)  |
| C2_14 | -1668.1 (18) | 8777.5 (17) | -1195.4 (12) | 26.0 (6)  |
| F1_14 | -1602.1 (12) | 9564.6 (11) | -1163.8 (8)  | 35.2 (4)  |
| F2_14 | -2422.1 (11) | 8423.5 (12) | -1585.9 (9)  | 40.8 (5)  |
| F3_14 | -1695.9 (13) | 8575.8 (12) | -639.1 (8)   | 39.7 (5)  |
| C3_14 | -1054.8 (18) | 7652.9 (16) | -1589.7 (11) | 24.4 (5)  |
| F4_14 | -305.1 (12)  | 7405.4 (11) | -1600.7 (8)  | 34.1 (4)  |
| F5_14 | -1440.1 (14) | 7238.4 (11) | -1208.3 (9)  | 42.7 (5)  |
| F6_14 | -1574.4 (12) | 7454.9 (11) | -2152.1 (8)  | 35.4 (4)  |
| C4_14 | -640 (2)     | 9023.5 (18) | -1924.0 (13) | 32.4 (6)  |
| F7_14 | -85.5 (14)   | 8706.9 (12) | -2189.4 (9)  | 43.5 (5)  |
| F8_14 | -1355.5 (15) | 9016.5 (14) | -2352.1 (9)  | 51.4 (6)  |
| F9_14 | -243.7 (15)  | 9776.7 (11) | -1721.5 (11) | 51.8 (6)  |
| O1_15 | 8593 (17)    | -190 (20)   | 5587 (19)    | 15.2 (12) |
| C1_15 | 7725 (16)    | -551 (16)   | 5528 (13)    | 15.5 (12) |
| C2_15 | 7690 (20)    | -1280 (17)  | 5890 (14)    | 21 (3)    |
| F1_15 | 7940 (40)    | -1860 (30)  | 5610 (20)    | 33.5 (13) |
| F2_15 | 6860 (20)    | -1550 (30)  | 5930 (20)    | 37 (2)    |
| F3_15 | 8190 (30)    | -1100 (20)  | 6454 (15)    | 34.0 (13) |
| C3_15 | 7250 (20)    | 35 (19)     | 5799 (14)    | 29 (4)    |
| F4_15 | 7410 (50)    | 790 (20)    | 5670 (20)    | 44.0 (19) |
| F5_15 | 7460 (30)    | 70 (30)     | 6406 (14)    | 37.3 (11) |
| F6_15 | 6380 (20)    | -250 (40)   | 5624 (18)    | 41 (8)    |
| C4_15 | 7320 (20)    | -790 (20)   | 4835 (12)    | 21 (4)    |
| F7_15 | 7100 (30)    | -160 (30)   | 4587 (19)    | 48 (9)    |
| F8_15 | 6580 (20)    | -1330 (20)  | 4733 (15)    | 32 (8)    |
| F9_15 | 7860 (30)    | -1070 (40)  | 4530 (30)    | 39.5 (13) |
| O1_16 | 9041 (11)    | 1190 (9)    | 5031 (7)     | 23.0 (4)  |
| C1_16 | 9115 (9)     | 1726 (8)    | 4613 (6)     | 20 (2)    |
| C2_16 | 9938 (6)     | 2411 (5)    | 4864 (4)     | 24.1 (19) |
| F1_16 | 9794 (7)     | 2928 (7)    | 5278 (5)     | 30 (2)    |
| F2_16 | 10165 (18)   | 2844 (9)    | 4418 (8)     | 24 (3)    |
| F3_16 | 10618 (10)   | 2104 (12)   | 5095 (7)     | 25 (3)    |
| C3_16 | 9180 (5)     | 1309 (5)    | 4002 (4)     | 21.4 (18) |
| F4_16 | 8613 (9)     | 603 (8)     | 3853 (13)    | 33 (3)    |
| F5_16 | 9974 (6)     | 1180 (6)    | 4016 (5)     | 26 (2)    |
| F6_16 | 8973 (6)     | 1737 (5)    | 3531 (3)     | 33.8 (17) |
| C4_16 | 8256 (6)     | 2046 (5)    | 4528 (4)     | 24.4 (19) |
| F7_16 | 7560 (11)    | 1550 (9)    | 4179 (10)    | 40 (4)    |
| F8_16 | 8346 (5)     | 2714 (4)    | 4258 (4)     | 34.6 (18) |
| F9_16 | 8082 (11)    | 2242 (11)   | 5069 (5)     | 34 (3)    |
| O1_17 | 6444 (8)     | 5199 (9)    | 4513 (7)     | 18.0 (5)  |
| C1_17 | 7161 (9)     | 5437 (7)    | 4273 (6)     | 21.6 (6)  |
| C2_17 | 7760 (6)     | 6197 (6)    | 4667 (4)     | 43 (2)    |
| F1_17 | 7396 (8)     | 6821 (8)    | 4546 (6)     | 56 (3)    |
| F2_17 | 8527 (8)     | 6338 (9)    | 4498 (8)     | 49 (3)    |
| F3_17 | 7896 (13)    | 6154 (8)    | 5255 (5)     | 56 (4)    |
| C3_17 | 7684 (5)     | 4774 (5)    | 4286 (4)     | 31.2 (18) |
| F4_17 | 7160 (11)    | 4040 (8)    | 4133 (8)     | 44 (3)    |
| F5_17 | 8184 (12)    | 4764 (9)    | 4834 (6)     | 55 (3)    |
| F6_17 | 8190 (6)     | 4837 (8)    | 3873 (4)     | 39 (2)    |



|       |           |            |           |           |
|-------|-----------|------------|-----------|-----------|
| C4_17 | 6844 (5)  | 5602 (5)   | 3606 (4)  | 30.8 (18) |
| F7_17 | 6542 (11) | 4923 (7)   | 3234 (7)  | 35 (3)    |
| F8_17 | 7489 (7)  | 6020 (5)   | 3393 (4)  | 39 (2)    |
| F9_17 | 6188 (12) | 5980 (14)  | 3533 (11) | 48 (4)    |
| O1_18 | 5116 (5)  | -465 (4)   | 2695 (4)  | 19.7 (5)  |
| C1_18 | 5496 (10) | 257 (8)    | 2548 (7)  | 21.3 (5)  |
| C2_18 | 5293 (9)  | 917 (7)    | 2958 (8)  | 40.7 (8)  |
| F1_18 | 5689 (9)  | 880 (13)   | 3524 (8)  | 60 (5)    |
| F2_18 | 5535 (11) | 1628 (10)  | 2809 (11) | 58 (5)    |
| F3_18 | 4466 (8)  | 786 (8)    | 2954 (8)  | 49 (4)    |
| C3_18 | 5158 (8)  | 328 (8)    | 1868 (5)  | 43 (3)    |
| F4_18 | 5152 (9)  | -302 (9)   | 1482 (7)  | 55 (4)    |
| F5_18 | 4325 (7)  | 418 (9)    | 1744 (6)  | 73 (4)    |
| F6_18 | 5650 (10) | 938 (8)    | 1672 (6)  | 61 (4)    |
| C4_18 | 6500 (8)  | 304 (8)    | 2688 (5)  | 31 (3)    |
| F7_18 | 6707 (7)  | -100 (7)   | 2236 (5)  | 48 (3)    |
| F8_18 | 6960 (7)  | 1046 (6)   | 2742 (6)  | 60 (3)    |
| F9_18 | 6793 (7)  | 32 (8)     | 3205 (4)  | 48 (3)    |
| O1_20 | 8565 (7)  | -111 (9)   | 5620 (8)  | 16 (3)    |
| C1_20 | 7704 (9)  | -518 (8)   | 5467 (6)  | 19 (2)    |
| C2_20 | 7520 (6)  | -1041 (6)  | 5976 (4)  | 36 (2)    |
| F1_20 | 7474 (4)  | -598 (5)   | 6472 (3)  | 51.2 (19) |
| F2_20 | 6748 (9)  | -1585 (9)  | 5826 (7)  | 36 (4)    |
| F3_20 | 8154 (6)  | -1433 (5)  | 6134 (4)  | 44 (2)    |
| C3_20 | 7514 (7)  | -1050 (6)  | 4848 (4)  | 29 (2)    |
| F4_20 | 7920 (6)  | -658 (4)   | 4455 (4)  | 39.4 (18) |
| F5_20 | 7786 (4)  | -1720 (3)  | 4904 (3)  | 48.3 (18) |
| F6_20 | 6652 (9)  | -1255 (16) | 4570 (15) | 41 (5)    |
| C4_20 | 7111 (5)  | 93 (5)     | 5396 (4)  | 26.8 (18) |
| F7_20 | 7070 (4)  | 403 (4)    | 4879 (3)  | 37.7 (14) |
| F8_20 | 6287 (7)  | -246 (12)  | 5400 (8)  | 44 (5)    |
| F9_20 | 7419 (9)  | 677 (6)    | 5861 (4)  | 44.0 (19) |
| O1_21 | 4920 (7)  | 6447 (6)   | -366 (4)  | 29.4 (9)  |
| C1_21 | 4816 (10) | 7054 (9)   | -714 (7)  | 20.7 (7)  |
| C2_21 | 4767 (13) | 7782 (9)   | -293 (8)  | 22 (4)    |
| F1_21 | 4240 (20) | 7504 (19)  | 75 (15)   | 60 (6)    |
| F2_21 | 4434 (11) | 8320 (12)  | -588 (11) | 42 (4)    |
| F3_21 | 5521 (15) | 8100 (13)  | 110 (8)   | 52 (6)    |
| C3_21 | 5600 (8)  | 7234 (7)   | -1036 (5) | 28 (3)    |
| F4_21 | 5450 (14) | 6680 (8)   | -1504 (6) | 61 (5)    |
| F5_21 | 6344 (6)  | 7272 (6)   | -656 (5)  | 39 (2)    |
| F6_21 | 5600 (7)  | 7926 (6)   | -1263 (5) | 31 (2)    |
| C4_21 | 3913 (8)  | 6810 (8)   | -1180 (6) | 42 (2)    |
| F7_21 | 3734 (11) | 6081 (6)   | -1475 (5) | 64.9 (13) |
| F8_21 | 3825 (9)  | 7298 (6)   | -1601 (5) | 63.9 (14) |
| F9_21 | 3234 (6)  | 6832 (8)   | -922 (6)  | 67 (3)    |
| O1_22 | 3596 (3)  | 5402 (4)   | 294 (3)   | 18.3 (11) |
| C1_22 | 2808 (6)  | 5431 (6)   | 430 (4)   | 19.5 (17) |
| C2_22 | 2064 (5)  | 5197 (6)   | -174 (3)  | 25.0 (15) |
| F1_22 | 1875 (9)  | 4428 (6)   | -369 (6)  | 36.4 (17) |
| F2_22 | 1309 (4)  | 5399 (5)   | -114 (3)  | 41.5 (14) |
| F3_22 | 2320 (4)  | 5573 (4)   | -632 (2)  | 29.2 (12) |
| C3_22 | 2812 (7)  | 6278 (5)   | 717 (3)   | 22.3 (17) |
| F4_22 | 3595 (7)  | 6604 (8)   | 1095 (5)  | 29.0 (17) |

|       |           |           |            |           |
|-------|-----------|-----------|------------|-----------|
| F5_22 | 2673 (6)  | 6771 (8)  | 295 (5)    | 34.1 (16) |
| F6_22 | 2210 (9)  | 6276 (12) | 1059 (6)   | 30.7 (19) |
| C4_22 | 2631 (5)  | 4816 (4)  | 889 (3)    | 30.0 (15) |
| F7_22 | 3128 (5)  | 5117 (4)  | 1451 (2)   | 40.5 (13) |
| F8_22 | 1791 (4)  | 4659 (3)  | 925 (2)    | 41.9 (14) |
| F9_22 | 2816 (5)  | 4143 (2)  | 722 (2)    | 43.3 (13) |
| O1_23 | 5183 (5)  | 6266 (7)  | 910 (4)    | 25.6 (18) |
| C1_23 | 5936 (8)  | 6508 (8)  | 1361 (6)   | 19 (2)    |
| C2_23 | 6737 (7)  | 6334 (9)  | 1125 (6)   | 24 (3)    |
| F1_23 | 6741 (15) | 5558 (8)  | 1072 (10)  | 37 (3)    |
| F2_23 | 7520 (6)  | 6712 (8)  | 1485 (5)   | 39 (2)    |
| F3_23 | 6711 (9)  | 6536 (8)  | 565 (5)    | 36 (2)    |
| C3_23 | 6098 (10) | 7410 (6)  | 1555 (5)   | 22 (2)    |
| F4_23 | 5354 (13) | 7632 (17) | 1616 (11)  | 33 (3)    |
| F5_23 | 6414 (10) | 7833 (7)  | 1155 (6)   | 48 (3)    |
| F6_23 | 6664 (14) | 7625 (13) | 2101 (7)   | 39 (3)    |
| C4_23 | 5827 (9)  | 6030 (6)  | 1909 (5)   | 33 (2)    |
| F7_23 | 5294 (8)  | 6312 (7)  | 2219 (5)   | 42 (2)    |
| F8_23 | 6589 (10) | 6086 (8)  | 2310 (4)   | 50 (3)    |
| F9_23 | 5469 (10) | 5273 (4)  | 1722 (7)   | 56 (3)    |
| O1_24 | 4811 (12) | 6335 (12) | -441 (8)   | 29.4 (9)  |
| C1_24 | 4584 (12) | 6920 (12) | -788 (8)   | 32 (3)    |
| C2_24 | 4936 (11) | 7723 (12) | -371 (8)   | 22 (4)    |
| F1_24 | 4712 (12) | 7685 (11) | 179 (8)    | 25 (4)    |
| F2_24 | 4720 (30) | 8380 (30) | -570 (20)  | 42.8 (14) |
| F3_24 | 5826 (9)  | 7898 (12) | -198 (9)   | 68 (7)    |
| C3_24 | 5004 (13) | 6848 (11) | -1354 (7)  | 60 (6)    |
| F4_24 | 4450 (20) | 6299 (13) | -1765 (10) | 91 (8)    |
| F5_24 | 5767 (17) | 6660 (20) | -1217 (18) | 115 (14)  |
| F6_24 | 5060 (20) | 7544 (13) | -1565 (11) | 88 (9)    |
| C4_24 | 3568 (11) | 6795 (10) | -966 (8)   | 38 (2)    |
| F7_24 | 3107 (15) | 6073 (9)  | -1183 (8)  | 75 (7)    |
| F8_24 | 3341 (13) | 7250 (10) | -1387 (8)  | 34 (5)    |
| F9_24 | 3191 (11) | 7044 (11) | -531 (8)   | 40 (4)    |
| O1_19 | -232 (6)  | 4610 (5)  | 2418 (4)   | 20.0 (5)  |
| C1_19 | 492 (9)   | 5237 (9)  | 2555 (7)   | 22.6 (6)  |
| C2_19 | 304 (10)  | 5904 (7)  | 2967 (6)   | 29 (3)    |
| F1_19 | -322 (9)  | 6184 (11) | 2627 (7)   | 42 (4)    |
| F2_19 | 997 (8)   | 6484 (8)  | 3220 (8)   | 66 (4)    |
| F3_19 | -29 (10)  | 5636 (6)  | 3421 (5)   | 52 (4)    |
| C3_19 | 1304 (6)  | 4957 (7)  | 2906 (5)   | 34 (3)    |
| F4_19 | 1372 (15) | 4297 (9)  | 2600 (8)   | 53 (4)    |
| F5_19 | 1231 (8)  | 4787 (8)  | 3460 (4)   | 55 (3)    |
| F6_19 | 2069 (6)  | 5479 (7)  | 2945 (7)   | 52 (3)    |
| C4_19 | 657 (8)   | 5528 (8)  | 1946 (6)   | 40 (3)    |
| F7_19 | 970 (11)  | 4998 (7)  | 1651 (7)   | 76 (5)    |
| F8_19 | 1230 (7)  | 6203 (6)  | 2029 (6)   | 66 (4)    |
| F9_19 | -92 (8)   | 5617 (9)  | 1603 (5)   | 59 (3)    |

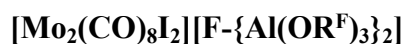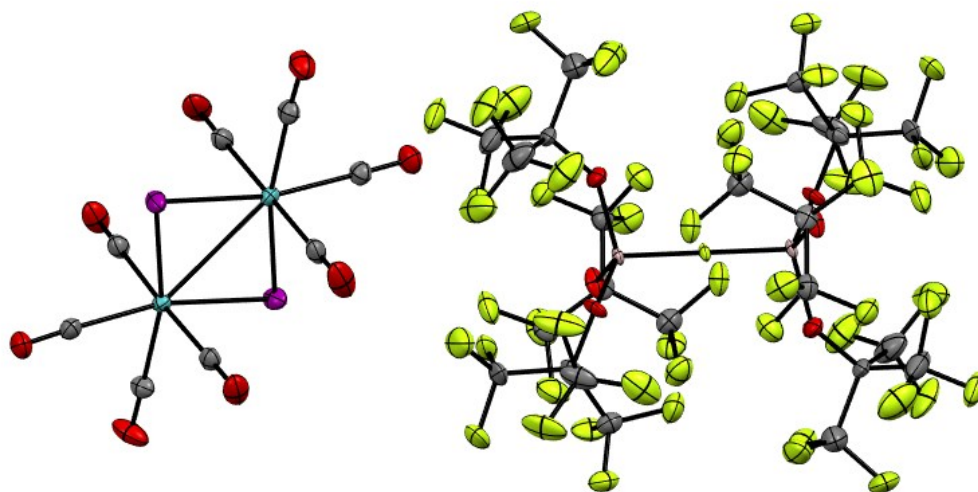

**Table 1 Crystal data and structure refinement for p-1\_a.**

|                                                |                                                                            |
|------------------------------------------------|----------------------------------------------------------------------------|
| CCDC Deposition Number                         | 1952385                                                                    |
| Identification code                            | p-1_a                                                                      |
| Empirical formula                              | $\text{C}_{96}\text{O}_{42}\text{F}_{165}\text{Al}_6\text{Mo}_6\text{I}_6$ |
| Formula weight                                 | 6458.88                                                                    |
| Temperature/K                                  | 100.01                                                                     |
| Crystal system                                 | triclinic                                                                  |
| Space group                                    | P-1                                                                        |
| a/Å                                            | 13.3850(11)                                                                |
| b/Å                                            | 21.4285(17)                                                                |
| c/Å                                            | 31.305(3)                                                                  |
| $\alpha/^\circ$                                | 85.822(3)                                                                  |
| $\beta/^\circ$                                 | 81.782(3)                                                                  |
| $\gamma/^\circ$                                | 83.840(3)                                                                  |
| Volume/Å <sup>3</sup>                          | 8820.3(12)                                                                 |
| Z                                              | 2                                                                          |
| $\rho_{\text{calc}}/\text{cm}^3$               | 2.432                                                                      |
| $\mu/\text{mm}^{-1}$                           | 1.740                                                                      |
| F(000)                                         | 6090.0                                                                     |
| Crystal size/mm <sup>3</sup>                   | 0.1 × 0.08 × 0.02                                                          |
| Radiation                                      | MoK $\alpha$ ( $\lambda = 0.71073$ )                                       |
| 2 $\theta$ range for data collection/ $^\circ$ | 1.316 to 54.968                                                            |
| Index ranges                                   | -17 ≤ h ≤ 17, -27 ≤ k ≤ 27, -40 ≤ l ≤ 40                                   |
| Reflections collected                          | 220441                                                                     |
| Independent reflections                        | 40469 [ $R_{\text{int}} = 0.0683$ , $R_{\text{sigma}} = 0.0589$ ]          |
| Data/restraints/parameters                     | 40469/37017/2893                                                           |
| Goodness-of-fit on F <sup>2</sup>              | 1.102                                                                      |
| Final R indexes [ $I \geq 2\sigma(I)$ ]        | $R_1 = 0.0698$ , $wR_2 = 0.1668$                                           |
| Final R indexes [all data]                     | $R_1 = 0.1007$ , $wR_2 = 0.1822$                                           |
| Largest diff. peak/hole / e Å <sup>-3</sup>    | 5.74/-2.29                                                                 |

With a better (numerical) absorption correction, the quality of the structure would certainly improve greatly.

**Table 2 Fractional Atomic Coordinates ( $\times 10^4$ ) and Equivalent Isotropic Displacement Parameters ( $\text{\AA}^2 \times 10^3$ ) for p-1\_a.  $U_{\text{eq}}$  is defined as 1/3 of of the trace of the orthogonalised  $U_{ij}$  tensor.**

| Atom | x            | y            | z           | U(eq)      |
|------|--------------|--------------|-------------|------------|
| I001 | 9538.7 (5)   | 14164.4 (3)  | 8760.4 (2)  | 24.20 (13) |
| I002 | 4513.9 (5)   | 143.6 (3)    | 10698.7 (2) | 23.95 (13) |
| I003 | 4297.2 (5)   | 7052.5 (3)   | 7328.3 (2)  | 24.05 (13) |
| I004 | 5775.3 (5)   | 6564.8 (3)   | 6014.0 (2)  | 25.75 (13) |
| I005 | 389.9 (5)    | 9057.6 (3)   | 4735.9 (2)  | 24.24 (13) |
| I006 | 10726.5 (5)  | 12453.9 (3)  | 8057.5 (2)  | 25.07 (13) |
| Mo07 | 5583.1 (5)   | 601.6 (3)    | 9959.5 (2)  | 13.28 (13) |
| Mo08 | 509.6 (5)    | 9762.9 (3)   | 5406.8 (2)  | 13.45 (14) |
| Mo09 | 9586.9 (5)   | 13576.7 (3)  | 8015.4 (2)  | 15.81 (14) |
| Mo0A | 10672.6 (5)  | 13033.2 (3)  | 8800.5 (2)  | 15.03 (14) |
| Mo0B | 5587.6 (5)   | 7415.4 (3)   | 6625.1 (2)  | 15.14 (14) |
| Mo0C | 4495.6 (5)   | 6185.8 (3)   | 6716.2 (2)  | 16.40 (14) |
| Al0D | 9385.9 (16)  | 7883.6 (10)  | 8048.3 (7)  | 8.5 (4)    |
| Al0E | 4435.5 (16)  | 4819.7 (10)  | 9552.0 (7)  | 8.2 (4)    |
| Al0F | 555.4 (17)   | 5448.6 (10)  | 5341.2 (7)  | 11.2 (4)   |
| Al0G | 10492.8 (16) | 8959.5 (10)  | 8594.5 (7)  | 9.4 (4)    |
| Al0H | 5658.2 (17)  | 12024.5 (11) | 7047.0 (7)  | 11.9 (4)   |
| Al0I | 4502.8 (17)  | 11530.6 (11) | 6197.3 (7)  | 12.5 (4)   |
| F00J | 5000         | 5000         | 10000       | 10.6 (11)  |
| F00K | 0            | 5000         | 5000        | 12.0 (12)  |
| F00L | 9948 (3)     | 8427 (2)     | 8315.4 (14) | 14.5 (9)   |
| F00M | 5093 (3)     | 11780 (2)    | 6616.8 (14) | 16.6 (9)   |
| O1P  | 9308 (6)     | 13183 (3)    | 7080 (2)    | 35.4 (16)  |
| O04M | 8647 (5)     | 12412 (3)    | 9218 (2)    | 34.5 (16)  |
| O04Q | 6093 (5)     | 1694 (3)     | 10511 (2)   | 28.6 (14)  |
| O04T | 8238 (6)     | 14785 (3)    | 7688 (2)    | 36.9 (16)  |
| O052 | 7497 (5)     | 6646 (3)     | 6998 (3)    | 38.2 (17)  |
| O053 | 1737 (5)     | 8556 (3)     | 5799 (2)    | 34.6 (16)  |
| O054 | 3590 (5)     | 1451 (3)     | 9732 (3)    | 42.3 (19)  |
| O057 | -1602 (5)    | 9311 (3)     | 5890 (2)    | 35.4 (16)  |
| O05D | 11119 (5)    | 13341 (3)    | 9735 (2)    | 29.9 (15)  |
| O05E | 12673 (5)    | 13682 (4)    | 8377 (2)    | 44 (2)     |
| O05G | 3703 (5)     | 8125 (3)     | 6204 (2)    | 38.2 (17)  |
| O05I | 6360 (6)     | 5454 (3)     | 7145 (3)    | 43.0 (19)  |
| O05L | 919 (5)      | 10245 (3)    | 6298 (2)    | 31.0 (15)  |
| O05M | 5814 (5)     | 8616 (3)     | 7143 (2)    | 32.7 (15)  |
| O05O | 7575 (5)     | -232 (3)     | 10209 (3)   | 42.8 (19)  |
| O05S | 6926 (5)     | 1451 (3)     | 9274 (2)    | 35.5 (16)  |
| O05U | 2615 (5)     | 10245 (4)    | 4948 (2)    | 48 (2)     |
| O05W | 4309 (5)     | 5016 (3)     | 6171 (2)    | 34.2 (16)  |
| O05X | 2565 (6)     | 6905 (3)     | 6331 (3)    | 48 (2)     |
| O05Y | 11983 (6)    | 11788 (4)    | 9104 (2)    | 45 (2)     |
| O05Z | 7096 (6)     | 8180 (3)     | 5957 (3)    | 41.7 (19)  |
| O060 | 11572 (6)    | 14251 (4)    | 7605 (2)    | 44 (2)     |
| O061 | 3004 (5)     | 5399 (3)     | 7383 (2)    | 38.1 (17)  |
| O063 | 7589 (5)     | 12918 (4)    | 8413 (2)    | 48 (2)     |
| C066 | -874 (6)     | 9469 (4)     | 5713 (3)    | 19.4 (16)  |
| C068 | 9350 (6)     | 12624 (4)    | 9067 (3)    | 19.0 (16)  |
| C06A | 6447 (7)     | 1131 (4)     | 9506 (3)    | 21.4 (17)  |
| C06F | 10886 (7)    | 14013 (5)    | 7750 (3)    | 27.7 (19)  |
| C06I | 8693 (7)     | 14366 (4)    | 7813 (3)    | 23.4 (17)  |
| C06K | 8285 (7)     | 13149 (5)    | 8279 (3)    | 27.2 (19)  |

|       |           |           |             |           |
|-------|-----------|-----------|-------------|-----------|
| C06M  | 1307 (7)  | 8967 (4)  | 5654 (3)    | 22.3 (17) |
| C06W  | 1868 (7)  | 10068 (5) | 5099 (3)    | 26.2 (19) |
| C06X  | 11526 (7) | 12223 (4) | 8986 (3)    | 23.6 (17) |
| C070  | 3541 (7)  | 5691 (4)  | 7155 (3)    | 24.3 (17) |
| C073  | 6888 (7)  | 43 (4)    | 10118 (3)   | 24.1 (18) |
| C074  | 5713 (7)  | 5716 (4)  | 6992 (3)    | 24.8 (18) |
| C075  | 6572 (7)  | 7901 (4)  | 6186 (3)    | 23.5 (17) |
| C079  | 4284 (7)  | 1152 (4)  | 9810 (3)    | 23.5 (17) |
| C07H  | 3241 (7)  | 6661 (4)  | 6464 (3)    | 26.5 (18) |
| C07J  | 9416 (7)  | 13311 (4) | 7416 (3)    | 25.4 (18) |
| C07M  | 6819 (7)  | 6914 (4)  | 6875 (3)    | 24.8 (18) |
| C07O  | 4355 (7)  | 7876 (4)  | 6354 (3)    | 22.6 (17) |
| C07T  | 758 (6)   | 10094 (4) | 5979 (3)    | 18.5 (15) |
| C07U  | 5902 (6)  | 1305 (4)  | 10325 (3)   | 20.1 (16) |
| C07Z  | 10939 (7) | 13254 (4) | 9402 (3)    | 22.5 (17) |
| C080  | 4393 (7)  | 5431 (4)  | 6357 (3)    | 23.5 (17) |
| C084  | 11971 (7) | 13449 (5) | 8522 (3)    | 28.1 (19) |
| C08E  | 5724 (7)  | 8185 (4)  | 6970 (3)    | 22.8 (17) |
| O1_21 | -79 (4)   | 6186 (2)  | 5347.8 (18) | 20.5 (12) |
| C1_21 | -63 (5)   | 6802 (3)  | 5211 (2)    | 18.8 (14) |
| C2_21 | 704 (6)   | 7113 (3)  | 5436 (3)    | 32.7 (19) |
| F1_21 | 347 (6)   | 7238 (3)  | 5837.1 (19) | 55.9 (19) |
| F2_21 | 944 (5)   | 7666 (2)  | 5230 (2)    | 45.9 (16) |
| F3_21 | 1561 (4)  | 6744 (2)  | 5451 (2)    | 40.9 (14) |
| C3_21 | 259 (6)   | 6873 (4)  | 4716 (2)    | 25.4 (16) |
| F4_21 | -144 (5)  | 6443 (3)  | 4521.1 (18) | 40.1 (14) |
| F5_21 | 1254 (4)  | 6766 (3)  | 4612.5 (18) | 36.0 (13) |
| F6_21 | -32 (4)   | 7442 (2)  | 4549.7 (17) | 33.3 (12) |
| C4_21 | -1139 (6) | 7134 (4)  | 5330 (3)    | 36 (2)    |
| F7_21 | -1750 (4) | 6971 (3)  | 5069 (2)    | 51.4 (17) |
| F8_21 | -1152 (5) | 7753 (2)  | 5298 (2)    | 51.6 (18) |
| F9_21 | -1514 (5) | 6959 (3)  | 5732 (2)    | 58 (2)    |
| O1_20 | 310 (5)   | 5062 (3)  | 5837.8 (17) | 22.7 (12) |
| C1_20 | 328 (5)   | 5072 (3)  | 6266 (2)    | 22.6 (15) |
| C2_20 | -391 (7)  | 5633 (4)  | 6464 (3)    | 47 (2)    |
| F1_20 | 66 (7)    | 6168 (3)  | 6370 (2)    | 73 (2)    |
| F2_20 | -598 (5)  | 5534 (4)  | 6895.7 (17) | 55.9 (19) |
| F3_20 | -1258 (5) | 5684 (4)  | 6308 (2)    | 57.3 (19) |
| C3_20 | -16 (7)   | 4449 (4)  | 6493 (3)    | 42 (2)    |
| F4_20 | 430 (6)   | 3966 (3)  | 6269 (2)    | 49.9 (17) |
| F5_20 | -1037 (5) | 4480 (4)  | 6533 (2)    | 59 (2)    |
| F6_20 | 278 (6)   | 4362 (3)  | 6888.4 (19) | 57 (2)    |
| C4_20 | 1419 (7)  | 5148 (5)  | 6354 (3)    | 45 (2)    |
| F7_20 | 1985 (5)  | 4578 (4)  | 6299 (2)    | 59.1 (19) |
| F8_20 | 1456 (5)  | 5343 (3)  | 6747.4 (18) | 48.4 (17) |
| F9_20 | 1842 (5)  | 5586 (3)  | 6072.3 (19) | 47.9 (17) |
| O1_19 | 5242 (5)  | 11720 (3) | 5727.4 (18) | 28.4 (14) |
| C1_19 | 5305 (5)  | 12041 (3) | 5338 (2)    | 19.8 (15) |
| C2_19 | 4771 (7)  | 11703 (4) | 5023 (2)    | 35.2 (19) |
| F1_19 | 5331 (6)  | 11177 (3) | 4898 (2)    | 65 (2)    |
| F2_19 | 4599 (5)  | 12061 (3) | 4671.7 (18) | 52.1 (18) |
| F3_19 | 3875 (5)  | 11548 (3) | 5224 (2)    | 45.4 (16) |
| C3_19 | 4825 (6)  | 12730 (4) | 5374 (3)    | 32.2 (18) |
| F4_19 | 5040 (5)  | 12953 (3) | 5726 (2)    | 51.1 (17) |

|       |          |           |             |           |
|-------|----------|-----------|-------------|-----------|
| F5_19 | 3823 (4) | 12758 (3) | 5385 (2)    | 48.5 (17) |
| F6_19 | 5184 (4) | 13094 (3) | 5032.1 (19) | 40.0 (14) |
| C4_19 | 6446 (6) | 12044 (4) | 5152 (2)    | 34.7 (19) |
| F7_19 | 6873 (5) | 12452 (3) | 5352 (2)    | 52.3 (17) |
| F8_19 | 6585 (5) | 12206 (3) | 4728.0 (17) | 43.1 (15) |
| F9_19 | 6948 (5) | 11476 (3) | 5206 (2)    | 58 (2)    |
| O1_18 | 3350 (4) | 11941 (3) | 6228.8 (19) | 26.7 (13) |
| C1_18 | 2462 (5) | 12154 (4) | 6461 (2)    | 28.3 (17) |
| C2_18 | 2628 (6) | 12755 (4) | 6681 (3)    | 37 (2)    |
| F1_18 | 3134 (5) | 12598 (3) | 7021 (2)    | 49.6 (17) |
| F2_18 | 1756 (4) | 13075 (3) | 6834 (2)    | 49.9 (17) |
| F3_18 | 3167 (5) | 13135 (3) | 6412 (2)    | 53.6 (17) |
| C3_18 | 1658 (6) | 12318 (4) | 6149 (3)    | 33.7 (19) |
| F4_18 | 1678 (5) | 11853 (3) | 5883 (2)    | 52.5 (18) |
| F5_18 | 1845 (5) | 12844 (3) | 5910 (2)    | 51.1 (16) |
| F6_18 | 725 (4)  | 12422 (3) | 6356 (2)    | 44.8 (16) |
| C4_18 | 2103 (6) | 11645 (4) | 6807 (2)    | 30.7 (18) |
| F7_18 | 1725 (5) | 11191 (3) | 6640 (2)    | 47.5 (16) |
| F8_18 | 1394 (5) | 11880 (3) | 7113 (2)    | 52.6 (18) |
| F9_18 | 2884 (4) | 11386 (3) | 7003.1 (19) | 45.5 (15) |
| O1_17 | 4574 (5) | 10740 (3) | 6305 (2)    | 27.9 (14) |
| C1_17 | 4463 (5) | 10147 (3) | 6223 (2)    | 21.0 (15) |
| C2_17 | 3812 (6) | 10128 (4) | 5845 (2)    | 26.5 (17) |
| F1_17 | 3059 (4) | 10590 (2) | 5872.4 (18) | 31.4 (12) |
| F2_17 | 3414 (4) | 9590 (2)  | 5848.4 (18) | 34.2 (13) |
| F3_17 | 4386 (4) | 10217 (3) | 5465.2 (16) | 36.1 (13) |
| C3_17 | 5507 (6) | 9788 (4)  | 6101 (3)    | 30.7 (18) |
| F4_17 | 5986 (4) | 9642 (3)  | 6446.5 (19) | 41.5 (14) |
| F5_17 | 6105 (4) | 10126 (3) | 5821.4 (19) | 41.4 (14) |
| F6_17 | 5424 (5) | 9244 (3)  | 5924 (2)    | 45.8 (16) |
| C4_17 | 3903 (6) | 9829 (4)  | 6641 (2)    | 29.8 (18) |
| F7_17 | 4244 (5) | 9984 (3)  | 6986.9 (17) | 46.6 (16) |
| F8_17 | 4002 (5) | 9205 (3)  | 6635 (2)    | 46.4 (16) |
| F9_17 | 2911 (4) | 10012 (3) | 6678.4 (19) | 42.5 (15) |
| O1_16 | 5475 (5) | 12824 (3) | 6988 (2)    | 29.0 (14) |
| C1_16 | 5601 (5) | 13414 (3) | 7080 (2)    | 24.8 (16) |
| C2_16 | 6314 (6) | 13414 (4) | 7436 (3)    | 29.8 (18) |
| F1_16 | 5820 (5) | 13286 (3) | 7824.0 (19) | 48.2 (16) |
| F2_16 | 6702 (4) | 13954 (3) | 7442 (2)    | 40.3 (14) |
| F3_16 | 7077 (4) | 12967 (3) | 7371 (2)    | 41.3 (14) |
| C3_16 | 6082 (7) | 13776 (4) | 6663 (3)    | 38 (2)    |
| F4_16 | 5664 (6) | 13661 (3) | 6327 (2)    | 60 (2)    |
| F5_16 | 7072 (5) | 13601 (3) | 6590 (2)    | 56.4 (18) |
| F6_16 | 5966 (6) | 14399 (3) | 6698 (2)    | 55.5 (18) |
| C4_16 | 4567 (6) | 13768 (4) | 7247 (3)    | 33.6 (19) |
| F7_16 | 4013 (5) | 13932 (3) | 6923 (2)    | 44.9 (16) |
| F8_16 | 4666 (5) | 14285 (3) | 7440 (2)    | 54.5 (19) |
| F9_16 | 4024 (5) | 13397 (3) | 7528 (2)    | 53.0 (17) |
| O1_15 | 6867 (4) | 11688 (3) | 6993.9 (19) | 27.0 (14) |
| C1_15 | 7744 (5) | 11510 (3) | 6744 (2)    | 22.0 (15) |
| C2_15 | 7605 (6) | 10902 (4) | 6525 (3)    | 28.4 (17) |
| F1_15 | 7140 (5) | 10496 (3) | 6801 (2)    | 47.4 (16) |
| F2_15 | 8473 (4) | 10605 (3) | 6352.1 (19) | 38.1 (14) |
| F3_15 | 7044 (4) | 11036 (3) | 6199.7 (19) | 38.5 (14) |

|       |           |           |             |           |
|-------|-----------|-----------|-------------|-----------|
| C3_15 | 8008 (6)  | 12030 (4) | 6390 (2)    | 28.5 (17) |
| F4_15 | 8397 (4)  | 12494 (2) | 6541.3 (19) | 37.7 (13) |
| F5_15 | 7146 (5)  | 12292 (3) | 6236.8 (19) | 41.5 (14) |
| F6_15 | 8639 (5)  | 11825 (3) | 6059 (2)    | 51.4 (18) |
| C4_15 | 8606 (6)  | 11373 (4) | 7028 (3)    | 29.8 (18) |
| F7_15 | 8575 (5)  | 11822 (3) | 7296.3 (19) | 42.7 (15) |
| F8_15 | 9522 (4)  | 11344 (4) | 6786 (2)    | 55.2 (18) |
| F9_15 | 8546 (5)  | 10826 (3) | 7248 (2)    | 54.4 (18) |
| O1_14 | 4955 (5)  | 11750 (3) | 7503.3 (19) | 34.4 (16) |
| C1_14 | 4907 (5)  | 11413 (3) | 7885 (2)    | 23.6 (16) |
| C2_14 | 3768 (7)  | 11364 (5) | 8058 (3)    | 57 (3)    |
| F1_14 | 3238 (7)  | 11914 (4) | 8007 (4)    | 119 (4)   |
| F2_14 | 3652 (6)  | 11190 (4) | 8482 (2)    | 77 (3)    |
| F3_14 | 3404 (5)  | 10944 (4) | 7843 (3)    | 76 (2)    |
| C3_14 | 5436 (6)  | 10732 (4) | 7842 (3)    | 37 (2)    |
| F4_14 | 6435 (4)  | 10745 (4) | 7807 (3)    | 76 (3)    |
| F5_14 | 5251 (7)  | 10517 (4) | 7483 (3)    | 77 (2)    |
| F6_14 | 5125 (5)  | 10347 (3) | 8169 (2)    | 54.1 (18) |
| C4_14 | 5416 (8)  | 11747 (5) | 8205 (3)    | 67 (3)    |
| F7_14 | 6294 (7)  | 11931 (4) | 8013 (2)    | 84 (3)    |
| F8_14 | 5593 (8)  | 11374 (4) | 8549 (2)    | 96 (3)    |
| F9_14 | 4792 (10) | 12256 (4) | 8330 (3)    | 135 (5)   |
| O1_12 | 1788 (4)  | 5450 (3)  | 5121 (2)    | 24.2 (13) |
| C1_12 | 2651 (5)  | 5180 (3)  | 4905 (2)    | 22.3 (15) |
| C2_12 | 2993 (6)  | 4551 (4)  | 5144 (2)    | 27.5 (17) |
| F1_12 | 3404 (4)  | 4642 (3)  | 5490.1 (17) | 35.2 (13) |
| F2_12 | 3680 (4)  | 4195 (3)  | 4888.5 (18) | 39.3 (14) |
| F3_12 | 2205 (4)  | 4221 (3)  | 5268.1 (19) | 36.7 (13) |
| C3_12 | 2464 (6)  | 5051 (4)  | 4440 (2)    | 28.4 (17) |
| F4_12 | 1898 (5)  | 5531 (3)  | 4278.0 (18) | 39.1 (14) |
| F5_12 | 1971 (4)  | 4535 (3)  | 4452.1 (18) | 33.7 (12) |
| F6_12 | 3318 (4)  | 4967 (3)  | 4171.8 (17) | 35.4 (13) |
| C4_12 | 3478 (6)  | 5641 (4)  | 4877 (3)    | 29.3 (17) |
| F7_12 | 3264 (4)  | 6132 (3)  | 4607 (2)    | 42.5 (15) |
| F8_12 | 4394 (4)  | 5389 (3)  | 4735 (2)    | 43.9 (15) |
| F9_12 | 3489 (4)  | 5862 (3)  | 5265.1 (18) | 39.1 (14) |
| O1_10 | 8212 (4)  | 7839 (3)  | 8338.8 (17) | 15.4 (11) |
| C1_10 | 7198 (5)  | 7990 (3)  | 8361 (2)    | 14.5 (13) |
| C2_10 | 6966 (5)  | 8708 (3)  | 8252 (2)    | 21.5 (15) |
| F1_10 | 7569 (4)  | 9030 (2)  | 8435.8 (19) | 36.3 (13) |
| F2_10 | 6012 (4)  | 8915 (3)  | 8394.3 (19) | 34.9 (13) |
| F3_10 | 7132 (4)  | 8846 (2)  | 7828.6 (16) | 28.5 (11) |
| C3_10 | 6779 (5)  | 7611 (3)  | 8030 (2)    | 19.3 (15) |
| F4_10 | 6759 (4)  | 7013 (2)  | 8168.1 (17) | 29.3 (12) |
| F5_10 | 7367 (4)  | 7632 (2)  | 7649.5 (15) | 24.5 (11) |
| F6_10 | 5844 (4)  | 7842 (3)  | 7965.1 (17) | 30.1 (12) |
| C4_10 | 6691 (5)  | 7814 (3)  | 8823 (2)    | 20.7 (15) |
| F7_10 | 7104 (4)  | 7262 (2)  | 8967.2 (17) | 30.8 (12) |
| F8_10 | 5696 (4)  | 7775 (3)  | 8837.1 (17) | 36.1 (14) |
| F9_10 | 6805 (4)  | 8245 (3)  | 9099.0 (16) | 32.7 (12) |
| O1_9  | 10185 (4) | 7212 (2)  | 8101.7 (19) | 18.6 (12) |
| C1_9  | 10281 (5) | 6575 (3)  | 8142 (2)    | 14.0 (13) |
| C2_9  | 10025 (6) | 6302 (4)  | 7730 (2)    | 29.4 (18) |
| F1_9  | 9187 (5)  | 6611 (3)  | 7607 (2)    | 45.3 (16) |

|      |           |           |             |           |
|------|-----------|-----------|-------------|-----------|
| F2_9 | 9871 (5)  | 5695 (2)  | 7794 (2)    | 45.8 (16) |
| F3_9 | 10773 (5) | 6362 (3)  | 7399.0 (17) | 45.9 (15) |
| C3_9 | 11402 (5) | 6360 (3)  | 8200 (2)    | 19.5 (15) |
| F4_9 | 11583 (4) | 6497 (2)  | 8587.8 (16) | 28.7 (11) |
| F5_9 | 12036 (4) | 6662 (2)  | 7906.3 (18) | 30.9 (12) |
| F6_9 | 11633 (4) | 5745 (2)  | 8157.8 (17) | 28.2 (11) |
| C4_9 | 9570 (5)  | 6336 (3)  | 8544 (2)    | 20.7 (15) |
| F7_9 | 9570 (4)  | 6689 (3)  | 8873.2 (16) | 35.2 (13) |
| F8_9 | 9851 (4)  | 5739 (2)  | 8668.8 (18) | 33.7 (13) |
| F9_9 | 8629 (4)  | 6365 (2)  | 8452 (2)    | 36.8 (14) |
| O1_8 | 9335 (4)  | 8186 (3)  | 7536.6 (16) | 19.0 (12) |
| C1_8 | 9714 (5)  | 8424 (3)  | 7146 (2)    | 17.1 (14) |
| C2_8 | 10846 (5) | 8529 (4)  | 7140 (2)    | 25.7 (16) |
| F1_8 | 10938 (4) | 9025 (3)  | 7360.3 (18) | 34.0 (13) |
| F2_8 | 11337 (4) | 8614 (3)  | 6742.6 (17) | 40.5 (15) |
| F3_8 | 11333 (4) | 8031 (3)  | 7329.8 (19) | 37.6 (13) |
| C3_8 | 9615 (6)  | 7971 (4)  | 6793 (2)    | 28.9 (17) |
| F4_8 | 8702 (4)  | 7758 (3)  | 6857.3 (18) | 39.1 (14) |
| F5_8 | 10308 (5) | 7483 (3)  | 6801 (2)    | 45.5 (15) |
| F6_8 | 9734 (5)  | 8257 (3)  | 6395.8 (16) | 37.7 (14) |
| C4_8 | 9096 (6)  | 9065 (3)  | 7049 (2)    | 25.5 (16) |
| F7_8 | 8190 (4)  | 8981 (3)  | 6947.8 (18) | 35.6 (13) |
| F8_8 | 9582 (5)  | 9402 (3)  | 6723.1 (19) | 43.2 (15) |
| F9_8 | 8957 (4)  | 9408 (2)  | 7392.4 (19) | 37.0 (13) |
| O1_7 | 9673 (4)  | 9629 (2)  | 8573.4 (19) | 18.8 (11) |
| C1_7 | 9582 (5)  | 10261 (3) | 8508 (2)    | 16.6 (14) |
| C2_7 | 9855 (6)  | 10561 (3) | 8907 (2)    | 28.1 (17) |
| F1_7 | 9120 (5)  | 10519 (3) | 9244.0 (16) | 38.7 (14) |
| F2_7 | 9987 (5)  | 11174 (2) | 8823.9 (18) | 39.4 (15) |
| F3_7 | 10708 (4) | 10271 (3) | 9023.1 (18) | 38.4 (14) |
| C3_7 | 10265 (5) | 10484 (3) | 8095 (2)    | 19.4 (15) |
| F4_7 | 10299 (4) | 10090 (2) | 7784.4 (16) | 30.5 (12) |
| F5_7 | 11212 (4) | 10507 (2) | 8175.7 (18) | 30.9 (12) |
| F6_7 | 9936 (4)  | 11057 (2) | 7939.5 (16) | 28.3 (11) |
| C4_7 | 8454 (5)  | 10466 (3) | 8456 (2)    | 23.7 (16) |
| F7_7 | 8260 (4)  | 10295 (3) | 8079.7 (17) | 33.2 (12) |
| F8_7 | 8230 (4)  | 11090 (2) | 8471.9 (19) | 37.3 (14) |
| F9_7 | 7826 (4)  | 10196 (2) | 8766.0 (17) | 30.4 (12) |
| O1_6 | 11651 (4) | 9044 (3)  | 8302.6 (17) | 16.5 (11) |
| C1_6 | 12670 (5) | 8902 (3)  | 8286 (2)    | 19.0 (14) |
| C2_6 | 12913 (6) | 8189 (3)  | 8395 (2)    | 25.3 (16) |
| F1_6 | 12762 (4) | 8051 (2)  | 8817.8 (16) | 28.0 (11) |
| F2_6 | 13877 (4) | 7988 (3)  | 8251.0 (19) | 37.2 (13) |
| F3_6 | 12321 (4) | 7860 (3)  | 8213.6 (19) | 35.5 (13) |
| C3_6 | 13180 (6) | 9079 (4)  | 7823 (2)    | 29.1 (17) |
| F4_6 | 12746 (4) | 9629 (3)  | 7675.2 (17) | 34.7 (13) |
| F5_6 | 13067 (4) | 8644 (3)  | 7548.0 (17) | 34.2 (13) |
| F6_6 | 14165 (4) | 9130 (3)  | 7808.9 (18) | 38.8 (14) |
| C4_6 | 13080 (5) | 9294 (4)  | 8613 (2)    | 23.4 (16) |
| F7_6 | 13083 (4) | 9891 (3)  | 8472.7 (18) | 36.9 (13) |
| F8_6 | 14021 (4) | 9078 (3)  | 8677.9 (18) | 34.9 (13) |
| F9_6 | 12491 (4) | 9275 (2)  | 8994.8 (15) | 28.0 (11) |
| O1_5 | 10573 (4) | 8635 (3)  | 9098.4 (17) | 19.4 (12) |
| C1_5 | 10212 (5) | 8395 (3)  | 9493 (2)    | 16.5 (14) |



|      |           |          |              |           |
|------|-----------|----------|--------------|-----------|
| C2_5 | 9070 (5)  | 8297 (4) | 9507 (2)     | 24.8 (16) |
| F1_5 | 8575 (4)  | 8802 (3) | 9334 (2)     | 41.4 (15) |
| F2_5 | 8606 (4)  | 8193 (3) | 9907.3 (17)  | 39.2 (14) |
| F3_5 | 8968 (4)  | 7814 (3) | 9279.7 (18)  | 35.1 (13) |
| C3_5 | 10832 (6) | 7753 (3) | 9579 (2)     | 23.8 (16) |
| F4_5 | 11747 (4) | 7834 (3) | 9667.1 (19)  | 34.2 (13) |
| F5_5 | 10944 (4) | 7419 (2) | 9237.1 (19)  | 36.7 (13) |
| F6_5 | 10376 (5) | 7418 (3) | 9912.7 (19)  | 41.0 (15) |
| C4_5 | 10315 (6) | 8857 (4) | 9840 (2)     | 27.0 (17) |
| F7_5 | 11247 (4) | 9042 (3) | 9784.4 (18)  | 39.9 (14) |
| F8_5 | 10153 (5) | 8586 (3) | 10239.7 (16) | 46.6 (16) |
| F9_5 | 9672 (5)  | 9364 (3) | 9820 (2)     | 47.5 (16) |
| O1_4 | 5215 (4)  | 5122 (3) | 9127.7 (16)  | 18.2 (11) |
| C1_4 | 5280 (5)  | 5383 (3) | 8718 (2)     | 14.5 (13) |
| C2_4 | 6412 (5)  | 5509 (3) | 8576 (2)     | 20.5 (15) |
| F1_4 | 6634 (4)  | 5979 (2) | 8788.6 (16)  | 28.0 (11) |
| F2_4 | 6599 (4)  | 5660 (3) | 8152.6 (15)  | 30.8 (12) |
| F3_4 | 7035 (4)  | 5006 (2) | 8666.0 (17)  | 31.6 (12) |
| C3_4 | 4971 (6)  | 4933 (4) | 8408 (2)     | 31.8 (18) |
| F4_4 | 4130 (5)  | 4675 (3) | 8590 (2)     | 44.1 (15) |
| F5_4 | 5692 (5)  | 4463 (3) | 8321 (2)     | 48.6 (16) |
| F6_4 | 4772 (5)  | 5222 (3) | 8031.7 (17)  | 46.4 (16) |
| C4_4 | 4599 (5)  | 6018 (3) | 8700 (2)     | 21.1 (15) |
| F7_4 | 3631 (4)  | 5912 (3) | 8702.4 (18)  | 35.7 (14) |
| F8_4 | 4850 (4)  | 6375 (2) | 8341.7 (16)  | 31.7 (12) |
| F9_4 | 4646 (4)  | 6344 (2) | 9034.5 (17)  | 34.9 (13) |
| O1_3 | 3262 (4)  | 5224 (2) | 9625.2 (17)  | 14.2 (10) |
| C1_3 | 2257 (5)  | 5190 (3) | 9742 (2)     | 14.6 (13) |
| C2_3 | 1724 (5)  | 5866 (3) | 9792 (2)     | 21.3 (15) |
| F1_3 | 1852 (4)  | 6092 (2) | 10166.2 (16) | 26.5 (11) |
| F2_3 | 722 (3)   | 5898 (3) | 9778 (2)     | 33.4 (13) |
| F3_3 | 2111 (4)  | 6257 (2) | 9479.2 (17)  | 26.5 (11) |
| C3_3 | 1802 (5)  | 4881 (3) | 9385 (2)     | 18.9 (15) |
| F4_3 | 2402 (3)  | 4368 (2) | 9256.6 (16)  | 21.7 (10) |
| F5_3 | 1744 (4)  | 5273 (2) | 9037.0 (16)  | 31.2 (12) |
| F6_3 | 883 (4)   | 4706 (2) | 9520.7 (18)  | 29.6 (12) |
| C4_3 | 2054 (5)  | 4800 (3) | 10177 (2)    | 18.8 (15) |
| F7_3 | 2232 (4)  | 4190 (2) | 10122.5 (16) | 25.9 (11) |
| F8_3 | 1107 (4)  | 4904 (2) | 10371.4 (17) | 28.5 (12) |
| F9_3 | 2667 (4)  | 4947 (3) | 10449.5 (16) | 30.1 (12) |
| O1_2 | 4403 (4)  | 4025 (2) | 9575.4 (19)  | 18.6 (12) |
| C1_2 | 4809 (5)  | 3422 (3) | 9615 (2)     | 14.4 (13) |
| C2_2 | 4692 (6)  | 3092 (3) | 9204 (2)     | 27.9 (17) |
| F1_2 | 3768 (4)  | 3221 (3) | 9096.3 (18)  | 36.5 (13) |
| F2_2 | 4858 (5)  | 2466 (2) | 9260.8 (19)  | 37.9 (14) |
| F3_2 | 5357 (5)  | 3273 (3) | 8872.3 (17)  | 41.5 (14) |
| C3_2 | 5948 (5)  | 3395 (3) | 9670 (2)     | 22.0 (15) |
| F4_2 | 6048 (4)  | 3541 (3) | 10067.3 (16) | 28.8 (12) |
| F5_2 | 6403 (4)  | 3809 (3) | 9392.7 (18)  | 36.2 (13) |
| F6_2 | 6437 (4)  | 2824 (2) | 9606 (2)     | 34.9 (13) |
| C4_2 | 4209 (5)  | 3096 (3) | 10016 (2)    | 21.2 (15) |
| F7_2 | 4080 (4)  | 3454 (3) | 10350.7 (16) | 30.4 (12) |
| F8_2 | 4696 (4)  | 2547 (2) | 10136.3 (19) | 37.5 (14) |
| F9_2 | 3296 (4)  | 2979 (2) | 9936.5 (18)  | 28.9 (12) |

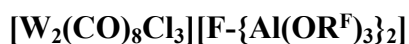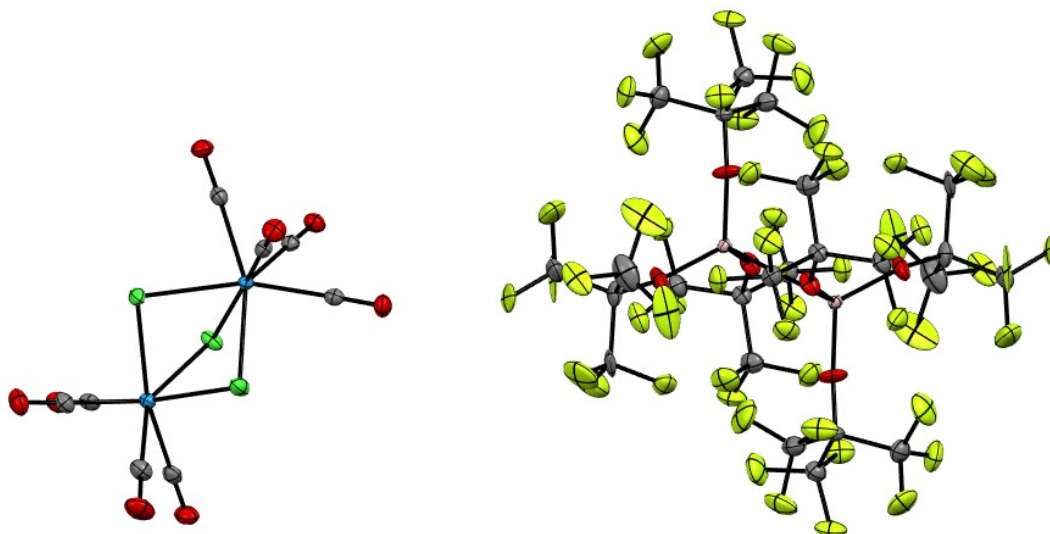

**Table 1 Crystal data and structure refinement for p-1\_crystalscale\_a.**

|                                               |                                                                           |
|-----------------------------------------------|---------------------------------------------------------------------------|
| CCDC Deposition Number                        | 1952387                                                                   |
| Identification code                           | p-1_crystalscale_a                                                        |
| Empirical formula                             | $\text{C}_{32}\text{O}_{14}\text{F}_{55}\text{Al}_2\text{Cl}_3\text{W}_2$ |
| Formula weight                                | 2181.33                                                                   |
| Temperature/K                                 | 100.02                                                                    |
| Crystal system                                | triclinic                                                                 |
| Space group                                   | P-1                                                                       |
| $a/\text{\AA}$                                | 11.3269(6)                                                                |
| $b/\text{\AA}$                                | 12.2795(6)                                                                |
| $c/\text{\AA}$                                | 23.4349(11)                                                               |
| $\alpha/^\circ$                               | 76.8830(10)                                                               |
| $\beta/^\circ$                                | 86.1610(10)                                                               |
| $\gamma/^\circ$                               | 66.4850(10)                                                               |
| Volume/ $\text{\AA}^3$                        | 2909.8(3)                                                                 |
| Z                                             | 2                                                                         |
| $\rho_{\text{calc}}/\text{cm}^3$              | 2.490                                                                     |
| $\mu/\text{mm}^{-1}$                          | 4.354                                                                     |
| F(000)                                        | 2048.0                                                                    |
| Crystal size/ $\text{mm}^3$                   | $0.2 \times 0.08 \times 0.05$                                             |
| Radiation                                     | MoK $\alpha$ ( $\lambda = 0.71073$ )                                      |
| $2\theta$ range for data collection/ $^\circ$ | 1.784 to 56.564                                                           |
| Index ranges                                  | $-15 \leq h \leq 15, -16 \leq k \leq 16, -31 \leq l \leq 31$              |
| Reflections collected                         | 76325                                                                     |
| Independent reflections                       | 14432 [ $R_{\text{int}} = 0.0278, R_{\text{sigma}} = 0.0219$ ]            |
| Data/restraints/parameters                    | 14432/9027/1206                                                           |
| Goodness-of-fit on $F^2$                      | 1.034                                                                     |
| Final R indexes [ $I \geq 2\sigma(I)$ ]       | $R_1 = 0.0190, wR_2 = 0.0382$                                             |
| Final R indexes [all data]                    | $R_1 = 0.0260, wR_2 = 0.0406$                                             |
| Largest diff. peak/hole / $e \text{\AA}^{-3}$ | 0.92/-0.83                                                                |

**Table 2 Fractional Atomic Coordinates ( $\times 10^4$ ) and Equivalent Isotropic Displacement Parameters ( $\text{\AA}^2 \times 10^3$ ) for p-1\_crystscale\_a.  $U_{eq}$  is defined as 1/3 of the trace of the orthogonalised  $U_{ij}$  tensor.**

| Atom | x            | y            | z           | U(eq)      |
|------|--------------|--------------|-------------|------------|
| W1   | 10777.7 (2)  | 8672.8 (2)   | 2664.9 (2)  | 13.96 (2)  |
| Al1  | 4302.9 (6)   | 1519.8 (6)   | 4606.9 (3)  | 10.94 (12) |
| F2   | 5000         | 5000         | 0           | 16.1 (4)   |
| O1   | 9651.0 (18)  | 11537.6 (16) | 2485.9 (8)  | 27.8 (4)   |
| C1   | 10069 (2)    | 10518 (2)    | 2546.4 (11) | 19.7 (5)   |
| Cl1  | 10964.4 (6)  | 6502.7 (5)   | 2887.0 (3)  | 22.29 (12) |
| Cl3  | 10355.7 (6)  | 8335.6 (6)   | 1683.2 (2)  | 21.55 (12) |
| O3   | 13572.5 (18) | 7220.2 (18)  | 3232.9 (9)  | 36.4 (5)   |
| C3   | 12577 (2)    | 7760 (2)     | 3022.2 (12) | 24.2 (5)   |
| O6   | 8715.7 (17)  | 4933.8 (16)  | 3058.9 (8)  | 24.1 (4)   |
| C6   | 8817 (2)     | 5747 (2)     | 2754.3 (10) | 16.7 (5)   |
| C5   | 9943 (2)     | 5705 (2)     | 1816.0 (10) | 18.0 (5)   |
| O5   | 10410.8 (18) | 4890.1 (16)  | 1610.9 (8)  | 26.3 (4)   |
| C4   | 10660 (2)    | 8944 (2)     | 3498.5 (11) | 20.7 (5)   |
| O4   | 10582.6 (18) | 9088.9 (18)  | 3960.8 (8)  | 29.8 (4)   |
| O7   | 6112.9 (16)  | 7981.0 (15)  | 2383.6 (8)  | 21.8 (4)   |
| C7   | 7182 (2)     | 7666 (2)     | 2308.8 (10) | 16.3 (4)   |
| O8   | 7817.8 (17)  | 8019.1 (16)  | 930.2 (8)   | 24.8 (4)   |
| C8   | 8241 (2)     | 7717 (2)     | 1391.5 (11) | 17.8 (5)   |
| W2   | 9098.2 (2)   | 7155.1 (2)   | 2200.9 (2)  | 12.46 (2)  |
| Al2  | 5885.8 (6)   | 3845.5 (6)   | 595.5 (3)   | 10.71 (12) |
| F1   | 5000         | 0            | 5000        | 19.0 (4)   |
| O2   | 12690.3 (18) | 9536.3 (17)  | 1836.2 (8)  | 30.4 (4)   |
| C2   | 12019 (2)    | 9224 (2)     | 2141.6 (11) | 21.0 (5)   |
| Cl2  | 8499.1 (5)   | 8926.0 (5)   | 2712.3 (3)  | 19.89 (12) |
| O1_8 | 5380 (30)    | 2160 (30)    | 4495 (18)   | 28.7 (6)   |
| C1_8 | 6496 (16)    | 2160 (12)    | 4263 (7)    | 23 (3)     |
| C2_8 | 6258 (16)    | 3381 (14)    | 3828 (7)    | 34 (4)     |
| F1_8 | 5727 (17)    | 3412 (17)    | 3336 (5)    | 66 (5)     |
| F2_8 | 7321 (15)    | 3590 (20)    | 3731 (7)    | 43 (4)     |
| F3_8 | 5397 (15)    | 4299 (11)    | 4036 (8)    | 57 (4)     |
| C3_8 | 7381 (15)    | 2058 (13)    | 4776 (6)    | 32 (3)     |
| F4_8 | 7291 (10)    | 1223 (11)    | 5222 (4)    | 31 (3)     |
| F5_8 | 6855 (15)    | 3091 (14)    | 4961 (8)    | 60 (4)     |
| F6_8 | 8587 (14)    | 1644 (17)    | 4576 (8)    | 57.5 (8)   |
| C4_8 | 7245 (16)    | 1044 (14)    | 3992 (7)    | 48 (4)     |
| F7_8 | 7789 (12)    | 74 (9)       | 4451 (8)    | 70 (5)     |
| F8_8 | 8230 (20)    | 1180 (30)    | 3687 (13)   | 43 (6)     |
| F9_8 | 6461 (14)    | 890 (20)     | 3653 (8)    | 73 (6)     |
| O1_7 | 7435 (8)     | 3525 (14)    | 440 (5)     | 15.9 (11)  |
| C1_7 | 8660 (11)    | 2749 (9)     | 385 (4)     | 18.5 (5)   |
| C2_7 | 8961 (6)     | 2449 (6)     | -230 (3)    | 30.3 (15)  |
| F1_7 | 8032 (13)    | 2173 (15)    | -396 (6)    | 58 (4)     |
| F2_7 | 10084 (5)    | 1520 (6)     | -226 (3)    | 41.2 (14)  |
| F3_7 | 9022 (10)    | 3402 (10)    | -623 (4)    | 45 (2)     |
| C3_7 | 9501 (6)     | 3405 (6)     | 511 (3)     | 29.6 (15)  |
| F4_7 | 9563 (11)    | 3339 (12)    | 1085 (4)    | 53 (2)     |
| F5_7 | 9000 (20)    | 4567 (9)     | 257 (8)     | 53 (4)     |
| F6_7 | 10702 (9)    | 2910 (14)    | 343 (5)     | 31 (2)     |
| C4_7 | 8933 (5)     | 1565 (5)     | 849 (2)     | 21.4 (13)  |
| F7_7 | 8367 (14)    | 1767 (13)    | 1352 (6)    | 40 (3)     |
| F8_7 | 10183 (6)    | 966 (6)      | 984 (4)     | 43.8 (18)  |

|      |             |             |             |           |
|------|-------------|-------------|-------------|-----------|
| F9_7 | 8523 (17)   | 814 (13)    | 677 (5)     | 26.4 (19) |
| O1_6 | 7392 (5)    | 3515 (9)    | 295 (3)     | 15.9 (11) |
| C1_6 | 8665 (7)    | 2742 (6)    | 393 (3)     | 18.5 (5)  |
| C2_6 | 8869 (4)    | 1614 (4)    | 148 (2)     | 32.1 (11) |
| F1_6 | 8466 (12)   | 862 (9)     | 519 (3)     | 37.3 (17) |
| F2_6 | 10110 (3)   | 1003 (4)    | 41 (2)      | 47.5 (10) |
| F3_6 | 8221 (8)    | 1938 (10)   | -358 (4)    | 47.7 (19) |
| C3_6 | 9467 (4)    | 3433 (5)    | 44 (2)      | 35.6 (12) |
| F4_6 | 9082 (12)   | 4532 (6)    | 145 (5)     | 45.8 (19) |
| F5_6 | 9324 (7)    | 3551 (8)    | -531 (3)    | 58.4 (19) |
| F6_6 | 10720 (6)   | 2861 (11)   | 170 (3)     | 38.4 (18) |
| C4_6 | 9137 (4)    | 2311 (4)    | 1046.1 (18) | 24.8 (10) |
| F7_6 | 9305 (7)    | 3188 (6)    | 1228 (2)    | 39.8 (12) |
| F8_6 | 10228 (4)   | 1330 (4)    | 1140 (2)    | 33.4 (9)  |
| F9_6 | 8215 (8)    | 2076 (8)    | 1373 (3)    | 28.3 (15) |
| O1_5 | 5508.7 (19) | 4475.5 (15) | 1191.6 (7)  | 25.0 (4)  |
| C1_5 | 5370 (2)    | 5350 (2)    | 1481.6 (10) | 16.2 (4)  |
| C2_5 | 5486 (3)    | 6476 (2)    | 1058.5 (11) | 23.1 (5)  |
| F1_5 | 6464.6 (18) | 6114.6 (15) | 706.5 (7)   | 39.1 (4)  |
| F2_5 | 5666.4 (16) | 7224.9 (13) | 1341.6 (7)  | 30.3 (4)  |
| F3_5 | 4435.8 (17) | 7103.8 (14) | 720.1 (7)   | 37.3 (4)  |
| C3_5 | 4022 (3)    | 5725 (2)    | 1758.7 (12) | 29.2 (6)  |
| F4_5 | 4009.0 (18) | 4883.2 (15) | 2225.5 (7)  | 41.0 (4)  |
| F5_5 | 3130.2 (16) | 5862.5 (16) | 1379.7 (9)  | 47.4 (5)  |
| F6_5 | 3678.9 (17) | 6780.9 (15) | 1924.8 (9)  | 46.2 (5)  |
| C4_5 | 6417 (3)    | 4847 (2)    | 1974.1 (12) | 28.0 (6)  |
| F7_5 | 6609.7 (18) | 3713.2 (14) | 2234.6 (7)  | 39.8 (4)  |
| F8_5 | 6101.6 (19) | 5513.1 (15) | 2380.4 (7)  | 41.8 (4)  |
| F9_5 | 7539.4 (17) | 4843.9 (18) | 1759.1 (9)  | 50.1 (5)  |
| O1_4 | 5398.4 (16) | 2685.5 (14) | 651.2 (7)   | 16.7 (3)  |
| C1_4 | 4795 (2)    | 1981 (2)    | 955.8 (10)  | 15.4 (4)  |
| C2_4 | 5536 (2)    | 1227 (2)    | 1542.3 (10) | 20.4 (5)  |
| F1_4 | 6627.8 (15) | 316.2 (13)  | 1447.1 (7)  | 30.3 (3)  |
| F2_4 | 4852.0 (16) | 729.3 (13)  | 1912.8 (6)  | 29.7 (3)  |
| F3_4 | 5875.0 (15) | 1909.3 (13) | 1809.6 (6)  | 26.2 (3)  |
| C3_4 | 3393 (2)    | 2782 (2)    | 1090.2 (11) | 23.3 (5)  |
| F4_4 | 2849.0 (15) | 3666.1 (14) | 626.3 (7)   | 35.3 (4)  |
| F5_4 | 3380.2 (15) | 3303.2 (14) | 1532.5 (7)  | 29.6 (3)  |
| F6_4 | 2663.7 (15) | 2143.5 (15) | 1233.4 (8)  | 36.1 (4)  |
| C4_4 | 4780 (3)    | 1099 (2)    | 575.4 (11)  | 23.6 (5)  |
| F7_4 | 3878.8 (16) | 1676.5 (14) | 151.4 (7)   | 32.6 (4)  |
| F8_4 | 4540.4 (18) | 162.9 (14)  | 893.4 (7)   | 34.8 (4)  |
| F9_4 | 5898.1 (16) | 657.4 (13)  | 322.1 (7)   | 31.4 (4)  |
| O1_3 | 3171.9 (16) | 2208.3 (15) | 5067.5 (8)  | 21.7 (4)  |
| C1_3 | 2746 (2)    | 3056 (2)    | 5401.2 (10) | 16.7 (4)  |
| C2_3 | 2710 (2)    | 4305 (2)    | 5048.2 (12) | 24.5 (5)  |
| F1_3 | 3895.7 (15) | 4291.2 (14) | 5005.5 (7)  | 33.2 (4)  |
| F2_3 | 1981.8 (15) | 5218.0 (13) | 5293.6 (7)  | 31.5 (4)  |
| F3_3 | 2249.0 (18) | 4533.9 (15) | 4507.8 (7)  | 40.2 (4)  |
| C3_3 | 1364 (2)    | 3184 (2)    | 5588.1 (11) | 21.3 (5)  |
| F4_3 | 1310.0 (14) | 2104.4 (14) | 5789.5 (7)  | 29.7 (3)  |
| F5_3 | 546.6 (14)  | 3745.9 (14) | 5134.4 (7)  | 30.1 (3)  |
| F6_3 | 942.0 (15)  | 3815.3 (15) | 6008.4 (7)  | 35.1 (4)  |
| C4_3 | 3632 (2)    | 2634 (2)    | 5953.9 (11) | 25.2 (5)  |

|      |             |             |             |           |
|------|-------------|-------------|-------------|-----------|
| F7_3 | 3427.7 (16) | 1749.7 (15) | 6342.8 (7)  | 35.2 (4)  |
| F8_3 | 3439.3 (16) | 3531.3 (15) | 6228.2 (7)  | 33.9 (4)  |
| F9_3 | 4862.9 (14) | 2188.3 (16) | 5813.6 (7)  | 35.8 (4)  |
| O1_2 | 3686.0 (17) | 1371.6 (17) | 4002.5 (7)  | 26.7 (4)  |
| C1_2 | 2761 (2)    | 1761 (2)    | 3580.2 (10) | 16.3 (4)  |
| C2_2 | 1407 (3)    | 2058 (3)    | 3848.8 (11) | 28.7 (6)  |
| F1_2 | 1459.4 (19) | 1259 (2)    | 4335.5 (8)  | 54.0 (5)  |
| F2_2 | 558.2 (15)  | 2053.4 (18) | 3481.4 (8)  | 43.5 (5)  |
| F3_2 | 950.2 (15)  | 3155.4 (17) | 3976.3 (7)  | 40.1 (4)  |
| C3_2 | 2771 (3)    | 2909 (2)    | 3141.6 (12) | 27.4 (6)  |
| F4_2 | 3770.8 (17) | 2620.0 (16) | 2793.5 (7)  | 39.3 (4)  |
| F5_2 | 2867.2 (18) | 3683.1 (15) | 3431.5 (9)  | 45.5 (5)  |
| F6_2 | 1698.7 (17) | 3483.9 (15) | 2804.8 (7)  | 42.4 (4)  |
| C4_2 | 3082 (2)    | 722 (2)     | 3248.8 (11) | 24.8 (5)  |
| F7_2 | 4321.3 (15) | 238.1 (14)  | 3145.2 (7)  | 31.8 (4)  |
| F8_2 | 2434.1 (16) | 1103.9 (16) | 2734.2 (7)  | 35.7 (4)  |
| F9_2 | 2765.4 (18) | -166.7 (15) | 3566.3 (8)  | 44.8 (5)  |
| O1_1 | 5486 (4)    | 2047 (5)    | 4476 (3)    | 28.7 (6)  |
| C1_1 | 6515 (3)    | 2184 (3)    | 4191.0 (15) | 18.4 (7)  |
| C2_1 | 6934 (3)    | 1410 (3)    | 3720.6 (16) | 28.9 (7)  |
| F1_1 | 6896 (3)    | 325 (2)     | 3935.9 (16) | 59.6 (9)  |
| F2_1 | 8121 (5)    | 1233 (6)    | 3536 (2)    | 57.7 (15) |
| F3_1 | 6172 (2)    | 1922 (2)    | 3249.1 (9)  | 42.4 (6)  |
| C3_1 | 6132 (4)    | 3546 (4)    | 3891.8 (18) | 30.8 (9)  |
| F4_1 | 6035 (3)    | 4197 (2)    | 4281.4 (12) | 50.0 (7)  |
| F5_1 | 5014 (3)    | 3984 (2)    | 3612.0 (15) | 62.2 (9)  |
| F6_1 | 7004 (4)    | 3691 (4)    | 3505.7 (12) | 51.5 (9)  |
| C4_1 | 7637 (4)    | 1790 (4)    | 4635.9 (19) | 45.3 (11) |
| F7_1 | 7209 (3)    | 2212 (4)    | 5117.3 (11) | 66.1 (10) |
| F8_1 | 8531 (2)    | 2220 (3)    | 4434.1 (13) | 57.5 (8)  |
| F9_1 | 8190 (3)    | 607 (3)     | 4790.0 (15) | 92.0 (12) |

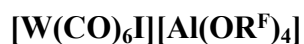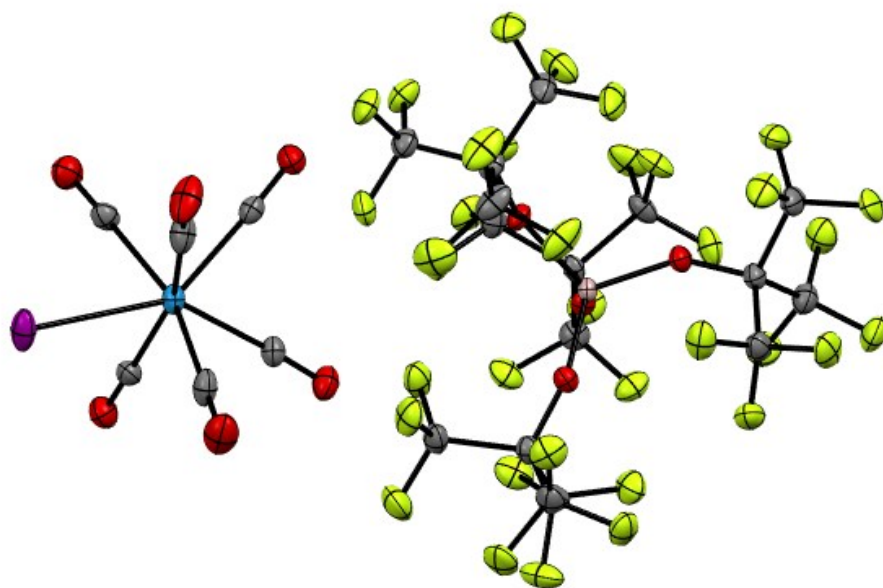

**Table 1 Crystal data and structure refinement for p21c\_neu\_a.**

|                                             |                                                                                               |
|---------------------------------------------|-----------------------------------------------------------------------------------------------|
| CCDC Deposition Number                      | 1952389                                                                                       |
| Identification code                         | p21c_neu_a                                                                                    |
| Empirical formula                           | C <sub>44</sub> O <sub>20</sub> F <sub>72</sub> Al <sub>2</sub> I <sub>2</sub> W <sub>2</sub> |
| Formula weight                              | 2891.90                                                                                       |
| Temperature/K                               | 100.0                                                                                         |
| Crystal system                              | monoclinic                                                                                    |
| Space group                                 | P2 <sub>1</sub> /c                                                                            |
| a/Å                                         | 16.4380(6)                                                                                    |
| b/Å                                         | 28.3511(10)                                                                                   |
| c/Å                                         | 17.5878(6)                                                                                    |
| α/°                                         | 90                                                                                            |
| β/°                                         | 110.764(2)                                                                                    |
| γ/°                                         | 90                                                                                            |
| Volume/Å <sup>3</sup>                       | 7664.2(5)                                                                                     |
| Z                                           | 4                                                                                             |
| ρ <sub>calc</sub> /cm <sup>3</sup>          | 2.506                                                                                         |
| μ/mm <sup>-1</sup>                          | 4.070                                                                                         |
| F(000)                                      | 5408.0                                                                                        |
| Crystal size/mm <sup>3</sup>                | 0.15 × 0.12 × 0.1                                                                             |
| Radiation                                   | MoKα (λ = 0.71073)                                                                            |
| 2θ range for data collection/°              | 2.65 to 52.86                                                                                 |
| Index ranges                                | -20 ≤ h ≤ 20, -35 ≤ k ≤ 35, -22 ≤ l ≤ 21                                                      |
| Reflections collected                       | 199573                                                                                        |
| Independent reflections                     | 15706 [R <sub>int</sub> = 0.0353, R <sub>sigma</sub> = 0.0220]                                |
| Data/restraints/parameters                  | 15706/1956/1273                                                                               |
| Goodness-of-fit on F <sup>2</sup>           | 1.054                                                                                         |
| Final R indexes [I ≥ 2σ (I)]                | R <sub>1</sub> = 0.0427, wR <sub>2</sub> = 0.1162                                             |
| Final R indexes [all data]                  | R <sub>1</sub> = 0.0503, wR <sub>2</sub> = 0.1208                                             |
| Largest diff. peak/hole / e Å <sup>-3</sup> | 4.91/-2.19                                                                                    |

**Table 2 Fractional Atomic Coordinates ( $\times 10^4$ ) and Equivalent Isotropic Displacement Parameters ( $\text{\AA}^2 \times 10^3$ ) for p21c\_neu\_a.  $U_{eq}$  is defined as 1/3 of the trace of the orthogonalised  $U_{ij}$  tensor.**

| Atom | x           | y           | z           | U(eq)      |
|------|-------------|-------------|-------------|------------|
| W1   | 4375.5 (2)  | 8886.2 (2)  | 2405.4 (2)  | 16.60 (7)  |
| O1   | 5313 (4)    | 7886.5 (19) | 2835 (4)    | 40.1 (14)  |
| C1   | 4967 (5)    | 8237 (2)    | 2657 (5)    | 27.4 (15)  |
| I1   | 3700.4 (3)  | 9614.4 (2)  | 3051.6 (3)  | 26.42 (11) |
| W2   | -728.9 (2)  | 6269.5 (2)  | 1888.0 (2)  | 19.37 (8)  |
| O2   | 5968 (3)    | 9069 (2)    | 4089 (3)    | 36.3 (13)  |
| C2   | 5417 (4)    | 8987 (3)    | 3511 (4)    | 25.2 (14)  |
| I2   | -1740.7 (3) | 5700.5 (2)  | 2475.9 (3)  | 32.99 (12) |
| Al05 | 8285.6 (11) | 6182.1 (6)  | 6054.6 (11) | 11.8 (3)   |
| O5   | 3040 (3)    | 8282.4 (18) | 3004 (3)    | 27.0 (9)   |
| C5   | 3504 (4)    | 8479 (3)    | 2862 (5)    | 27.0 (9)   |
| C4   | 3180 (4)    | 8989 (2)    | 1435 (4)    | 18.3 (12)  |
| O4   | 2547 (3)    | 9054.7 (17) | 929 (3)     | 25.9 (10)  |
| C3   | 5080 (4)    | 9449 (2)    | 2156 (4)    | 20.4 (12)  |
| O3   | 5449 (3)    | 9764.0 (17) | 2058 (3)    | 27.7 (11)  |
| Al06 | 3256.7 (11) | 6461.9 (6)  | 1169.3 (11) | 13.8 (3)   |
| O6   | 4723 (4)    | 8530 (2)    | 827 (3)     | 38.4 (13)  |
| C6   | 4607 (5)    | 8650 (3)    | 1402 (5)    | 28.5 (14)  |
| C12  | -321 (5)    | 5613 (3)    | 1599 (5)    | 27.8 (14)  |
| O12  | -96 (4)     | 5255 (2)    | 1465 (4)    | 42.4 (14)  |
| C11  | -396 (4)    | 6404 (2)    | 882 (4)     | 21.1 (13)  |
| O11  | -246 (3)    | 6464.3 (19) | 315 (3)     | 29.1 (11)  |
| C10  | -1930 (4)   | 6319 (2)    | 920 (4)     | 21.5 (13)  |
| O10  | -2581 (3)   | 6339.7 (19) | 414 (3)     | 30.2 (11)  |
| C9   | -1366 (4)   | 6787 (2)    | 2346 (4)    | 24.4 (14)  |
| O9   | -1698 (3)   | 7045.6 (19) | 2615 (3)    | 32.2 (11)  |
| C8   | 81 (4)      | 6850 (2)    | 2141 (4)    | 20.1 (12)  |
| O8   | 509 (3)     | 7168.5 (19) | 2304 (3)    | 28.6 (11)  |
| C7   | 239 (5)     | 6077 (3)    | 2994 (5)    | 31.2 (16)  |
| O7   | 749 (4)     | 5960 (3)    | 3592 (3)    | 45.9 (16)  |
| O1_8 | 2561 (3)    | 6845.5 (15) | 475 (3)     | 17.0 (9)   |
| C1_8 | 2191 (4)    | 7276 (2)    | 342 (4)     | 18.0 (11)  |
| C2_8 | 1675 (4)    | 7377 (2)    | 919 (4)     | 23.2 (13)  |
| F1_8 | 1283 (3)    | 6982.4 (15) | 1028 (3)    | 32.2 (9)   |
| F2_8 | 1056 (3)    | 7704.4 (15) | 622 (3)     | 33.5 (10)  |
| F3_8 | 2188 (3)    | 7517.8 (15) | 1650 (2)    | 32.3 (9)   |
| C3_8 | 2902 (4)    | 7664 (2)    | 491 (4)     | 23.7 (13)  |
| F4_8 | 3224 (3)    | 7666.2 (15) | -96 (3)     | 32.2 (9)   |
| F5_8 | 3566 (3)    | 7582.5 (14) | 1183 (3)    | 30.0 (9)   |
| F6_8 | 2601 (3)    | 8096.8 (14) | 544 (3)     | 36.3 (10)  |
| C4_8 | 1549 (4)    | 7301 (2)    | -557 (4)    | 23.6 (13)  |
| F7_8 | 1906 (3)    | 7115.0 (15) | -1048 (2)   | 29.7 (9)   |
| F8_8 | 1327 (3)    | 7745.9 (15) | -803 (3)    | 31.1 (9)   |
| F9_8 | 827 (3)     | 7065.1 (15) | -642 (3)    | 30.7 (9)   |
| O1_7 | 2999 (3)    | 5892.1 (15) | 819 (3)     | 19.1 (9)   |
| C1_7 | 2383 (4)    | 5591 (2)    | 367 (4)     | 20.2 (12)  |
| C2_7 | 2822 (5)    | 5106 (2)    | 370 (5)     | 26.5 (13)  |
| F1_7 | 3281 (3)    | 5107.7 (15) | -122 (3)    | 33.0 (10)  |
| F2_7 | 2252 (3)    | 4748.9 (14) | 135 (3)     | 35.8 (10)  |
| F3_7 | 3375 (3)    | 5004.9 (14) | 1118 (3)    | 31.6 (9)   |
| C3_7 | 1646 (4)    | 5528 (2)    | 732 (4)     | 24.9 (13)  |
| F4_7 | 1426 (3)    | 5949.5 (15) | 945 (3)     | 32.9 (10)  |

|      |          |             |           |           |
|------|----------|-------------|-----------|-----------|
| F5_7 | 1938 (3) | 5271.7 (15) | 1410 (3)  | 34.8 (10) |
| F6_7 | 942 (3)  | 5322.8 (17) | 228 (3)   | 40.7 (11) |
| C4_7 | 1957 (5) | 5768 (2)    | -527 (4)  | 26.1 (13) |
| F7_7 | 1343 (3) | 6086.8 (15) | -594 (3)  | 33.1 (10) |
| F8_7 | 1601 (3) | 5415.6 (16) | -1041 (3) | 39.3 (11) |
| F9_7 | 2552 (3) | 5964.0 (16) | -775 (3)  | 31.7 (9)  |
| O1_6 | 3111 (3) | 6555.7 (16) | 2084 (3)  | 19.3 (9)  |
| C1_6 | 3423 (4) | 6484 (2)    | 2896 (4)  | 20.4 (12) |
| C2_6 | 4142 (4) | 6852 (3)    | 3317 (4)  | 27.9 (14) |
| F1_6 | 4883 (3) | 6732 (2)    | 3216 (3)  | 43.3 (12) |
| F2_6 | 4313 (3) | 6880.9 (18) | 4118 (2)  | 37.1 (11) |
| F3_6 | 3921 (3) | 7277.7 (17) | 2999 (3)  | 41.9 (11) |
| C3_6 | 2649 (5) | 6555 (3)    | 3204 (4)  | 25.4 (13) |
| F4_6 | 1941 (3) | 6336.9 (17) | 2716 (3)  | 35.3 (10) |
| F5_6 | 2447 (3) | 7010.5 (15) | 3195 (3)  | 30.4 (9)  |
| F6_6 | 2821 (3) | 6394.5 (16) | 3956 (2)  | 31.7 (9)  |
| C4_6 | 3789 (5) | 5977 (3)    | 3106 (4)  | 32.6 (15) |
| F7_6 | 3141 (4) | 5661.5 (16) | 2917 (3)  | 44.0 (12) |
| F8_6 | 4255 (3) | 5923.7 (19) | 3892 (3)  | 43.3 (12) |
| F9_6 | 4287 (3) | 5868.2 (18) | 2678 (3)  | 43.3 (12) |
| O1_5 | 4331 (3) | 6570.7 (16) | 1296 (3)  | 20.2 (9)  |
| C1_5 | 5004 (4) | 6507 (2)    | 1052 (4)  | 19.5 (12) |
| C2_5 | 4884 (5) | 6811 (3)    | 274 (4)   | 26.2 (13) |
| F1_5 | 4074 (3) | 6759.8 (17) | -254 (3)  | 35.6 (10) |
| F2_5 | 5425 (3) | 6683.1 (16) | -105 (3)  | 33.0 (10) |
| F3_5 | 5012 (3) | 7262.8 (15) | 453 (3)   | 34.3 (10) |
| C3_5 | 5845 (4) | 6680 (3)    | 1742 (4)  | 27.2 (14) |
| F4_5 | 6083 (3) | 6365.9 (18) | 2353 (3)  | 37.3 (10) |
| F5_5 | 5705 (3) | 7084.1 (17) | 2043 (3)  | 34.5 (10) |
| F6_5 | 6519 (3) | 6737.1 (17) | 1496 (3)  | 36.4 (10) |
| C4_5 | 5122 (4) | 5983 (3)    | 858 (5)   | 25.5 (13) |
| F7_5 | 4984 (3) | 5702.9 (15) | 1404 (3)  | 33.9 (10) |
| F8_5 | 5917 (3) | 5886.4 (15) | 850 (3)   | 33.2 (10) |
| F9_5 | 4553 (3) | 5859.3 (15) | 132 (3)   | 32.2 (9)  |
| O1_4 | 8278 (3) | 6717.5 (15) | 5597 (3)  | 18.7 (9)  |
| C1_4 | 7821 (4) | 7051 (2)    | 5066 (4)  | 20.3 (12) |
| C2_4 | 7104 (5) | 7263 (3)    | 5332 (5)  | 32.5 (15) |
| F1_4 | 6686 (3) | 6928.2 (18) | 5573 (3)  | 40.3 (11) |
| F2_4 | 6530 (3) | 7519.1 (19) | 4762 (3)  | 49.9 (13) |
| F3_4 | 7470 (4) | 7548.7 (17) | 5986 (3)  | 47.5 (13) |
| C3_4 | 8479 (5) | 7440 (2)    | 5042 (4)  | 26.7 (14) |
| F4_4 | 8943 (3) | 7313.1 (15) | 4603 (3)  | 34.4 (10) |
| F5_4 | 9034 (3) | 7528.5 (15) | 5797 (3)  | 42.4 (12) |
| F6_4 | 8085 (3) | 7848.9 (14) | 4748 (3)  | 34.7 (10) |
| C4_4 | 7395 (5) | 6843 (3)    | 4189 (4)  | 25.9 (13) |
| F7_4 | 7929 (3) | 6552.4 (15) | 4019 (3)  | 32.7 (10) |
| F8_4 | 7175 (3) | 7184.1 (16) | 3631 (2)  | 34.8 (10) |
| F9_4 | 6680 (3) | 6602.6 (17) | 4129 (3)  | 37.4 (10) |
| O1_3 | 7601 (3) | 5814.8 (15) | 5330 (3)  | 19.3 (9)  |
| C1_3 | 7146 (4) | 5400 (2)    | 5195 (4)  | 20.8 (12) |
| C2_3 | 7780 (5) | 4980 (2)    | 5537 (5)  | 27.2 (14) |
| F1_3 | 8255 (3) | 4898.9 (15) | 5078 (3)  | 32.5 (10) |
| F2_3 | 7360 (3) | 4579.7 (15) | 5561 (3)  | 38.2 (11) |
| F3_3 | 8326 (3) | 5069.6 (15) | 6281 (3)  | 35.3 (10) |



|      |           |             |          |           |
|------|-----------|-------------|----------|-----------|
| C3_3 | 6459 (5)  | 5403 (3)    | 5612 (6) | 41.4 (18) |
| F4_3 | 6071 (3)  | 5813 (2)    | 5526 (4) | 58.8 (16) |
| F5_3 | 6836 (4)  | 5319.4 (19) | 6416 (3) | 51.6 (13) |
| F6_3 | 5851 (3)  | 5076 (2)    | 5304 (4) | 64.8 (18) |
| C4_3 | 6700 (5)  | 5347 (3)    | 4261 (5) | 31.2 (15) |
| F7_3 | 6015 (3)  | 5630.0 (18) | 3990 (3) | 55.3 (15) |
| F8_3 | 6406 (3)  | 4903.7 (15) | 4058 (3) | 36.6 (11) |
| F9_3 | 7238 (3)  | 5447.7 (18) | 3882 (3) | 41.0 (11) |
| O1_2 | 7905 (3)  | 6206.4 (15) | 6851 (3) | 17.7 (9)  |
| C1_2 | 8066 (4)  | 6325 (2)    | 7636 (4) | 19.1 (12) |
| C2_2 | 8883 (4)  | 6635 (3)    | 7990 (4) | 25.0 (13) |
| F1_2 | 9599 (3)  | 6360.4 (18) | 8203 (3) | 38.1 (11) |
| F2_2 | 8917 (3)  | 6870.5 (15) | 8654 (2) | 27.6 (9)  |
| F3_2 | 8962 (3)  | 6938.6 (14) | 7454 (2) | 26.4 (8)  |
| C3_2 | 7266 (5)  | 6622 (3)    | 7650 (5) | 29.7 (14) |
| F4_2 | 6528 (3)  | 6425.5 (17) | 7163 (3) | 35.7 (10) |
| F5_2 | 7300 (3)  | 7063.0 (16) | 7419 (3) | 40.3 (11) |
| F6_2 | 7203 (3)  | 6624.1 (19) | 8399 (3) | 43.8 (12) |
| C4_2 | 8154 (5)  | 5875 (3)    | 8145 (5) | 34.6 (15) |
| F7_2 | 7348 (3)  | 5681.6 (17) | 7995 (3) | 41.8 (11) |
| F8_2 | 8508 (4)  | 5961 (2)    | 8948 (3) | 56.0 (15) |
| F9_2 | 8662 (3)  | 5558.0 (16) | 7956 (3) | 42.4 (11) |
| O1_1 | 9349 (3)  | 5991.5 (16) | 6430 (3) | 18.0 (9)  |
| C1_1 | 10114 (4) | 5964 (2)    | 6304 (4) | 15.7 (11) |
| C2_1 | 9990 (4)  | 6030 (2)    | 5390 (4) | 20.2 (12) |
| F1_1 | 9278 (3)  | 5813.0 (15) | 4916 (2) | 28.3 (9)  |
| F2_1 | 10671 (3) | 5852.6 (16) | 5224 (2) | 28.9 (9)  |
| F3_1 | 9923 (3)  | 6482.7 (15) | 5185 (2) | 27.7 (9)  |
| C3_1 | 10753 (4) | 6345 (2)    | 6826 (4) | 21.0 (12) |
| F4_1 | 11049 (3) | 6228.2 (16) | 7607 (2) | 29.4 (9)  |
| F5_1 | 10350 (3) | 6757.3 (14) | 6750 (3) | 28.2 (9)  |
| F6_1 | 11441 (2) | 6407.0 (14) | 6596 (3) | 25.9 (8)  |
| C4_1 | 10507 (4) | 5463 (2)    | 6584 (4) | 23.5 (13) |
| F7_1 | 10402 (3) | 5343.0 (15) | 7267 (3) | 29.9 (9)  |
| F8_1 | 11357 (2) | 5447.8 (15) | 6710 (3) | 30.6 (9)  |
| F9_1 | 10109 (3) | 5139.8 (14) | 6028 (3) | 30.3 (9)  |

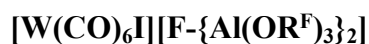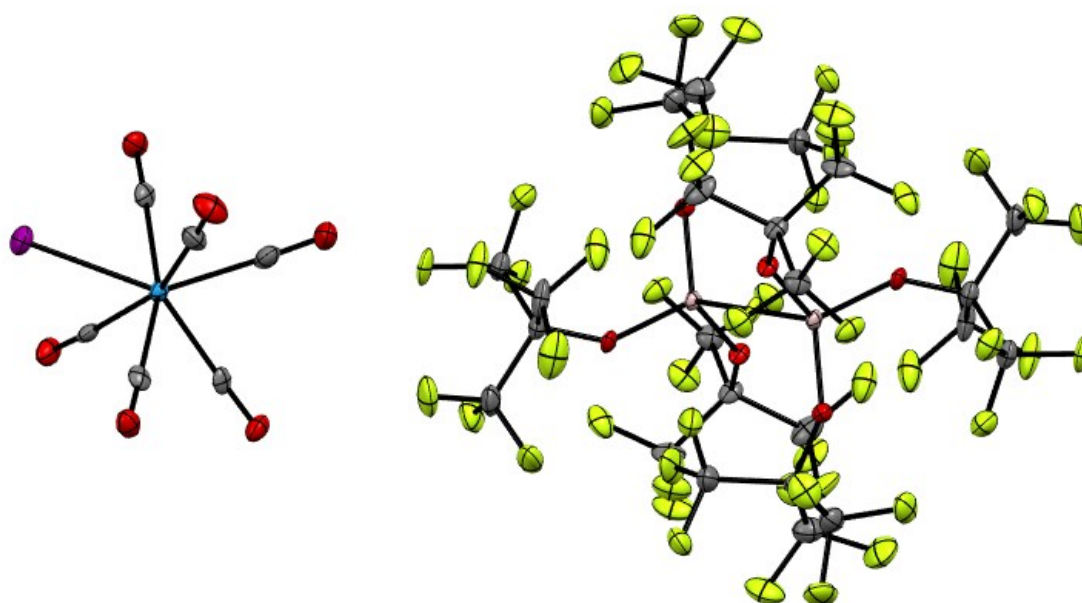

**Table 1 Crystal data and structure refinement for p-1\_a.**

|                                               |                                                               |
|-----------------------------------------------|---------------------------------------------------------------|
| CCDC Deposition Number                        | 1952388                                                       |
| Identification code                           | p-1_a                                                         |
| Empirical formula                             | $\text{C}_{30}\text{O}_{12}\text{F}_{55}\text{Al}_2\text{IW}$ |
| Formula weight                                | 1962.01                                                       |
| Temperature/K                                 | 100.05                                                        |
| Crystal system                                | triclinic                                                     |
| Space group                                   | P-1                                                           |
| $a/\text{\AA}$                                | 10.5119(7)                                                    |
| $b/\text{\AA}$                                | 12.5617(8)                                                    |
| $c/\text{\AA}$                                | 21.1226(15)                                                   |
| $\alpha/^\circ$                               | 85.595(2)                                                     |
| $\beta/^\circ$                                | 76.545(3)                                                     |
| $\gamma/^\circ$                               | 78.485(2)                                                     |
| Volume/ $\text{\AA}^3$                        | 2656.7(3)                                                     |
| $Z$                                           | 2                                                             |
| $\rho_{\text{calc}}/\text{g/cm}^3$            | 2.453                                                         |
| $\mu/\text{mm}^{-1}$                          | 3.038                                                         |
| $F(000)$                                      | 1848.0                                                        |
| Crystal size/ $\text{mm}^3$                   | $0.2 \times 0.15 \times 0.15$                                 |
| Radiation                                     | MoK $\alpha$ ( $\lambda = 0.71073$ )                          |
| $2\theta$ range for data collection/ $^\circ$ | 1.984 to 50.698                                               |
| Index ranges                                  | $-12 \leq h \leq 12, -15 \leq k \leq 15, -25 \leq l \leq 25$  |
| Reflections collected                         | 56910                                                         |
| Independent reflections                       | 9734 [ $R_{\text{int}} = 0.0756, R_{\text{sigma}} = 0.0569$ ] |
| Data/restraints/parameters                    | 9734/1431/913                                                 |
| Goodness-of-fit on $F^2$                      | 1.061                                                         |
| Final R indexes [ $I \geq 2\sigma(I)$ ]       | $R_1 = 0.0424, wR_2 = 0.0867$                                 |
| Final R indexes [all data]                    | $R_1 = 0.0615, wR_2 = 0.0933$                                 |
| Largest diff. peak/hole / $e \text{\AA}^{-3}$ | 2.01/-2.16                                                    |

**Table 2 Fractional Atomic Coordinates ( $\times 10^4$ ) and Equivalent Isotropic Displacement Parameters ( $\text{\AA}^2 \times 10^3$ ) for p-1\_a.  $U_{\text{eq}}$  is defined as 1/3 of the trace of the orthogonalised  $U_{ij}$  tensor.**

| Atom | x            | y           | z            | $U_{\text{eq}}$ |
|------|--------------|-------------|--------------|-----------------|
| W1   | 2897.8 (3)   | 179.6 (2)   | 7450.6 (2)   | 13.82 (8)       |
| F1   | 10000        | 5000        | 5000         | 13.3 (10)       |
| Al1  | 10116.5 (17) | 3676.7 (13) | 4732.8 (8)   | 11.1 (4)        |
| O1   | 2265 (5)     | -470 (3)    | 6126 (2)     | 24.0 (10)       |
| C1   | 2498 (6)     | -235 (5)    | 6579 (3)     | 18.5 (13)       |
| I1   | 450.2 (4)    | -431.8 (3)  | 7921.8 (2)   | 22.89 (11)      |
| O3   | 4368 (5)     | 1690 (4)    | 6367 (2)     | 32.4 (12)       |
| C3   | 3872 (6)     | 1150 (6)    | 6756 (3)     | 23.2 (14)       |
| O4   | 5906 (4)     | -31 (3)     | 7567 (2)     | 22.7 (10)       |
| C4   | 4848 (6)     | 29 (5)      | 7531 (3)     | 16.3 (13)       |
| O5   | 2632 (5)     | 540 (3)     | 8984 (2)     | 23.8 (10)       |
| C5   | 2733 (6)     | 422 (5)     | 8454 (3)     | 17.8 (13)       |
| O6   | 3787 (4)     | -2451 (3)   | 7469 (2)     | 25.8 (11)       |
| C6   | 3526 (6)     | -1547 (5)   | 7465 (3)     | 18.6 (13)       |
| C2   | 1665 (7)     | 1722 (5)    | 7564 (3)     | 22.3 (14)       |
| O2   | 968 (5)      | 2525 (4)    | 7623 (2)     | 33.3 (12)       |
| Al2  | 4746.8 (17)  | 6409.8 (13) | 114.5 (8)    | 11.3 (4)        |
| F2   | 5000         | 5000        | 0            | 14.9 (10)       |
| O1_6 | 5598 (4)     | 6969 (3)    | -573.2 (19)  | 17.9 (9)        |
| C1_6 | 6673 (6)     | 7409 (5)    | -875 (3)     | 15.1 (12)       |
| C2_6 | 6527 (7)     | 8577 (6)    | -636 (3)     | 25.5 (14)       |
| F1_6 | 5619 (4)     | 9279 (3)    | -879 (2)     | 36.7 (10)       |
| F2_6 | 7678 (4)     | 8941 (3)    | -808 (2)     | 34.4 (10)       |
| F3_6 | 6130 (4)     | 8606 (3)    | 7.6 (19)     | 37.1 (10)       |
| C3_6 | 7980 (7)     | 6705 (5)    | -751 (4)     | 27.4 (14)       |
| F4_6 | 7918 (4)     | 5659 (3)    | -754 (3)     | 49.1 (13)       |
| F5_6 | 8159 (4)     | 6900 (4)    | -167 (2)     | 48.3 (12)       |
| F6_6 | 9052 (4)     | 6885 (3)    | -1198 (2)    | 35.6 (10)       |
| C4_6 | 6729 (6)     | 7484 (5)    | -1614 (3)    | 21.4 (13)       |
| F7_6 | 7164 (4)     | 6519 (3)    | -1877.4 (19) | 36.6 (10)       |
| F8_6 | 7516 (4)     | 8160 (3)    | -1936.4 (17) | 24.8 (8)        |
| F9_6 | 5520 (4)     | 7848 (3)    | -1727.9 (19) | 34.3 (10)       |
| O1_5 | 3065 (4)     | 6716 (3)    | 189 (2)      | 20.2 (10)       |
| C1_5 | 1963 (6)     | 7500 (5)    | 195 (3)      | 18.2 (12)       |
| C2_5 | 1666 (6)     | 7658 (5)    | -487 (3)     | 23.4 (13)       |
| F1_5 | 2560 (4)     | 8182 (3)    | -884.8 (18)  | 29.7 (9)        |
| F2_5 | 462 (4)      | 8238 (3)    | -484 (2)     | 31.5 (9)        |
| F3_5 | 1770 (4)     | 6721 (3)    | -752 (2)     | 36.9 (10)       |
| C3_5 | 784 (6)      | 7106 (5)    | 684 (3)      | 26.0 (14)       |
| F4_5 | 1141 (4)     | 6710 (4)    | 1230 (2)     | 43.5 (11)       |
| F5_5 | 376 (4)      | 6336 (3)    | 438 (2)      | 40.4 (11)       |
| F6_5 | -243 (4)     | 7935 (3)    | 848 (2)      | 41.6 (11)       |
| C4_5 | 2154 (6)     | 8603 (5)    | 427 (3)      | 24.1 (14)       |
| F7_5 | 2076 (4)     | 8572 (3)    | 1060 (2)     | 40.7 (11)       |
| F8_5 | 1252 (4)     | 9437 (3)    | 282 (2)      | 31.0 (9)        |
| F9_5 | 3352 (4)     | 8794 (3)    | 132 (2)      | 33.5 (10)       |
| O1_4 | 5337 (4)     | 6572 (3)    | 775.4 (19)   | 21.0 (10)       |
| C1_4 | 5436 (6)     | 6337 (5)    | 1401 (3)     | 17.1 (12)       |
| C2_4 | 4817 (7)     | 5331 (5)    | 1680 (3)     | 24.7 (14)       |
| F1_4 | 3658 (4)     | 5413 (3)    | 1500 (2)     | 37.9 (10)       |
| F2_4 | 4589 (4)     | 5236 (3)    | 2320.4 (18)  | 37.5 (10)       |
| F3_4 | 5603 (4)     | 4421 (3)    | 1429.4 (19)  | 34.1 (10)       |

|      |           |          |             |           |
|------|-----------|----------|-------------|-----------|
| C3_4 | 6930 (7)  | 6114 (6) | 1418 (3)    | 26.1 (14) |
| F4_4 | 7403 (4)  | 7040 (3) | 1343 (2)    | 34.1 (10) |
| F5_4 | 7643 (4)  | 5473 (3) | 942 (2)     | 35.5 (10) |
| F6_4 | 7151 (4)  | 5628 (4) | 1975 (2)    | 44.2 (11) |
| C4_4 | 4715 (7)  | 7337 (5) | 1819 (3)    | 25.4 (14) |
| F7_4 | 4949 (4)  | 8256 (3) | 1493.2 (19) | 33.0 (10) |
| F8_4 | 5126 (4)  | 7321 (3) | 2379.0 (18) | 37.9 (10) |
| F9_4 | 3402 (4)  | 7387 (3) | 1970 (2)    | 40.3 (11) |
| O1_3 | 9305 (4)  | 3788 (3) | 4116.3 (19) | 15.7 (9)  |
| C1_3 | 8998 (6)  | 4264 (5) | 3561 (3)    | 15.8 (12) |
| C2_3 | 10046 (7) | 4934 (5) | 3205 (3)    | 26.1 (14) |
| F1_3 | 9847 (5)  | 5883 (3) | 3509 (2)    | 39.3 (11) |
| F2_3 | 10006 (4) | 5171 (3) | 2583.7 (18) | 28.9 (9)  |
| F3_3 | 11263 (4) | 4424 (3) | 3226.2 (19) | 31.6 (9)  |
| C3_3 | 8965 (7)  | 3358 (5) | 3103 (3)    | 24.6 (14) |
| F4_3 | 8335 (4)  | 2602 (3) | 3435.4 (18) | 29.8 (9)  |
| F5_3 | 10199 (4) | 2875 (3) | 2832.9 (19) | 33.3 (10) |
| F6_3 | 8340 (4)  | 3757 (3) | 2628.0 (19) | 35.4 (10) |
| C4_3 | 7609 (7)  | 5022 (6) | 3732 (3)    | 28.0 (14) |
| F7_3 | 6641 (4)  | 4421 (4) | 3861 (2)    | 40.7 (11) |
| F8_3 | 7386 (4)  | 5735 (3) | 3254 (2)    | 38.7 (10) |
| F9_3 | 7499 (4)  | 5571 (3) | 4255.1 (19) | 35.2 (10) |
| O1_2 | 9444 (4)  | 2919 (3) | 5386.6 (19) | 14.6 (9)  |
| C1_2 | 8316 (6)  | 2535 (5) | 5683 (3)    | 17.8 (12) |
| C2_2 | 7199 (7)  | 3492 (5) | 5954 (3)    | 26.3 (14) |
| F1_2 | 7391 (4)  | 3850 (3) | 6498 (2)    | 42.0 (11) |
| F2_2 | 5987 (4)  | 3235 (3) | 6102 (2)    | 37.2 (11) |
| F3_2 | 7180 (4)  | 4326 (3) | 5524 (2)    | 36.5 (10) |
| C3_2 | 7855 (6)  | 1922 (5) | 5193 (3)    | 20.2 (13) |
| F4_2 | 8891 (4)  | 1344 (3) | 4800.5 (18) | 26.6 (9)  |
| F5_2 | 7200 (4)  | 2607 (3) | 4813.5 (19) | 29.6 (9)  |
| F6_2 | 7053 (4)  | 1245 (3) | 5488.1 (19) | 29.7 (9)  |
| C4_2 | 8641 (7)  | 1727 (5) | 6248 (3)    | 26.7 (14) |
| F7_2 | 9336 (4)  | 784 (3)  | 6011 (2)    | 35.0 (10) |
| F8_2 | 7537 (4)  | 1531 (3) | 6662.2 (19) | 37.5 (10) |
| F9_2 | 9367 (5)  | 2109 (3) | 6578.2 (19) | 40.8 (11) |
| O1_1 | 11809 (4) | 3266 (3) | 4522.9 (19) | 13.4 (9)  |
| C1_1 | 12806 (6) | 2374 (5) | 4415 (3)    | 15.8 (12) |
| C2_1 | 12734 (6) | 1751 (5) | 3821 (3)    | 20.6 (13) |
| F1_1 | 11497 (4) | 1651 (3) | 3849.6 (18) | 26.5 (9)  |
| F2_1 | 13490 (4) | 754 (3)  | 3800.5 (18) | 28.1 (9)  |
| F3_1 | 13159 (4) | 2271 (3) | 3265.0 (17) | 28.2 (9)  |
| C3_1 | 14139 (6) | 2792 (6) | 4274 (3)    | 26.8 (14) |
| F4_1 | 14382 (4) | 3099 (4) | 4813 (2)    | 39.9 (11) |
| F5_1 | 14133 (4) | 3630 (3) | 3847 (2)    | 35.7 (10) |
| F6_1 | 15181 (3) | 2016 (3) | 4017 (2)    | 32.4 (10) |
| C4_1 | 12721 (6) | 1589 (5) | 5024 (3)    | 24.3 (14) |
| F7_1 | 12388 (4) | 2146 (3) | 5570.6 (18) | 32.0 (9)  |
| F8_1 | 13862 (4) | 903 (3)  | 5028 (2)    | 37.8 (10) |
| F9_1 | 11779 (4) | 1004 (3) | 5047.7 (18) | 28.7 (9)  |

## 9. Additional Information on the DFT Calculations

**[Mo(CO)<sub>5</sub>(NO)]<sup>+</sup> (C<sub>4v</sub> symmetry @BP86-D3BJ/def2-TZVPP)**

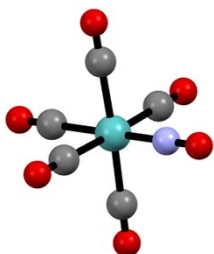

```
$coord
0.0000000000000000 0.0000000000000000 0.17179883705835 mo
0.0000000000000000 0.0000000000000000 3.71136986552370 n
-0.0000000000000000 0.0000000000000000 -3.89860523064888 c
0.0000000000000000 3.95400222689897 0.05010768760119 c
-0.0000000000000000 -3.95400222689897 0.05010768760119 c
-3.95400222689897 0.0000000000000000 0.05010768760119 c
3.95400222689897 -0.0000000000000000 0.05010768760119 c
0.0000000000000000 0.0000000000000000 5.88106162267458 o
-6.10667488923017 -0.0000000000000000 -0.00586949166384 o
-0.0000000000000000 6.10667488923017 -0.00586949166384 o
0.0000000000000000 -6.10667488923017 -0.00586949166384 o
0.0000000000000000 0.0000000000000000 -6.04257787835731 o
6.10667488923017 0.0000000000000000 -0.00586949166384 o
```

```
$vibrational spectrum
# mode symmetry wave number IR intensity selection rules
# cm**(-1) km/mol IR RAMAN
1 -0.00 0.00000 - -
2 -0.00 0.00000 - -
3 -0.00 0.00000 - -
4 0.00 0.00000 - -
5 0.00 0.00000 - -
6 0.00 0.00000 - -
7 e 51.94 0.00191 YES YES
8 e 51.94 0.00191 YES YES
9 b1 63.04 0.00000 NO YES
10 b2 77.76 0.00000 NO YES
11 e 78.63 0.19554 YES YES
12 e 78.63 0.19554 YES YES
13 a1 84.29 1.23255 YES YES
14 e 85.28 0.43183 YES YES
15 e 85.28 0.43183 YES YES
16 e 318.26 0.02940 YES YES
17 e 318.26 0.02940 YES YES
18 a1 327.20 20.85486 YES YES
19 a2 328.70 0.00000 NO NO
20 e 355.82 39.64616 YES YES
21 e 355.82 39.64616 YES YES
22 b1 369.37 0.00000 NO YES
23 a1 384.18 1.19842 YES YES
24 e 424.64 1.83503 YES YES
25 e 424.64 1.83503 YES YES
26 b2 453.30 0.00000 NO YES
27 b1 464.53 0.00000 NO YES
28 a1 485.22 3.38567 YES YES
```

|    |    |         |            |     |     |
|----|----|---------|------------|-----|-----|
| 29 | e  | 521.42  | 24.19389   | YES | YES |
| 30 | e  | 521.42  | 24.19389   | YES | YES |
| 31 | a1 | 570.49  | 85.30854   | YES | YES |
| 32 | e  | 629.93  | 40.44970   | YES | YES |
| 33 | e  | 629.93  | 40.44970   | YES | YES |
| 34 | a1 | 1877.24 | 1100.05878 | YES | YES |
| 35 | e  | 2077.62 | 1147.11919 | YES | YES |
| 36 | e  | 2077.62 | 1147.11919 | YES | YES |
| 37 | b1 | 2092.48 | 0.00000    | NO  | YES |
| 38 | a1 | 2121.37 | 234.88359  | YES | YES |
| 39 | a1 | 2162.27 | 109.87714  | YES | YES |

\$end

**[W(CO)<sub>5</sub>(NO)]<sup>+</sup> (C<sub>4v</sub> symmetry @BP86-D3BJ/def2-TZVPP)**

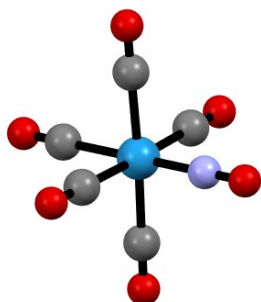

\$coord

|                    |                    |                   |   |
|--------------------|--------------------|-------------------|---|
| -0.000000000000000 | 0.000000000000000  | 0.16408012946431  | w |
| 0.000000000000000  | 0.000000000000000  | 3.73610638653136  | n |
| 0.000000000000000  | 0.000000000000000  | -3.91103579450310 | c |
| -0.000000000000000 | -3.96763375642796  | 0.04737839894420  | c |
| 0.000000000000000  | 3.96763375642796   | 0.04737839894420  | c |
| 3.96763375642796   | -0.000000000000000 | 0.04737839894420  | c |
| -3.96763375642796  | 0.000000000000000  | 0.04737839894420  | c |
| 0.000000000000000  | 0.000000000000000  | 5.91129247093002  | o |
| 6.12260688497221   | -0.000000000000000 | -0.00822252816875 | o |
| -0.000000000000000 | -6.12260688497221  | -0.00822252816875 | o |
| 0.000000000000000  | 6.12260688497221   | -0.00822252816875 | o |
| 0.000000000000000  | 0.000000000000000  | -6.05706667552446 | o |
| -6.12260688497221  | 0.000000000000000  | -0.00822252816875 | o |

\$vibrational spectrum

| #  | mode | symmetry | wave number<br>cm**(-1) | IR intensity<br>km/mol | selection rules<br>IR | RAMAN |
|----|------|----------|-------------------------|------------------------|-----------------------|-------|
| 1  |      |          | -0.00                   | 0.00000                | -                     | -     |
| 2  |      |          | -0.00                   | 0.00000                | -                     | -     |
| 3  |      |          | -0.00                   | 0.00000                | -                     | -     |
| 4  |      |          | 0.00                    | 0.00000                | -                     | -     |
| 5  |      |          | 0.00                    | 0.00000                | -                     | -     |
| 6  |      |          | 0.00                    | 0.00000                | -                     | -     |
| 7  |      | e        | 51.93                   | 0.00040                | YES                   | YES   |
| 8  |      | e        | 51.93                   | 0.00040                | YES                   | YES   |
| 9  |      | b1       | 63.12                   | 0.00000                | NO                    | YES   |
| 10 |      | e        | 77.33                   | 0.07908                | YES                   | YES   |
| 11 |      | e        | 77.33                   | 0.07908                | YES                   | YES   |
| 12 |      | b2       | 79.40                   | 0.00000                | NO                    | YES   |
| 13 |      | a1       | 80.03                   | 0.39943                | YES                   | YES   |
| 14 |      | e        | 84.67                   | 0.06788                | YES                   | YES   |
| 15 |      | e        | 84.67                   | 0.06788                | YES                   | YES   |
| 16 |      | e        | 328.53                  | 0.21518                | YES                   | YES   |
| 17 |      | e        | 328.53                  | 0.21518                | YES                   | YES   |
| 18 |      | a1       | 332.86                  | 30.67683               | YES                   | YES   |
| 19 |      | a2       | 339.48                  | 0.00000                | NO                    | NO    |
| 20 |      | e        | 348.77                  | 49.17700               | YES                   | YES   |
| 21 |      | e        | 348.77                  | 49.17700               | YES                   | YES   |

|    |    |         |            |     |     |
|----|----|---------|------------|-----|-----|
| 22 | b1 | 388.10  | 0.00000    | NO  | YES |
| 23 | a1 | 403.53  | 1.23417    | YES | YES |
| 24 | e  | 426.67  | 1.04433    | YES | YES |
| 25 | e  | 426.67  | 1.04433    | YES | YES |
| 26 | b2 | 449.05  | 0.00000    | NO  | YES |
| 27 | b1 | 471.73  | 0.00000    | NO  | YES |
| 28 | a1 | 497.96  | 5.91232    | YES | YES |
| 29 | e  | 523.51  | 20.33481   | YES | YES |
| 30 | e  | 523.51  | 20.33481   | YES | YES |
| 31 | a1 | 536.63  | 61.18063   | YES | YES |
| 32 | e  | 603.49  | 24.55595   | YES | YES |
| 33 | e  | 603.49  | 24.55595   | YES | YES |
| 34 | a1 | 1867.69 | 1108.52180 | YES | YES |
| 35 | e  | 2070.26 | 1233.83312 | YES | YES |
| 36 | e  | 2070.26 | 1233.83312 | YES | YES |
| 37 | b1 | 2085.68 | 0.00000    | NO  | YES |
| 38 | a1 | 2113.73 | 271.01490  | YES | YES |
| 39 | a1 | 2159.60 | 111.76938  | YES | YES |

§end

**[Mo(CO)<sub>6</sub>]<sup>+</sup> (*D*<sub>3d</sub> symmetry @BP86-D3BJ/def2-TZVPP)**

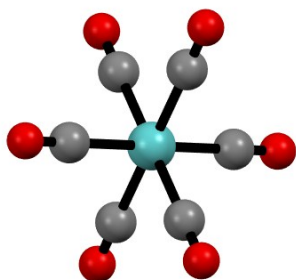

§coord

|                   |                    |                   |    |
|-------------------|--------------------|-------------------|----|
| 0.000000000000000 | -0.000000000000000 | 0.000000000000000 | mo |
| 2.91589332682140  | -1.68349179716858  | 2.09617714017994  | c  |
| -2.91589332682140 | 1.68349179716858   | -2.09617714017994 | c  |
| -2.91589332682140 | -1.68349179716858  | 2.09617714017994  | c  |
| 2.91589332682140  | 1.68349179716858   | -2.09617714017994 | c  |
| 0.000000000000000 | -3.36698359433713  | -2.09617714017994 | c  |
| 0.000000000000000 | 3.36698359433713   | 2.09617714017994  | c  |
| 4.51417666910794  | -2.60626111507899  | 3.20507652102789  | o  |
| 0.000000000000000 | -5.21252223015800  | -3.20507652102789 | o  |
| -4.51417666910794 | -2.60626111507899  | 3.20507652102789  | o  |
| 4.51417666910794  | 2.60626111507899   | -3.20507652102789 | o  |
| -4.51417666910794 | 2.60626111507899   | -3.20507652102789 | o  |
| 0.000000000000000 | 5.21252223015800   | 3.20507652102789  | o  |

§vibrational spectrum

| #  | mode | symmetry | wave number<br>cm**(-1) | IR intensity<br>km/mol | selection rules |       |
|----|------|----------|-------------------------|------------------------|-----------------|-------|
| #  |      |          |                         |                        | IR              | RAMAN |
| 1  |      |          | -0.00                   | 0.00000                | -               | -     |
| 2  |      |          | 0.00                    | 0.00000                | -               | -     |
| 3  |      |          | 0.00                    | 0.00000                | -               | -     |
| 4  |      |          | 0.00                    | 0.00000                | -               | -     |
| 5  |      |          | 0.00                    | 0.00000                | -               | -     |
| 6  |      |          | 0.00                    | 0.00000                | -               | -     |
| 7  |      | eu       | 49.68                   | 0.39120                | YES             | NO    |
| 8  |      | eu       | 49.68                   | 0.39120                | YES             | NO    |
| 9  |      | a2u      | 65.79                   | 0.38918                | YES             | NO    |
| 10 |      | alu      | 66.46                   | 0.00000                | NO              | NO    |
| 11 |      | alg      | 72.70                   | 0.00000                | NO              | YES   |
| 12 |      | eg       | 76.24                   | 0.00000                | NO              | YES   |
| 13 |      | eg       | 76.24                   | 0.00000                | NO              | YES   |

|    |     |         |            |     |     |
|----|-----|---------|------------|-----|-----|
| 14 | eu  | 83.23   | 0.99784    | YES | NO  |
| 15 | eu  | 83.23   | 0.99784    | YES | NO  |
| 16 | eg  | 313.70  | 0.00000    | NO  | YES |
| 17 | eg  | 313.70  | 0.00000    | NO  | YES |
| 18 | a2g | 327.50  | 0.00000    | NO  | NO  |
| 19 | eu  | 343.80  | 34.10063   | YES | NO  |
| 20 | eu  | 343.80  | 34.10063   | YES | NO  |
| 21 | a2u | 343.89  | 21.27280   | YES | NO  |
| 22 | eg  | 346.74  | 0.00000    | NO  | YES |
| 23 | eg  | 346.74  | 0.00000    | NO  | YES |
| 24 | a1g | 385.02  | 0.00000    | NO  | YES |
| 25 | a1g | 406.84  | 0.00000    | NO  | YES |
| 26 | eu  | 434.66  | 1.27602    | YES | NO  |
| 27 | eu  | 434.66  | 1.27602    | YES | NO  |
| 28 | eg  | 444.15  | 0.00000    | NO  | YES |
| 29 | eg  | 444.15  | 0.00000    | NO  | YES |
| 30 | a2u | 463.18  | 55.11007   | YES | NO  |
| 31 | a1u | 507.06  | 0.00000    | NO  | NO  |
| 32 | eu  | 564.58  | 76.63279   | YES | NO  |
| 33 | eu  | 564.58  | 76.63279   | YES | NO  |
| 34 | eu  | 2071.50 | 1131.70585 | YES | NO  |
| 35 | eu  | 2071.50 | 1131.70585 | YES | NO  |
| 36 | a2u | 2072.61 | 876.82727  | YES | NO  |
| 37 | eg  | 2074.00 | 0.00000    | NO  | YES |
| 38 | eg  | 2074.00 | 0.00000    | NO  | YES |
| 39 | a1g | 2157.70 | 0.00000    | NO  | YES |

§end

### [Mo(CO)<sub>6</sub>]<sup>+</sup> (*D*<sub>3d</sub> symmetry @TPSSh-D3BJ/def2-TZVPP)

|                     |                     |                    |    |
|---------------------|---------------------|--------------------|----|
| -0.0000000000000000 | -0.0000000000000000 | 0.0000000000000000 | mo |
| 2.93734205882835    | 1.69587522836653    | -2.09012689431936  | c  |
| 4.52952372180140    | 2.61512174008285    | -3.17923454488749  | o  |
| 2.93734205882835    | -1.69587522836653   | 2.09012689431936   | c  |
| 4.52952372180140    | -2.61512174008285   | 3.17923454488749   | o  |
| -2.93734205882835   | -1.69587522836653   | 2.09012689431936   | c  |
| -4.52952372180140   | -2.61512174008285   | 3.17923454488749   | o  |
| -2.93734205882835   | 1.69587522836653    | -2.09012689431936  | c  |
| -4.52952372180140   | 2.61512174008285    | -3.17923454488749  | o  |
| 0.0000000000000000  | 3.39175045673311    | 2.09012689431936   | c  |
| 0.0000000000000000  | 5.23024348016567    | 3.17923454488749   | o  |
| 0.0000000000000000  | -3.39175045673311   | -2.09012689431936  | c  |
| 0.0000000000000000  | -5.23024348016567   | -3.17923454488749  | o  |

### [Mo(CO)<sub>6</sub>]<sup>+</sup> (*D*<sub>4h</sub> symmetry @TPSSh-D3BJ/def2-TZVPP)

|                    |                    |                    |    |
|--------------------|--------------------|--------------------|----|
| 0.0000000000000000 | 0.0000000000000000 | 0.0000000000000000 | mo |
| 0.0000000000000000 | 0.0000000000000000 | -3.92749382034803  | c  |
| 0.0000000000000000 | 0.0000000000000000 | -6.07015118331336  | o  |
| -2.83849374489425  | 2.83849374489425   | 0.0000000000000000 | c  |
| -4.34752557581842  | 4.34752557581842   | 0.0000000000000000 | o  |
| 0.0000000000000000 | 0.0000000000000000 | 3.92749382034803   | c  |
| 0.0000000000000000 | 0.0000000000000000 | 6.07015118331336   | o  |
| 2.83849374489425   | -2.83849374489425  | 0.0000000000000000 | c  |
| 4.34752557581842   | -4.34752557581842  | 0.0000000000000000 | o  |
| -2.83849374489425  | -2.83849374489425  | 0.0000000000000000 | c  |
| -4.34752557581842  | -4.34752557581842  | 0.0000000000000000 | o  |
| 2.83849374489425   | 2.83849374489425   | 0.0000000000000000 | c  |
| 4.34752557581842   | 4.34752557581842   | 0.0000000000000000 | o  |

### [Mo(CO)<sub>6</sub>]<sup>+</sup> (*D*<sub>3d</sub> symmetry @DLPNO-CCSD(T)/def2-TZVPP)

|    |                     |                     |                     |
|----|---------------------|---------------------|---------------------|
| Mo | -0.0000000000000000 | 0.0000000000000000  | 0.0000000000000000  |
| C  | 1.5540292000000000  | 0.8972192000000000  | -1.1065064000000000 |
| O  | 2.3958765000000000  | 1.3832600000000000  | -1.6841851000000000 |
| C  | 1.5540292000000000  | -0.8972192000000000 | 1.1065064000000000  |



```

O 2.395876500000000 -1.383260000000000 1.684185100000000
C -1.554029200000000 -0.897219200000000 1.106506400000000
O -2.395876500000000 -1.383260000000000 1.684185100000000
C -1.554029200000000 0.897219200000000 -1.106506400000000
O -2.395876500000000 1.383260000000000 -1.684185100000000
C -0.000000000000000 1.794438400000000 1.106506400000000
O -0.000000000000000 2.766519900000000 1.684185100000000
C -0.000000000000000 -1.794438400000000 -1.106506400000000
O 0.000000000000000 -2.766519900000000 -1.684185100000000
FINAL SINGLE POINT ENERGY -746.922299529868
T1 diagnostic ... 0.020366323

```

**[Mo(CO)<sub>6</sub>]<sup>+</sup> (*D*<sub>2h</sub> symmetry @DLPNO-CCSD(T)/def2-TZVPP)**

```

Mo 0.000000000000000 0.000000000000000 0.000000000000000
C 1.412626300000000 0.000000000000000 1.552738300000000
C -1.412626300000000 0.000000000000000 1.552738300000000
C -1.412626300000000 0.000000000000000 -1.552738300000000
C 0.000000000000000 2.126353800000000 0.000000000000000
C 1.412626300000000 0.000000000000000 -1.552738300000000
C 0.000000000000000 -2.126353800000000 0.000000000000000
O 0.000000000000000 3.255340100000000 0.000000000000000
O -2.159192500000000 0.000000000000000 -2.403282100000000
O -2.159192500000000 0.000000000000000 2.403282100000000
O 0.000000000000000 -3.255340100000000 0.000000000000000
O 2.159192500000000 0.000000000000000 2.403282100000000
O 2.159192500000000 0.000000000000000 -2.403282100000000
FINAL SINGLE POINT ENERGY -746.921851067340
T1 diagnostic ... 0.020375013

```

**[W(CO)<sub>6</sub>]<sup>+</sup> (*D*<sub>3d</sub> symmetry @BP86-D3BJ/def2-TZVPP)**

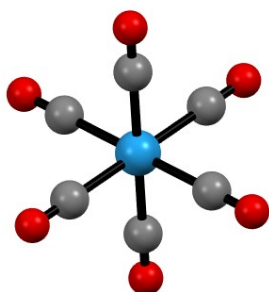

```

$coord
0.000000000000000 -0.000000000000000 0.000000000000000 w
-2.92199099492087 1.68701228748725 2.10536672229622 c
2.92199099492087 -1.68701228748725 -2.10536672229622 c
-0.000000000000000 3.37402457497444 -2.10536672229622 c
-0.000000000000000 -3.37402457497444 2.10536672229622 c
-2.92199099492087 -1.68701228748725 -2.10536672229622 c
2.92199099492087 1.68701228748725 2.10536672229622 c
-4.51853940839188 2.60877994377900 3.22250123174188 o
-4.51853940839188 -2.60877994377900 -3.22250123174188 o
-0.000000000000000 5.21755988755796 -3.22250123174188 o
-0.000000000000000 -5.21755988755796 3.22250123174188 o
4.51853940839188 -2.60877994377900 -3.22250123174188 o
4.51853940839188 2.60877994377900 3.22250123174188 o

```

```

$vibrational spectrum
# mode symmetry wave number IR intensity selection rules
# cm**(-1) km/mol IR RAMAN
1 0.00 0.00000 - -
2 0.00 0.00000 - -

```

|    |     |         |            |     |     |
|----|-----|---------|------------|-----|-----|
| 3  |     | 0.00    | 0.00000    | -   | -   |
| 4  |     | 0.00    | 0.00000    | -   | -   |
| 5  |     | 0.00    | 0.00000    | -   | -   |
| 6  |     | 0.00    | 0.00000    | -   | -   |
| 7  | eu  | 49.74   | 0.32617    | YES | NO  |
| 8  | eu  | 49.74   | 0.32617    | YES | NO  |
| 9  | a2u | 62.00   | 0.03922    | YES | NO  |
| 10 | a1u | 66.97   | 0.00000    | NO  | NO  |
| 11 | a1g | 75.07   | 0.00000    | NO  | YES |
| 12 | eg  | 77.82   | 0.00000    | NO  | YES |
| 13 | eg  | 77.82   | 0.00000    | NO  | YES |
| 14 | eu  | 79.98   | 0.28881    | YES | NO  |
| 15 | eu  | 79.98   | 0.28881    | YES | NO  |
| 16 | eg  | 323.81  | 0.00000    | NO  | YES |
| 17 | eg  | 323.81  | 0.00000    | NO  | YES |
| 18 | a2g | 338.28  | 0.00000    | NO  | NO  |
| 19 | eu  | 339.58  | 46.66963   | YES | NO  |
| 20 | eu  | 339.58  | 46.66963   | YES | NO  |
| 21 | a2u | 341.67  | 34.70887   | YES | NO  |
| 22 | eg  | 368.51  | 0.00000    | NO  | YES |
| 23 | eg  | 368.51  | 0.00000    | NO  | YES |
| 24 | a1g | 403.14  | 0.00000    | NO  | YES |
| 25 | a1g | 416.16  | 0.00000    | NO  | YES |
| 26 | eg  | 439.42  | 0.00000    | NO  | YES |
| 27 | eg  | 439.42  | 0.00000    | NO  | YES |
| 28 | eu  | 441.66  | 0.74766    | YES | NO  |
| 29 | eu  | 441.66  | 0.74766    | YES | NO  |
| 30 | a2u | 455.25  | 39.09420   | YES | NO  |
| 31 | a1u | 515.56  | 0.00000    | NO  | NO  |
| 32 | eu  | 551.47  | 55.44791   | YES | NO  |
| 33 | eu  | 551.47  | 55.44791   | YES | NO  |
| 34 | eu  | 2062.27 | 1226.82834 | YES | NO  |
| 35 | eu  | 2062.27 | 1226.82834 | YES | NO  |
| 36 | a2u | 2062.72 | 958.61374  | YES | NO  |
| 37 | eg  | 2066.97 | 0.00000    | NO  | YES |
| 38 | eg  | 2066.97 | 0.00000    | NO  | YES |
| 39 | a1g | 2154.59 | 0.00000    | NO  | YES |

§end

**[W(CO)<sub>6</sub>]<sup>+</sup> (D<sub>3d</sub> symmetry @TPSSh-D3BJ/def2-TZVPP)**

|                    |                   |                   |   |
|--------------------|-------------------|-------------------|---|
| -0.000000000000000 | 0.000000000000000 | 0.000000000000000 | w |
| 2.93817085158138   | 1.69635373208562  | -2.09887899330716 | c |
| 4.52698638835355   | 2.61365680993369  | -3.19972461663019 | o |
| 2.93817085158138   | -1.69635373208562 | 2.09887899330716  | c |
| 4.52698638835355   | -2.61365680993369 | 3.19972461663019  | o |
| -2.93817085158138  | -1.69635373208562 | 2.09887899330716  | c |
| -4.52698638835355  | -2.61365680993368 | 3.19972461663019  | o |
| -2.93817085158138  | 1.69635373208562  | -2.09887899330716 | c |
| -4.52698638835355  | 2.61365680993368  | -3.19972461663019 | o |
| -0.000000000000000 | 3.39270746417125  | 2.09887899330716  | c |
| 0.000000000000000  | 5.22731361986739  | 3.19972461663019  | o |
| -0.000000000000000 | -3.39270746417125 | -2.09887899330716 | c |

**[W(CO)<sub>6</sub>]<sup>+</sup> (D<sub>4h</sub> symmetry @TPSSh-D3BJ/def2-TZVPP)**

|                   |                   |                   |   |
|-------------------|-------------------|-------------------|---|
| 0.000000000000000 | 0.000000000000000 | 0.000000000000000 | w |
| 0.000000000000000 | 0.000000000000000 | -3.93992290111083 | c |
| 0.000000000000000 | 0.000000000000000 | -6.08508912125128 | o |
| -2.83908142561367 | 2.83908142561367  | 0.000000000000000 | c |
| -4.35014799922503 | 4.35014799922503  | 0.000000000000000 | o |
| 0.000000000000000 | 0.000000000000000 | 3.93992290111083  | c |
| 0.000000000000000 | 0.000000000000000 | 6.08508912125128  | o |
| 2.83908142561367  | -2.83908142561367 | 0.000000000000000 | c |
| 4.35014799922503  | -4.35014799922503 | 0.000000000000000 | o |
| -2.83908142561367 | -2.83908142561367 | 0.000000000000000 | c |
| -4.35014799922503 | -4.35014799922503 | 0.000000000000000 | o |
| 2.83908142561367  | 2.83908142561367  | 0.000000000000000 | c |

4.35014799922503 4.35014799922503 0.00000000000000 o

**[W(CO)<sub>6</sub>]<sup>+</sup> (D<sub>3d</sub> symmetry @DLPNO-CCSD(T)/def2-TZVPP)**

|   |                    |                    |                    |
|---|--------------------|--------------------|--------------------|
| W | 0.000000000000000  | 0.000000000000000  | 0.000000000000000  |
| C | 1.555259400000000  | 0.897929500000000  | -1.109756700000000 |
| O | 2.396846600000000  | 1.383820000000000  | -1.690698600000000 |
| C | 1.555259400000000  | -0.897929500000000 | 1.109756700000000  |
| O | 2.396846600000000  | -1.383820000000000 | 1.690698600000000  |
| C | -1.555259400000000 | -0.897929500000000 | 1.109756700000000  |
| O | -2.396846600000000 | -1.383820000000000 | 1.690698600000000  |
| C | -1.555259400000000 | 0.897929500000000  | -1.109756700000000 |
| O | -2.396846600000000 | 1.383820000000000  | -1.690698600000000 |
| C | 0.000000000000000  | 1.795858900000000  | 1.109756700000000  |
| O | -0.000000000000000 | 2.767640000000000  | 1.690698600000000  |
| C | 0.000000000000000  | -1.795858900000000 | -1.109756700000000 |
| O | 0.000000000000000  | -2.767640000000000 | -1.690698600000000 |

FINAL SINGLE POINT ENERGY -745.720888493062  
T1 diagnostic ... 0.019198053

**[W(CO)<sub>6</sub>]<sup>+</sup> (D<sub>2h</sub> symmetry @DLPNO-CCSD(T)/def2-TZVPP)**

|   |                    |                    |                    |
|---|--------------------|--------------------|--------------------|
| W | 0.000000000000000  | 0.000000000000000  | 0.000000000000000  |
| C | 1.415238100000000  | 0.000000000000000  | 1.555726300000000  |
| C | -1.415238100000000 | 0.000000000000000  | 1.555726300000000  |
| C | -1.415238100000000 | 0.000000000000000  | -1.555726300000000 |
| C | 0.000000000000000  | 2.126606800000000  | 0.000000000000000  |
| C | 1.415238100000000  | 0.000000000000000  | -1.555726300000000 |
| C | 0.000000000000000  | -2.126606800000000 | 0.000000000000000  |
| O | 0.000000000000000  | 3.257058500000000  | 0.000000000000000  |
| O | -2.167851700000000 | 0.000000000000000  | -2.402818200000000 |
| O | -2.167851700000000 | 0.000000000000000  | 2.402818200000000  |
| O | 0.000000000000000  | -3.257058500000000 | 0.000000000000000  |
| O | 2.167851700000000  | 0.000000000000000  | 2.402818200000000  |
| O | 2.167851700000000  | 0.000000000000000  | -2.402818200000000 |

FINAL SINGLE POINT ENERGY -745.720292810443  
T1 diagnostic ... 0.019187954

**[Cr(CO)<sub>6</sub>]<sup>+</sup> (D<sub>3d</sub> symmetry @DLPNO-CCSD(T)/def2-TZVPP)**

|    |                    |                    |                    |
|----|--------------------|--------------------|--------------------|
| Cr | 0.000000000000000  | -0.000000000000000 | 0.000000000000000  |
| C  | 1.444765100000000  | 0.834135500000000  | -1.057479200000000 |
| O  | 2.278917600000000  | 1.315733700000000  | -1.648144400000000 |
| C  | 1.444765100000000  | -0.834135500000000 | 1.057479200000000  |
| O  | 2.278917600000000  | -1.315733700000000 | 1.648144400000000  |
| C  | -1.444765100000000 | -0.834135500000000 | 1.057479200000000  |
| O  | -2.278917600000000 | -1.315733700000000 | 1.648144400000000  |
| C  | -1.444765100000000 | 0.834135500000000  | -1.057479200000000 |
| O  | -2.278917600000000 | 1.315733700000000  | -1.648144400000000 |
| C  | -0.000000000000000 | 1.668271000000000  | 1.057479200000000  |
| O  | 0.000000000000000  | 2.631467300000000  | 1.648144400000000  |
| C  | 0.000000000000000  | -1.668271000000000 | -1.057479200000000 |
| O  | -0.000000000000000 | -2.631467300000000 | -1.648144400000000 |

FINAL SINGLE POINT ENERGY -1722.635701647553  
T1 diagnostic ... 0.026540659

**[Cr(CO)<sub>6</sub>]<sup>+</sup> (D<sub>2h</sub> symmetry @DLPNO-CCSD(T)/def2-TZVPP)**

|    |                    |                   |                    |
|----|--------------------|-------------------|--------------------|
| Cr | 0.000000000000000  | 0.000000000000000 | 0.000000000000000  |
| C  | 1.329017300000000  | 0.000000000000000 | 1.447269900000000  |
| C  | -1.329017300000000 | 0.000000000000000 | 1.447269900000000  |
| C  | -1.329017300000000 | 0.000000000000000 | -1.447269900000000 |

```

C 0.0000000000000000 1.995893000000000 0.000000000000000
C 1.329017300000000 0.000000000000000 -1.447269900000000
C 0.0000000000000000 -1.995893000000000 0.000000000000000
O 0.0000000000000000 3.123713600000000 0.000000000000000
O -2.083097600000000 0.000000000000000 -2.290071500000000
O -2.083097600000000 0.000000000000000 2.290071500000000
O 0.0000000000000000 -3.123713600000000 0.000000000000000
O 2.083097600000000 0.000000000000000 2.290071500000000
O 2.083097600000000 0.000000000000000 -2.290071500000000
FINAL SINGLE POINT ENERGY -1722.635225255617
T1 diagnostic ... 0.026540357

```

## NBO and AIM analysis

For the QTAIM calculations (QTAIM = Quantum Theory of Atoms In Molecules) the multifunctional wavefunction analyzer Multiwfn was employed.<sup>[37]</sup> wfn input files were generated by single-point calculations on the B3LYP-D3BJ/def2-TZVPP level of theory employing TURBOMOLE. A basin analysis (options 17 + 1) has been performed on the electron density (option 1) employing a high quality grid (spacing = 0.06 Bohr, option 3). The electron density has been integrated with atomic-center + uniform grids and with exact refinement of the basin boundaries (options 7 + 2 + 1). As a result, the atomic charges after normalization are given. NBO analysis<sup>[38]</sup> was carried out with the implemented feature of TURBOMOLE with standard inputs based also on B3LYP-D3BJ/def2-TZVPPmsingle-point calculations.

## NBO

Summary of Natural Population Analysis:

### [Cr (CO)<sub>6</sub>]<sup>+</sup>

| Atom No   | Natural Charge | Natural Population |          |         | Total     |
|-----------|----------------|--------------------|----------|---------|-----------|
|           |                | Core               | Valence  | Rydberg |           |
| 1 cr      | -0.94560       | 17.97683           | 6.89783  | 0.07095 | 24.94560  |
| 2 c       | 0.67020        | 1.99942            | 3.27829  | 0.05209 | 5.32980   |
| 3 o       | -0.34593       | 1.99975            | 6.31152  | 0.03466 | 8.34593   |
| 4 c       | 0.67020        | 1.99942            | 3.27829  | 0.05209 | 5.32980   |
| 5 o       | -0.34593       | 1.99975            | 6.31152  | 0.03466 | 8.34593   |
| 6 c       | 0.67020        | 1.99942            | 3.27829  | 0.05209 | 5.32980   |
| 7 o       | -0.34593       | 1.99975            | 6.31152  | 0.03466 | 8.34593   |
| 8 c       | 0.67020        | 1.99942            | 3.27829  | 0.05209 | 5.32980   |
| 9 o       | -0.34593       | 1.99975            | 6.31152  | 0.03466 | 8.34593   |
| 10 c      | 0.67020        | 1.99942            | 3.27829  | 0.05209 | 5.32980   |
| 11 o      | -0.34593       | 1.99975            | 6.31152  | 0.03466 | 8.34593   |
| 12 c      | 0.67020        | 1.99942            | 3.27829  | 0.05209 | 5.32980   |
| 13 o      | -0.34593       | 1.99975            | 6.31152  | 0.03466 | 8.34593   |
| * Total * | 1.00000        | 41.97188           | 64.43667 | 0.59146 | 107.00000 |

**[Mo (CO)<sub>6</sub>]<sup>+</sup>**

| Atom No   | Natural Charge | Natural Population |          |         | Total    |
|-----------|----------------|--------------------|----------|---------|----------|
|           |                | Core               | Valence  | Rydberg |          |
| 1 mo      | -0.56976       | 7.96606            | 6.56952  | 0.03419 | 14.56976 |
| 2 c       | 0.60270        | 1.99947            | 3.34871  | 0.04912 | 5.39730  |
| 3 c       | 0.60270        | 1.99947            | 3.34871  | 0.04912 | 5.39730  |
| 4 c       | 0.60270        | 1.99947            | 3.34871  | 0.04912 | 5.39730  |
| 5 c       | 0.60270        | 1.99947            | 3.34871  | 0.04912 | 5.39730  |
| 6 c       | 0.60270        | 1.99947            | 3.34871  | 0.04912 | 5.39730  |
| 7 c       | 0.60270        | 1.99947            | 3.34871  | 0.04912 | 5.39730  |
| 8 o       | -0.34107       | 1.99975            | 6.30663  | 0.03469 | 8.34107  |
| 9 o       | -0.34107       | 1.99975            | 6.30663  | 0.03469 | 8.34107  |
| 10 o      | -0.34107       | 1.99975            | 6.30663  | 0.03469 | 8.34107  |
| 11 o      | -0.34107       | 1.99975            | 6.30663  | 0.03469 | 8.34107  |
| 12 o      | -0.34107       | 1.99975            | 6.30663  | 0.03469 | 8.34107  |
| 13 o      | -0.34107       | 1.99975            | 6.30663  | 0.03469 | 8.34107  |
| * Total * | 1.00000        | 31.96139           | 64.50157 | 0.53703 | 97.00000 |

**[W (CO)<sub>6</sub>]<sup>+</sup>**

| Atom No   | Natural Charge | Natural Population |          |         | Total    |
|-----------|----------------|--------------------|----------|---------|----------|
|           |                | Core               | Valence  | Rydberg |          |
| 1 w       | -0.33753       | 7.96728            | 6.33174  | 0.03850 | 14.33753 |
| 2 c       | 0.55991        | 1.99949            | 3.39296  | 0.04764 | 5.44009  |
| 3 c       | 0.55991        | 1.99949            | 3.39296  | 0.04764 | 5.44009  |
| 4 c       | 0.55991        | 1.99949            | 3.39296  | 0.04764 | 5.44009  |
| 5 c       | 0.55991        | 1.99949            | 3.39296  | 0.04764 | 5.44009  |
| 6 c       | 0.55991        | 1.99949            | 3.39296  | 0.04764 | 5.44009  |
| 7 c       | 0.55991        | 1.99949            | 3.39296  | 0.04764 | 5.44009  |
| 8 o       | -0.33699       | 1.99975            | 6.30179  | 0.03545 | 8.33699  |
| 9 o       | -0.33699       | 1.99975            | 6.30179  | 0.03545 | 8.33699  |
| 10 o      | -0.33699       | 1.99975            | 6.30179  | 0.03545 | 8.33699  |
| 11 o      | -0.33699       | 1.99975            | 6.30179  | 0.03545 | 8.33699  |
| 12 o      | -0.33699       | 1.99975            | 6.30179  | 0.03545 | 8.33699  |
| 13 o      | -0.33699       | 1.99975            | 6.30179  | 0.03545 | 8.33699  |
| * Total * | 1.00000        | 31.96272           | 64.50023 | 0.53705 | 97.00000 |

**AIM**

The atomic charges after normalization and atomic volumes:

**[Cr (CO)<sub>6</sub>]<sup>+</sup>**

|        |         |           |         |                           |
|--------|---------|-----------|---------|---------------------------|
| 1 (Cr) | Charge: | 1.290665  | Volume: | 61.207 Bohr <sup>3</sup>  |
| 2 (C)  | Charge: | 1.047795  | Volume: | 75.368 Bohr <sup>3</sup>  |
| 3 (O)  | Charge: | -1.096250 | Volume: | 129.135 Bohr <sup>3</sup> |
| 4 (C)  | Charge: | 1.047798  | Volume: | 75.368 Bohr <sup>3</sup>  |
| 5 (O)  | Charge: | -1.096253 | Volume: | 129.135 Bohr <sup>3</sup> |
| 6 (C)  | Charge: | 1.047799  | Volume: | 75.368 Bohr <sup>3</sup>  |
| 7 (O)  | Charge: | -1.096254 | Volume: | 129.135 Bohr <sup>3</sup> |
| 8 (C)  | Charge: | 1.047791  | Volume: | 75.368 Bohr <sup>3</sup>  |
| 9 (O)  | Charge: | -1.096246 | Volume: | 129.135 Bohr <sup>3</sup> |
| 10 (C) | Charge: | 1.047794  | Volume: | 75.348 Bohr <sup>3</sup>  |
| 11 (O) | Charge: | -1.096215 | Volume: | 129.133 Bohr <sup>3</sup> |
| 12 (C) | Charge: | 1.047796  | Volume: | 75.348 Bohr <sup>3</sup>  |
| 13 (O) | Charge: | -1.096217 | Volume: | 129.133 Bohr <sup>3</sup> |

**[Mo (CO)<sub>6</sub>]<sup>+</sup>**

|        |         |           |         |                           |
|--------|---------|-----------|---------|---------------------------|
| 1 (Mo) | Charge: | 1.490151  | Volume: | 96.091 Bohr <sup>3</sup>  |
| 2 (C)  | Charge: | 1.011291  | Volume: | 80.463 Bohr <sup>3</sup>  |
| 3 (C)  | Charge: | 1.011293  | Volume: | 80.463 Bohr <sup>3</sup>  |
| 4 (C)  | Charge: | 1.011292  | Volume: | 80.463 Bohr <sup>3</sup>  |
| 5 (C)  | Charge: | 1.011294  | Volume: | 80.463 Bohr <sup>3</sup>  |
| 6 (C)  | Charge: | 1.010499  | Volume: | 80.437 Bohr <sup>3</sup>  |
| 7 (C)  | Charge: | 1.010485  | Volume: | 80.437 Bohr <sup>3</sup>  |
| 8 (O)  | Charge: | -1.092874 | Volume: | 129.178 Bohr <sup>3</sup> |

|         |         |           |         |                |
|---------|---------|-----------|---------|----------------|
| 9 (O )  | Charge: | -1.092405 | Volume: | 129.181 Bohr^3 |
| 10 (O ) | Charge: | -1.092875 | Volume: | 129.178 Bohr^3 |
| 11 (O ) | Charge: | -1.092876 | Volume: | 129.178 Bohr^3 |
| 12 (O ) | Charge: | -1.092876 | Volume: | 129.178 Bohr^3 |
| 13 (O ) | Charge: | -1.092392 | Volume: | 129.181 Bohr^3 |

**[W(CO)<sub>6</sub>]<sup>+</sup>**

|         |         |           |         |                |
|---------|---------|-----------|---------|----------------|
| 1 (W )  | Charge: | 1.659214  | Volume: | 101.396 Bohr^3 |
| 2 (C )  | Charge: | 0.976235  | Volume: | 80.477 Bohr^3  |
| 3 (C )  | Charge: | 0.976235  | Volume: | 80.477 Bohr^3  |
| 4 (C )  | Charge: | 0.976236  | Volume: | 80.477 Bohr^3  |
| 5 (C )  | Charge: | 0.976235  | Volume: | 80.477 Bohr^3  |
| 6 (C )  | Charge: | 0.975868  | Volume: | 80.483 Bohr^3  |
| 7 (C )  | Charge: | 0.975865  | Volume: | 80.483 Bohr^3  |
| 8 (O )  | Charge: | -1.086016 | Volume: | 128.919 Bohr^3 |
| 9 (O )  | Charge: | -1.085912 | Volume: | 128.903 Bohr^3 |
| 10 (O ) | Charge: | -1.086017 | Volume: | 128.919 Bohr^3 |
| 11 (O ) | Charge: | -1.086015 | Volume: | 128.919 Bohr^3 |
| 12 (O ) | Charge: | -1.086016 | Volume: | 128.919 Bohr^3 |
| 13 (O ) | Charge: | -1.085908 | Volume: | 128.903 Bohr^3 |

## Reaction Enthalpies

$$H_g^\circ = E_{\text{SCF}} + E_{\text{ZPE}} + RT = E_{\text{SCF}} + E_{\text{ZPE}} + 2.48 \text{ kJ mol}^{-1}$$

|                                                                             | Enthalpy H (kJ mol <sup>-1</sup> ) |                   | Reaction                                                                                                                                                           | $\Delta_R H_g^\circ$ (kJ mol <sup>-1</sup> ) |       |
|-----------------------------------------------------------------------------|------------------------------------|-------------------|--------------------------------------------------------------------------------------------------------------------------------------------------------------------|----------------------------------------------|-------|
|                                                                             | BP86                               | B3LYP             |                                                                                                                                                                    | BP86                                         | B3LYP |
| CO (C <sub>6v</sub> )                                                       | -297620.9347443340                 | -297476.31921281  | Cr(CO) <sub>6</sub> + [NO] <sup>+</sup> -> [Cr(CO) <sub>6</sub> ] <sup>+</sup> + NO                                                                                | -71                                          | -143  |
| NO (C <sub>2v</sub> )                                                       | -341192.7487023620                 | -341010.51564983  | Cr(CO) <sub>6</sub> + [NO] <sup>+</sup> -> [Cr(CO) <sub>5</sub> (NO)] <sup>+</sup> + CO                                                                            | -240                                         | -245  |
| [NO] <sup>+</sup> (C <sub>6v</sub> )                                        | -340264.7504791870                 | -340084.09190075  | Mo(CO) <sub>6</sub> + [NO] <sup>+</sup> -> [Mo(CO) <sub>6</sub> ] <sup>+</sup> + NO                                                                                | -82                                          | -121  |
| Cr(CO) <sub>6</sub> (O <sub>h</sub> )                                       | -4529249.5821833200                | -4527504.71515699 | Mo(CO) <sub>6</sub> + [NO] <sup>+</sup> -> [Mo(CO) <sub>5</sub> (NO)] <sup>+</sup> + CO                                                                            | -252                                         | -255  |
| [Cr(CO) <sub>6</sub> ] <sup>+</sup> (D <sub>3d</sub> )                      | -4528392.4375271400                | -4526721.08755285 | W(CO) <sub>6</sub> + [NO] <sup>+</sup> -> [W(CO) <sub>6</sub> ] <sup>+</sup> + NO                                                                                  | -84                                          | -119  |
| [Cr(CO) <sub>5</sub> (NO)] <sup>+</sup> (C <sub>4v</sub> )                  | -4572133.5112971100                | -4570357.91460443 | W(CO) <sub>6</sub> + [NO] <sup>+</sup> -> [W(CO) <sub>5</sub> (NO)] <sup>+</sup> + CO                                                                              | -254                                         | -255  |
| Cr(CO) <sub>6</sub> OR <sup>f</sup> (C <sub>s</sub> ) (OR <sup>f</sup> -CO) | -7487368.3936561300                | -7484337.11257795 | [AgI <sub>2</sub> ] <sup>+</sup> + Cr(CO) <sub>6</sub> -> [Cr(CO) <sub>6</sub> I] <sup>+</sup> + AgI                                                               | 58                                           | 66    |
| Mo(CO) <sub>6</sub> (O <sub>h</sub> )                                       | -1965943.7390771100                | -1964569.79225696 | [AgI <sub>2</sub> ] <sup>+</sup> + Mo(CO) <sub>6</sub> -> [Mo(CO) <sub>6</sub> I] <sup>+</sup> + AgI                                                               | 8                                            | 14    |
| [Mo(CO) <sub>6</sub> ] <sup>+</sup> (D <sub>3d</sub> )                      | -1965097.5849938200                | -1963764.53838315 | [AgI <sub>2</sub> ] <sup>+</sup> + W(CO) <sub>6</sub> -> [W(CO) <sub>6</sub> I] <sup>+</sup> + AgI                                                                 | -8                                           | -6    |
| [Mo(CO) <sub>5</sub> (NO)] <sup>+</sup> (C <sub>4v</sub> )                  | -2008839.8657202900                | -2007432.12259521 | Si(CH <sub>3</sub> ) <sub>3</sub> F + [Cr(CO) <sub>6</sub> ] <sup>+</sup> -> [Si(CH <sub>3</sub> ) <sub>3</sub> ] <sup>+</sup> + Cr(CO) <sub>6</sub> F             | 247                                          | 314   |
| W(CO) <sub>6</sub> (O <sub>h</sub> )                                        | -1963059.7220820500                | -1961635.52508363 | Si(CH <sub>3</sub> ) <sub>3</sub> F + [Cr(CO) <sub>6</sub> ] <sup>+</sup> -> [Si(CH <sub>3</sub> ) <sub>3</sub> ] <sup>+</sup> + Cr(CO) <sub>6</sub> F             | 218                                          | 288   |
| [W(CO) <sub>6</sub> ] <sup>+</sup> (D <sub>3d</sub> )                       | -1962215.9139033300                | -1960828.22510894 | Si(CH <sub>3</sub> ) <sub>3</sub> F + [Mo(CO) <sub>6</sub> ] <sup>+</sup> -> [Si(CH <sub>3</sub> ) <sub>3</sub> ] <sup>+</sup> + Mo(CO) <sub>6</sub> F             | 243                                          | 296   |
| [W(CO) <sub>5</sub> (NO)] <sup>+</sup> (C <sub>4v</sub> )                   | -2005957.0447520600                | -2004498.36133313 | Si(CH <sub>3</sub> ) <sub>3</sub> F + [W(CO) <sub>6</sub> ] <sup>+</sup> -> [Si(CH <sub>3</sub> ) <sub>3</sub> ] <sup>+</sup> + W(CO) <sub>6</sub> F               | 217                                          | 266   |
| Ag <sup>+</sup>                                                             | -385075.1025665400                 | -385075.10256654  | [Al(OR <sup>f</sup> ) <sub>4</sub> ] <sup>+</sup> + [Cr(CO) <sub>6</sub> ] <sup>+</sup> -> Al(OR <sup>f</sup> ) <sub>3</sub> + Cr(CO) <sub>6</sub> OR <sup>f</sup> | -185                                         | -97   |
| [Cr(CO) <sub>6</sub> I] <sup>+</sup> (C <sub>2</sub> )                      | -5310487.4438307900                | -5308346.64203146 | [Al(OR <sup>f</sup> ) <sub>4</sub> ] <sup>+</sup> + [Mo(CO) <sub>6</sub> ] <sup>+</sup> -> Al(OR <sup>f</sup> ) <sub>3</sub> + Mo(CO) <sub>6</sub> OR <sup>f</sup> | -152                                         | -82   |
| [Mo(CO) <sub>6</sub> I] <sup>+</sup> (C <sub>2v</sub> )                     | -2747231.3588399100                | -2745463.49754842 | [Al(OR <sup>f</sup> ) <sub>4</sub> ] <sup>+</sup> + [W(CO) <sub>6</sub> ] <sup>+</sup> -> Al(OR <sup>f</sup> ) <sub>3</sub> + W(CO) <sub>6</sub> OR <sup>f</sup>   | -173                                         | -108  |
| [W(CO) <sub>6</sub> I] <sup>+</sup> (C <sub>2v</sub> )                      | -2744363.3335535200                | -2742549.07355968 | [OR <sup>f</sup> ] <sup>-</sup> + Cr(CO) <sub>6</sub> F -> F <sup>-</sup> + Cr(CO) <sub>6</sub> OR <sup>f</sup>                                                    | 227                                          | 197   |
| I <sup>-</sup> (O <sub>h</sub> )                                            | -782263.0457087000                 | -781865.11752138  | [OR <sup>f</sup> ] <sup>-</sup> + Mo(CO) <sub>6</sub> F -> F <sup>-</sup> + Mo(CO) <sub>6</sub> OR <sup>f</sup>                                                    | 236                                          | 229   |
| [AgI <sub>2</sub> ] <sup>+</sup> (C <sub>s</sub> )                          | -1949695.6811259600                | -1948545.73619812 | [OR <sup>f</sup> ] <sup>-</sup> + W(CO) <sub>6</sub> F -> F <sup>-</sup> + W(CO) <sub>6</sub> OR <sup>f</sup>                                                      | 240                                          | 233   |

|                                                                      |                      |                    |                                                                                                                                                        |    |     |
|----------------------------------------------------------------------|----------------------|--------------------|--------------------------------------------------------------------------------------------------------------------------------------------------------|----|-----|
| AgI (C <sub>6v</sub> )                                               | -1168399.8024311200  | -1167637.83368086  | Si(CH <sub>3</sub> ) <sub>3</sub> I + [Cr(CO) <sub>6</sub> ] <sup>+</sup> -> [Si(CH <sub>3</sub> ) <sub>3</sub> ] <sup>+</sup> + Cr(CO) <sub>6</sub> I | 84 | 145 |
| F <sup>-</sup> (O <sub>h</sub> )                                     | -262226.4367354260   | -262120.52624459   | Si(CH <sub>3</sub> ) <sub>3</sub> I + [Mo(CO) <sub>6</sub> ] <sup>+</sup> -> [Si(CH <sub>3</sub> ) <sub>3</sub> ] <sup>+</sup> + Mo(CO) <sub>6</sub> I | 80 | 115 |
| [OR <sup>F</sup> ] <sup>-</sup> (C <sub>3</sub> )                    | -2958450.5137634500  | -2957149.17012822  | Si(CH <sub>3</sub> ) <sub>3</sub> I + [W(CO) <sub>6</sub> ] <sup>+</sup> -> [Si(CH <sub>3</sub> ) <sub>3</sub> ] <sup>+</sup> + W(CO) <sub>6</sub> I   | 82 | 111 |
| [FAl(OR <sup>F</sup> ) <sub>3</sub> ] <sup>-</sup> (C <sub>1</sub> ) | -9774696.2332965300  | -9770616.09924771  |                                                                                                                                                        |    |     |
| [Al(OR <sup>F</sup> ) <sub>4</sub> ] <sup>-</sup> (S <sub>4</sub> )  | -12470685.2959277000 | -12465424.04199000 |                                                                                                                                                        |    |     |
| Al(OR <sup>F</sup> ) <sub>3</sub> (C <sub>1</sub> )                  | -9511894.7414240200  | -9507905.22665207  |                                                                                                                                                        |    |     |
| [Si(CH <sub>3</sub> ) <sub>3</sub> ] <sup>+</sup> (C <sub>3h</sub> ) | -1073759.6016105100  | -1073349.74637593  |                                                                                                                                                        |    |     |
| Si(CH <sub>3</sub> ) <sub>3</sub> F (C <sub>3v</sub> )               | -1336956.2113476900  | -1336447.37701712  |                                                                                                                                                        |    |     |
| Si(CH <sub>3</sub> ) <sub>3</sub> I (C <sub>3v</sub> )               | -1856680.6808195500  | -1855863.25381724  |                                                                                                                                                        |    |     |
| Cr(CO) <sub>6</sub> F (C <sub>2v</sub> ) (F-Cr)                      | -4791341.9391892800  | -4789505.19414006  |                                                                                                                                                        |    |     |
| Cr(CO) <sub>6</sub> F (C <sub>1</sub> ) (F-CO)                       | -4791371.2350889100  | -4789531.15403589  |                                                                                                                                                        |    |     |
| Mo(CO) <sub>6</sub> F (C <sub>2v</sub> )                             | -2228051.3136591000  | -2226566.03190243  |                                                                                                                                                        |    |     |
| W(CO) <sub>6</sub> F (C <sub>2v</sub> )                              | -2225195.0587594300  | -2223659.60758187  |                                                                                                                                                        |    |     |
| W(CO) <sub>6</sub> OR <sup>F</sup> (C <sub>1</sub> )                 | -4921179.2108438400  | -4918454.90350666  |                                                                                                                                                        |    |     |
| [W(CO) <sub>6</sub> OR <sup>F</sup> ] <sup>+</sup> (C <sub>1</sub> ) | -4920504.6611423600  | -4917809.17463674  |                                                                                                                                                        |    |     |
| Cr(CO) <sub>6</sub> I (C <sub>3v</sub> )                             | -5311229.3059130400  | -5309089.31058798  |                                                                                                                                                        |    |     |
| Mo(CO) <sub>6</sub> I (C <sub>3v</sub> )                             | -2747938.2591119400  | -2746163.49078459  |                                                                                                                                                        |    |     |
| W(CO) <sub>6</sub> I (C <sub>1</sub> )                               | -2745055.1229314600  | -2743230.29893051  |                                                                                                                                                        |    |     |
| Mo(CO) <sub>6</sub> OR <sup>F</sup> (C <sub>1</sub> )                | -4924039.7784719100  | -4921365.43342563  |                                                                                                                                                        |    |     |
| [Cr(CO) <sub>6</sub> ] <sup>+</sup> (C <sub>2</sub> )                | -5310487.4438307900  | -5308346.64203146  |                                                                                                                                                        |    |     |
| [Mo(CO) <sub>6</sub> I] <sup>+</sup> (C <sub>2v</sub> )              | -2747231.3588399100  | -2745463.49754842  |                                                                                                                                                        |    |     |
| [W(CO) <sub>6</sub> ] <sup>+</sup> (C <sub>2v</sub> )                | -2744363.3335535200  | -2742549.07355968  |                                                                                                                                                        |    |     |
| [W <sub>2</sub> (CO) <sub>12</sub> ] <sup>2+</sup> (C <sub>1</sub> ) | -3924247.9571920700  | -                  |                                                                                                                                                        |    |     |



|                                                                             | $E_{\text{scf}}$ (kJ mol <sup>-1</sup> ) |                     | $E_{\text{ZPE}}$ (kJ mol <sup>-1</sup> ) |          |
|-----------------------------------------------------------------------------|------------------------------------------|---------------------|------------------------------------------|----------|
|                                                                             | BP86                                     | B3LYP               | BP86                                     | B3LYP    |
| CO (C <sub>6v</sub> )                                                       | -297642.3247443340                       | -297498.2292128050  | 18.910                                   | 19.430   |
| NO (C <sub>2v</sub> )                                                       | -341212.6987023620                       | -341031.0156498320  | 17.470                                   | 18.020   |
| [NO] <sup>+</sup> (C <sub>6v</sub> )                                        | -340287.5504791870                       | -340107.6219007530  | 20.320                                   | 21.050   |
| Cr(CO) <sub>6</sub> (O <sub>h</sub> )                                       | -4529419.4121833200                      | -4527677.0951569900 | 167.350                                  | 169.900  |
| [Cr(CO) <sub>6</sub> ] <sup>+</sup> (D <sub>3d</sub> )                      | -4528563.4575271400                      | -4526891.4575528500 | 168.540                                  | 167.890  |
| [Cr(CO) <sub>5</sub> (NO)] <sup>+</sup> (C <sub>4v</sub> )                  | -4572303.7412971100                      | -4570530.8846044300 | 167.750                                  | 170.490  |
| Cr(CO) <sub>6</sub> OR <sup>F</sup> (C <sub>1</sub> ) (OR <sup>F</sup> -CO) | -7487712.0736561300                      | -7484687.6326       | 341.200                                  | 348.040  |
| Mo(CO) <sub>6</sub> (O <sub>h</sub> )                                       | -1966110.3890771100                      | -1964739.4022569600 | 164.170                                  | 167.130  |
| [Mo(CO) <sub>6</sub> ] <sup>+</sup> (D <sub>3d</sub> )                      | -1965263.4049938200                      | -1963933.5183831500 | 163.340000                               | 166.500  |
| [Mo(CO) <sub>5</sub> (NO)] <sup>+</sup> (C <sub>4v</sub> )                  | -2009007.2157202900                      | -2007602.6725952100 | 164.870                                  | 168.070  |
| W(CO) <sub>6</sub> (O <sub>h</sub> )                                        | -1963226.0520820500                      | -1961804.9450836300 | 163.850                                  | 166.940  |
| [W(CO) <sub>6</sub> ] <sup>+</sup> (D <sub>3d</sub> )                       | -1962381.6539033300                      | -1960997.2551089400 | 163.260                                  | 166.550  |
| [W(CO) <sub>5</sub> (NO)] <sup>+</sup> (C <sub>4v</sub> )                   | -2006124.0447520600                      | -2004668.6713331300 | 164.520                                  | 167.830  |
| Ag <sup>+</sup>                                                             | -385081.3010018080                       | -385081.3010018080  | 3.718435                                 | 3.718435 |
| [Cr(CO) <sub>6</sub> ] <sup>+</sup> (C <sub>2</sub> )                       | -5310664.9038307900                      | -5308526.7520314600 | 174.980                                  | 177.630  |
| [Mo(CO) <sub>6</sub> ] <sup>+</sup> (C <sub>2v</sub> )                      | -2747406.4088399100                      | -2745641.9475484200 | 172.570                                  | 175.970  |
| [W(CO) <sub>6</sub> ] <sup>+</sup> (C <sub>2v</sub> )                       | -2744538.1635535200                      | -2742727.4535596800 | 172.350                                  | 175.900  |
| I <sup>-</sup> (O <sub>h</sub> )                                            | -782269.2441439680                       | -781871.3160        | 3.718435                                 | 3.718435 |
| [AgI <sub>2</sub> ] <sup>+</sup> (C <sub>s</sub> )                          | -1949713.3511259600                      | -1948563.3961981200 | 15.190                                   | 15.180   |
| AgI (C <sub>6v</sub> )                                                      | -1168411.1424311200                      | -1167649.1636808600 | 8.860                                    | 8.850    |
| F <sup>-</sup> (O <sub>h</sub> )                                            | -262232.6351706940                       | -262126.7247        | 3.718435                                 | 3.718435 |
| [OR <sup>F</sup> ] <sup>-</sup> (C <sub>s</sub> )                           | -2958615.2337634500                      | -2957319.2601282200 | 162.240                                  | 167.610  |
| [FAl(ORF) <sub>3</sub> ] <sup>-</sup> (C <sub>1</sub> )                     | -9775236.4432965300                      | -9771172.1892477100 | 537.730                                  | 553.610  |

|                                                                |                      |                      |         |         |
|----------------------------------------------------------------|----------------------|----------------------|---------|---------|
| $[\text{Al}(\text{OR}^f)_4]^- (\text{S}_4)$                    | -12471389.5759277000 | -12466151.7219900000 | 701.800 | 725.200 |
| $\text{Al}(\text{OR}^f)_3 (\text{C}_1)$                        | -9512427.4514240200  | -9508453.7666520700  | 530.230 | 546.060 |
| $[\text{Si}(\text{CH}_3)_3]^+ (\text{C}_{3h})$                 | -1074061.0916105100  | -1073658.0263759300  | 299.010 | 305.800 |
| $\text{Si}(\text{CH}_3)_3\text{F} (\text{C}_{3v})$             | -1337270.4313476900  | -1336768.4370171200  | 311.740 | 318.580 |
| $\text{Si}(\text{CH}_3)_3\text{I} (\text{C}_{3v})$             | -1856992.5908195500  | -1856182.0138172400  | 309.430 | 316.280 |
| $\text{Cr}(\text{CO})_6\text{F} (\text{C}_{2v}) (\text{F-Cr})$ | -4791516.0891892800  | -4789680.9541400600  | 171.670 | 173.280 |
| $\text{Cr}(\text{CO})_6\text{F} (\text{C}_1) (\text{F-CO})$    | -4791548.6250889100  | -4789710.3240358900  | 174.910 | 176.690 |
| $\text{Mo}(\text{CO})_6\text{F} (\text{C}_{2v})$               | -2228224.1336591000  | -2226742.0219024300  | 170.340 | 173.510 |
| $\text{W}(\text{CO})_6\text{F} (\text{C}_{2v})$                | -2225367.7787594300  | -2223835.3875818700  | 170.240 | 173.300 |
| $\text{W}(\text{CO})_6\text{OR}^f (\text{C}_1)$                | -4921517.6708438400  | -4918801.5435        | 335.980 | 344.160 |
| $[\text{W}(\text{CO})_6\text{OR}^f]^+ (\text{C}_1)$            | -4920847.5711423600  | -4918160.8346        | 340.430 | 349.180 |
| $\text{Cr}(\text{CO})_6\text{I} (\text{C}_{3v})$               | -5311405.3559130400  | -5309267.9005879800  | 173.570 | 176.110 |
| $\text{Mo}(\text{CO})_6\text{I} (\text{C}_{3v})$               | -2748111.7791119400  | -2746340.0307845900  | 171.040 | 174.060 |
| $\text{W}(\text{CO})_6\text{I} (\text{C}_1)$                   | -2745228.3829314600  | -2743406.7489305100  | 170.780 | 173.970 |
| $\text{Mo}(\text{CO})_6\text{OR}^f (\text{C}_1)$               | -4924378.1284719100  | -4921711.9134        | 335.870 | 344.000 |
| $[\text{Cr}(\text{CO})_6\text{I}]^+ (\text{C}_2)$              | -5310664.9038307900  | -5308526.7520314600  | 174.980 | 177.630 |
| $[\text{Mo}(\text{CO})_6\text{I}]^+ (\text{C}_{2v})$           | -2747406.4088399100  | -2745641.9475484200  | 172.570 | 175.970 |
| $[\text{W}(\text{CO})_6\text{I}]^+ (\text{C}_{2v})$            | -2744538.1635535200  | -2742727.4535596800  | 172.350 | 175.900 |
| $[\text{W}_2(\text{CO})_{12}]^{2+} (\text{C}_1)$               | -3924587.3571920700  |                      | 336.920 |         |

|                                                    | freeH energy freeH entropy |               | CH <sub>2</sub> Cl <sub>2</sub> , ε = 8.93 | oDFB, ε = 13.8   |                                                                                                                                                                    | Δ <sub>R</sub> G° <sub>soln</sub> (kJ mol <sup>-1</sup> ) |      |
|----------------------------------------------------|----------------------------|---------------|--------------------------------------------|------------------|--------------------------------------------------------------------------------------------------------------------------------------------------------------------|-----------------------------------------------------------|------|
|                                                    | freeH energy               | freeH entropy | COSMO energy                               | COSMO energy     |                                                                                                                                                                    | CH <sub>2</sub> Cl <sub>2</sub>                           | oDFB |
| [Cr(CO) <sub>6</sub> ] <sup>+</sup>                | 168.540                    | 0.48268       | -1724.9131867961                           | -1724.9179398358 | [Cr(CO) <sub>6</sub> ] <sup>+</sup> + F <sup>-</sup> -> Cr(CO) <sub>6</sub> F                                                                                      | -193                                                      | -161 |
| [Mo(CO) <sub>6</sub> ] <sup>+</sup>                | 163.340                    | 0.52888       | -748.5987773403                            | -748.6034025769  | [Mo(CO) <sub>6</sub> ] <sup>+</sup> + F <sup>-</sup> -> Mo(CO) <sub>6</sub> F                                                                                      | -205                                                      | -172 |
| [W(CO) <sub>6</sub> ] <sup>+</sup>                 | 163.260                    | 0.53149       | -747.5013733330                            | -747.5060141437  | [W(CO) <sub>6</sub> ] <sup>+</sup> + F <sup>-</sup> -> W(CO) <sub>6</sub> F                                                                                        | -225                                                      | -192 |
| Cr(CO) <sub>6</sub> F                              | 171.670                    | 0.53566       | -1825.0013990964                           | -1825.0022286007 |                                                                                                                                                                    |                                                           |      |
| Mo(CO) <sub>6</sub> F                              | 170.340                    | 0.56849       | -848.6943115051                            | -848.6949895849  | [Cr(CO) <sub>6</sub> ] <sup>+</sup> + [OR <sup>F</sup> ] <sup>-</sup> -> Cr(CO) <sub>6</sub> OR <sup>F</sup>                                                       | -107                                                      | -83  |
| W(CO) <sub>6</sub> F                               | 170.240                    | 0.56043       | -847.6057656844                            | -847.6063768114  | [Mo(CO) <sub>6</sub> ] <sup>+</sup> + [OR <sup>F</sup> ] <sup>-</sup> -> Mo(CO) <sub>6</sub> OR <sup>F</sup>                                                       | -94                                                       | -71  |
| Cr(CO) <sub>6</sub> OR <sup>F</sup>                | 338.720                    | 0.81835       | -2851.9162740079                           | -2851.9169858902 | [W(CO) <sub>6</sub> ] <sup>+</sup> + [OR <sup>F</sup> ] <sup>-</sup> -> W(CO) <sub>6</sub> OR <sup>F</sup>                                                         | -112                                                      | -88  |
| Mo(CO) <sub>6</sub> OR <sup>F</sup>                | 335.870                    | 0.82241       | -1875.6029149053                           | -1875.6034320887 |                                                                                                                                                                    |                                                           |      |
| W(CO) <sub>6</sub> OR <sup>F</sup>                 | 335.980                    | 0.81962       | -1874.5129048990                           | -1874.5133718026 | [Cr(CO) <sub>6</sub> ] <sup>+</sup> + [Al(OR <sup>F</sup> ) <sub>4</sub> ] <sup>-</sup> -> Cr(CO) <sub>6</sub> OR <sup>F</sup> + Al(OR <sup>F</sup> ) <sub>3</sub> | 90                                                        | 107  |
| [OR <sup>F</sup> ] <sup>-</sup>                    | 162.240                    | 0.46395       | -1126.9488506488                           | -1126.9536740721 | [Mo(CO) <sub>6</sub> ] <sup>+</sup> + [Al(OR <sup>F</sup> ) <sub>4</sub> ] <sup>-</sup> -> Mo(CO) <sub>6</sub> OR <sup>F</sup> + Al(OR <sup>F</sup> ) <sub>3</sub> | 102                                                       | 119  |
| F <sup>-</sup>                                     | 3.718                      | 0.14558       | -100.0082631972                            | -100.0165816745  | [W(CO) <sub>6</sub> ] <sup>+</sup> + [Al(OR <sup>F</sup> ) <sub>4</sub> ] <sup>-</sup> -> W(CO) <sub>6</sub> OR <sup>F</sup> + Al(OR <sup>F</sup> ) <sub>3</sub>   | 84                                                        | 102  |
| Al(OR <sup>F</sup> ) <sub>3</sub>                  | 530.230                    | 1.06111       | -3623.0945327556                           | -3623.0947315153 |                                                                                                                                                                    |                                                           |      |
| [FAl(OR <sup>F</sup> ) <sub>3</sub> ] <sup>-</sup> | 537.730                    | 1.13293       | -3723.2362119343                           | -3723.2392236424 | Al(OR <sup>F</sup> ) <sub>3</sub> + F <sup>-</sup> -> [FAl(OR <sup>F</sup> ) <sub>3</sub> ] <sup>-</sup>                                                           | -335                                                      | -320 |
| [Al(OR <sup>F</sup> ) <sub>4</sub> ] <sup>-</sup>  | 701.800                    | 1.31981       | -4750.1410726992                           | -4750.1436636479 | Al(OR <sup>F</sup> ) <sub>3</sub> + OR <sup>F</sup> -> [Al(OR <sup>F</sup> ) <sub>4</sub> ] <sup>-</sup>                                                           | -196                                                      | -190 |
| [W <sub>2</sub> (CO) <sub>12</sub> ] <sup>2+</sup> | 336.920                    | 0.88236       |                                            | -1495.0203856200 | 2 W(CO) <sub>6</sub> -> [W <sub>2</sub> (CO) <sub>12</sub> ] <sup>2+</sup>                                                                                         |                                                           | 32   |
| [Si(CH <sub>3</sub> ) <sub>3</sub> ] <sup>+</sup>  | 299.010                    | 0.35986       | -409.1648123711                            | -409.1697952226  |                                                                                                                                                                    |                                                           |      |
| Si(CH <sub>3</sub> ) <sub>3</sub> F                | 311.740                    | 0.35439       | -509.3434162118                            | -509.3437257407  | [Si(CH <sub>3</sub> ) <sub>3</sub> ] <sup>+</sup> + F <sup>-</sup> -> Si(CH <sub>3</sub> ) <sub>3</sub> F                                                          | -404                                                      | -370 |
| AgI                                                | 8.860                      | 0.26479       | -445.0349925725                            | -445.0359568253  |                                                                                                                                                                    |                                                           |      |
| [AgI <sub>2</sub> ] <sup>+</sup>                   | 15.190                     | 0.35391       | -742.6812244109                            | -742.6861734862  | [Cr(CO) <sub>6</sub> ] <sup>+</sup> + [FAl(OR <sup>F</sup> ) <sub>3</sub> ] <sup>-</sup> -> Cr(CO) <sub>6</sub> F + Al(OR <sup>F</sup> ) <sub>3</sub>              | 142                                                       | 159  |
| [Cr(CO) <sub>6</sub> ] <sup>+</sup>                | 174.980                    | 0.56120       | -2022.7923023640                           | -2022.7968327612 | [Mo(CO) <sub>6</sub> ] <sup>+</sup> + [FAl(OR <sup>F</sup> ) <sub>3</sub> ] <sup>-</sup> -> Mo(CO) <sub>6</sub> F + Al(OR <sup>F</sup> ) <sub>3</sub>              | 130                                                       | 148  |
| [Mo(CO) <sub>6</sub> ] <sup>+</sup>                | 172.570                    | 0.57757       | -1046.4990846028                           | -1046.5036100238 | [W(CO) <sub>6</sub> ] <sup>+</sup> + [FAl(OR <sup>F</sup> ) <sub>3</sub> ] <sup>-</sup> -> W(CO) <sub>6</sub> F + Al(OR <sup>F</sup> ) <sub>3</sub>                | 110                                                       | 128  |
| [W(CO) <sub>6</sub> ] <sup>+</sup>                 | 172.350                    | 0.57783       | -1045.4065689803                           | -1045.4110750947 |                                                                                                                                                                    |                                                           |      |
| Cr(CO) <sub>6</sub>                                | 167.350                    | 0.48268       | -1725.1687419034                           | -1725.1690568614 | [Cr(CO) <sub>6</sub> ] <sup>+</sup> + Si(CH <sub>3</sub> ) <sub>3</sub> F -> [Si(CH <sub>3</sub> ) <sub>3</sub> ] <sup>+</sup> + Cr(CO) <sub>6</sub> F             | 210                                                       | 208  |
| Mo(CO) <sub>6</sub>                                | 164.170                    | 0.50448       | -748.8555039709                            | -748.8557813820  | [Mo(CO) <sub>6</sub> ] <sup>+</sup> + Si(CH <sub>3</sub> ) <sub>3</sub> F -> [Si(CH <sub>3</sub> ) <sub>3</sub> ] <sup>+</sup> + Mo(CO) <sub>6</sub> F             | 199                                                       | 197  |
| W(CO) <sub>6</sub>                                 | 163.850                    | 0.50870       | -747.7570121896                            | -747.7572970954  | [W(CO) <sub>6</sub> ] <sup>+</sup> + Si(CH <sub>3</sub> ) <sub>3</sub> F -> [Si(CH <sub>3</sub> ) <sub>3</sub> ] <sup>+</sup> + W(CO) <sub>6</sub> F               | 179                                                       | 177  |
|                                                    |                            |               |                                            |                  | Cr(CO) <sub>6</sub> + [AgI <sub>2</sub> ] <sup>+</sup> -> [Cr(CO) <sub>6</sub> ] <sup>+</sup> + AgI                                                                | 64                                                        | 63   |
|                                                    |                            |               |                                            |                  | Mo(CO) <sub>6</sub> + [AgI <sub>2</sub> ] <sup>+</sup> -> [Mo(CO) <sub>6</sub> ] <sup>+</sup> + AgI                                                                | 14                                                        | 13   |
|                                                    |                            |               |                                            |                  | W(CO) <sub>6</sub> + [AgI <sub>2</sub> ] <sup>+</sup> -> [W(CO) <sub>6</sub> ] <sup>+</sup> + AgI                                                                  | -1                                                        | -1   |

## 10. References

- [1] A. Reisinger, *Chemistry with weakly coordinating anions. Strong Brønsted acids and group 11 metal complexes.*, Dissertation, University of Freiburg (Breisgau), 2006, Cuvillier, Göttingen, **2007**.
- [2] I. Krossing, *Chem. Eur. J.* **2001**, *7*, 490.
- [3] T. A. Engesser, C. Friedmann, A. Martens, D. Kratzert, P. J. Malinowski, I. Krossing, *Chem. Eur. J.* **2016**, *22*, 15085.
- [4] M. Rohde, L. O. Müller, D. Himmel, H. Scherer, I. Krossing, *Chem. Eur. J.* **2014**, *20*, 1218.
- [5] A. Martens, P. Weis, M. C. Krummer, M. Kreuzer, A. Meierhöfer, S. C. Meier, J. Bohnenberger, H. Scherer, I. Riddlestone, I. Krossing, *Chem. Sci.* **2018**, *9*, 7058.
- [6] G. Saielli, R. Bini, A. Bagno, *RSC Adv.* **2014**, *4*, 41605.
- [7] V. Wray, L. Ernst, E. Lustig, *J. Magn. Reson.* **1977**, *27*, 1.
- [8] SAINT V8.37A **2015**, Bruker AXS, Madison, Wisconsin, USA.
- [9] L. Krause, R. Herbst-Irmer, G. M. Sheldrick, D. Stalke, *J. Appl. Crystallogr.* **2015**, *48*, 3.
- [10] G. M. Sheldrick, *Acta Cryst. A* **2015**, *71*, 3.
- [11] G. M. Sheldrick, *Acta Cryst. A* **2008**, *64*, 112.
- [12] G. M. Sheldrick, *Acta Cryst. C* **2015**, *71*, 3.
- [13] C. B. Hübschle, G. M. Sheldrick, B. Dittrich, *J. Appl. Crystallogr.* **2011**, *44*, 1281.
- [14] D. Kratzert, J. J. Holstein, I. Krossing, *J. Appl. Crystallogr.* **2015**, *48*, 933.
- [15] C. F. Macrae, I. J. Bruno, J. A. Chisholm, P. R. Edgington, P. McCabe, E. Pidcock, L. Rodriguez-Monge, R. Taylor, J. van de Streek, P. A. Wood, *J. Appl. Crystallogr.* **2008**, *41*, 466.
- [16] O. V. Dolomanov, L. J. Bourhis, R. J. Gildea, J. A. K. Howard, H. Puschmann, *J. Appl. Crystallogr.* **2009**, *42*, 339.
- [17] S. Stoll, A. Schweiger, *J. Magn. Reson.* **2006**, *178*, 42.
- [18] a) R. Ahlrichs, M. Bär, M. Häser, H. Horn, C. Kölmel, *Chem. Phys. Lett.* **1989**, *162*, 165; b) O. Treutler, R. Ahlrichs, *J. Chem. Phys.* **1995**, *102*, 346.
- [19] a) J. P. Perdew, *Phys. Rev. B* **1986**, *33*, 8822; b) J. P. Perdew, *Phys. Rev. B* **1986**, *34*, 7406.
- [20] a) C. Lee, W. Yang, R. G. Parr, *Phys. Rev. B* **1988**, *37*, 785; b) A. D. Becke, *J. Chem. Phys.* **1993**, *98*, 5648.
- [21] a) M. Sierka, A. Hogekamp, R. Ahlrichs, *J. Chem. Phys.* **2003**, *118*, 9136; b) R. Ahlrichs, *Phys. Chem. Chem. Phys.* **2004**, *6*, 5119.

- [22] F. Weigend, R. Ahlrichs, *Phys. Chem. Chem. Phys.* **2005**, 7, 3297.
- [23] a) S. Grimme, J. Antony, S. Ehrlich, H. Krieg, *J. Chem. Phys.* **2010**, 132, 154104; b) S. Grimme, S. Ehrlich, L. Goerigk, *J. Comput. Chem.* **2011**, 32, 1456.
- [24] P. Deglmann, F. Furche, R. Ahlrichs, *Chem. Phys. Lett.* **2002**, 362, 511.
- [25] A. Klamt, G. Schüürmann, *J. Chem. Soc., Perkin Trans. 2* **1993**, 799.
- [26] a) J. Tao, J. P. Perdew, V. N. Staroverov, G. E. Scuseria, *Phys. Rev. Lett.* **2003**, 91, 146401; b) V. N. Staroverov, G. E. Scuseria, J. Tao, J. P. Perdew, *J. Chem. Phys.* **2003**, 119, 12129.
- [27] J. Bohnenberger, W. Feuerstein, D. Himmel, M. Daub, F. Breher, I. Krossing, *Nat. Commun.* **2019**, 10, 624.
- [28] F. Neese, *WIREs Comput. Mol. Sci.* **2012**, 2, 73.
- [29] a) R. Izsák, F. Neese, *Mol. Phys.* **2013**, 111, 1190; b) R. Izsák, F. Neese, *J. Chem. Phys.* **2011**, 135, 144105; c) F. Neese, *J. Comput. Chem.* **2003**, 24, 1740.
- [30] T. Helgaker, P. Jørgensen, J. Olsen, *Molecular electronic-structure Theory*, Wiley, Chichester, New York, **2012**.
- [31] a) M. Reiher, *Theor. Chem. Acc.* **2006**, 116, 241; b) F. Neese, A. Wolf, T. Fleig, M. Reiher, B. A. Hess, *J. Chem. Phys.* **2005**, 122, 204107.
- [32] *Atomic Data and Nuclear Data Tables* **1997**, 67, 207.
- [33] K. Eichkorn, F. Weigend, O. Treutler, R. Ahlrichs, *Theor. Chim. Acta* **1997**, 97, 119.
- [34] I. Raabe, K. Wagner, K. Guttsche, M. Wang, M. Grätzel, G. Santiso-Quiñones, I. Krossing, *Chem. Eur. J.* **2009**, 15, 1966.
- [35] A. J. Lehner, N. Trapp, H. Scherer, I. Krossing, *Dalton Trans.* **2011**, 40, 1448.
- [36] a) R. K. Szilagy, G. Frenking, *Organometallics* **1997**, 16, 4807; b) V. Jonas, W. Thiel, *Organometallics* **1998**, 17, 353; c) J. E. Ellis, *Organometallics* **2003**, 22, 3322.
- [37] T. Lu, F. Chen, *J. Comput. Chem.* **2012**, 33, 580.
- [38] A. E. Reed, R. B. Weinstock, F. Weinhold, *J. Chem. Phys.* **1985**, 83, 735.
